# Supplementary material
Source: PubMed Central journal article supplement (PMC6555489)

# Neuron properties and Identification

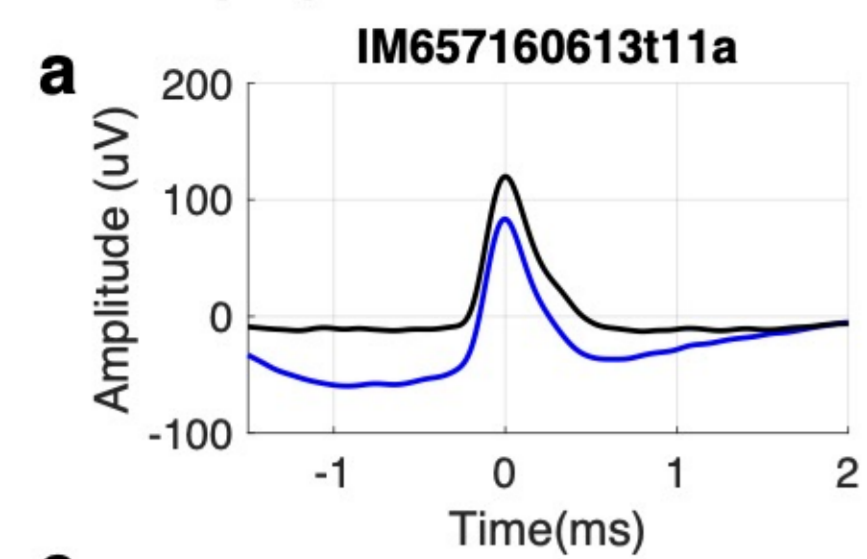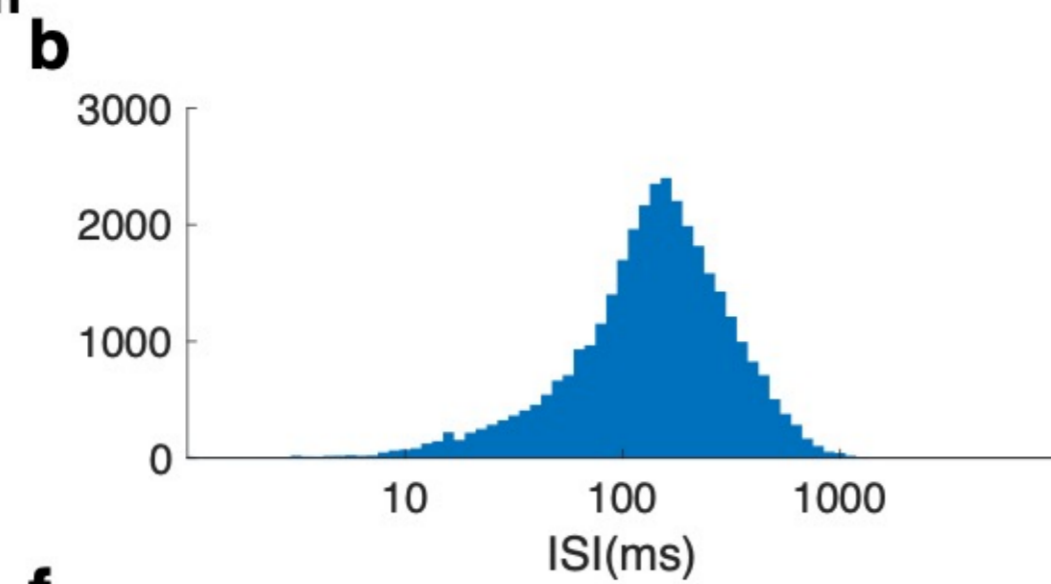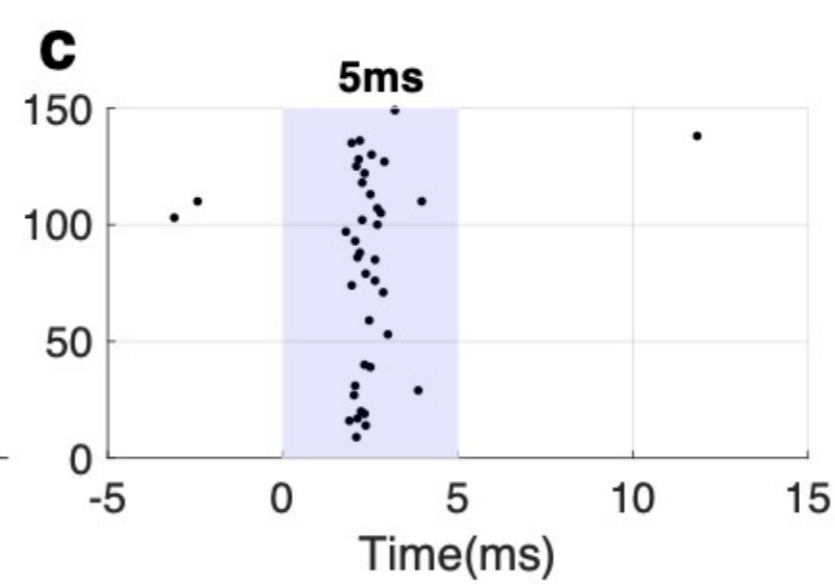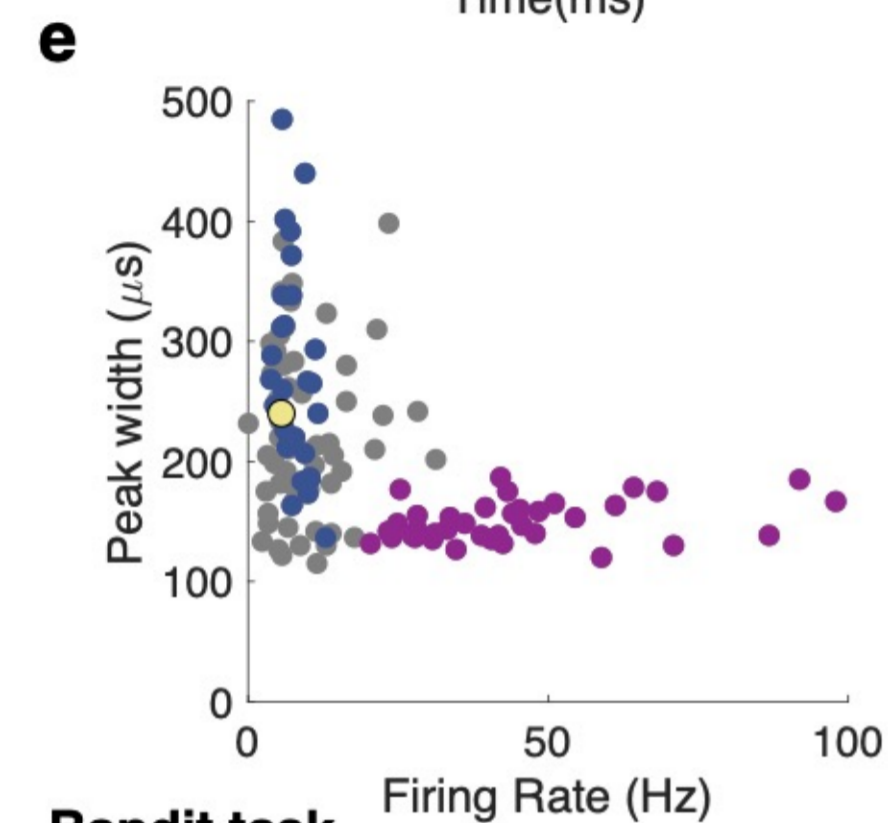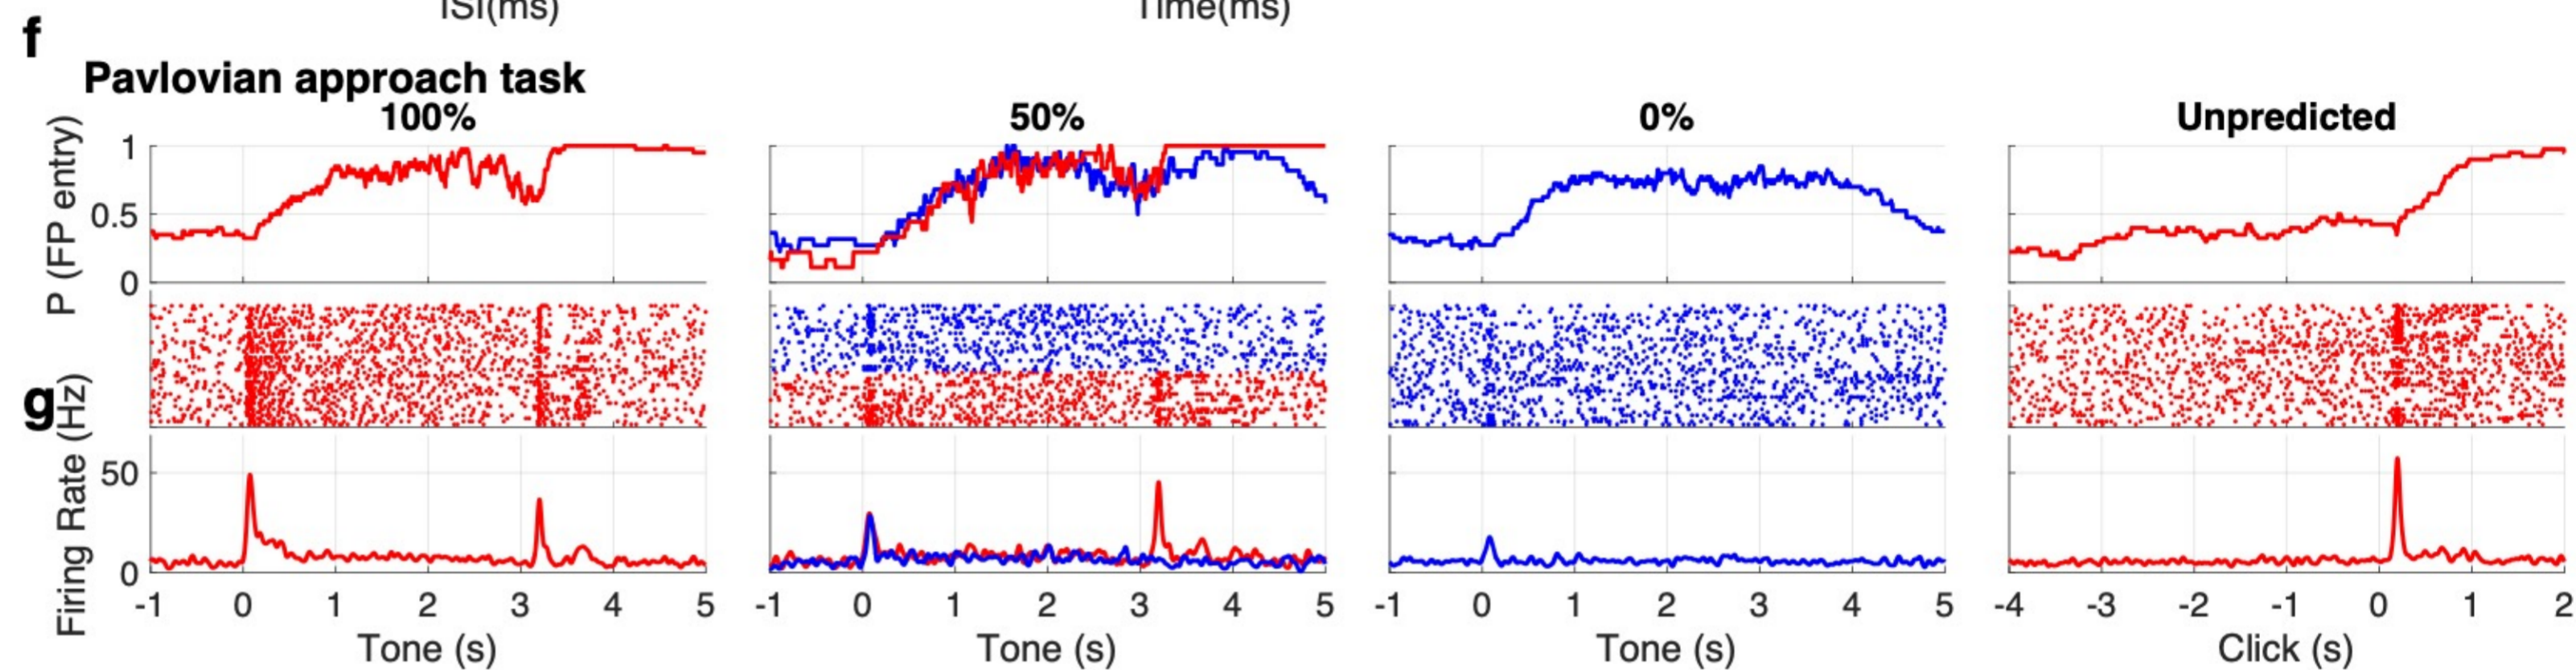

## Bandit task

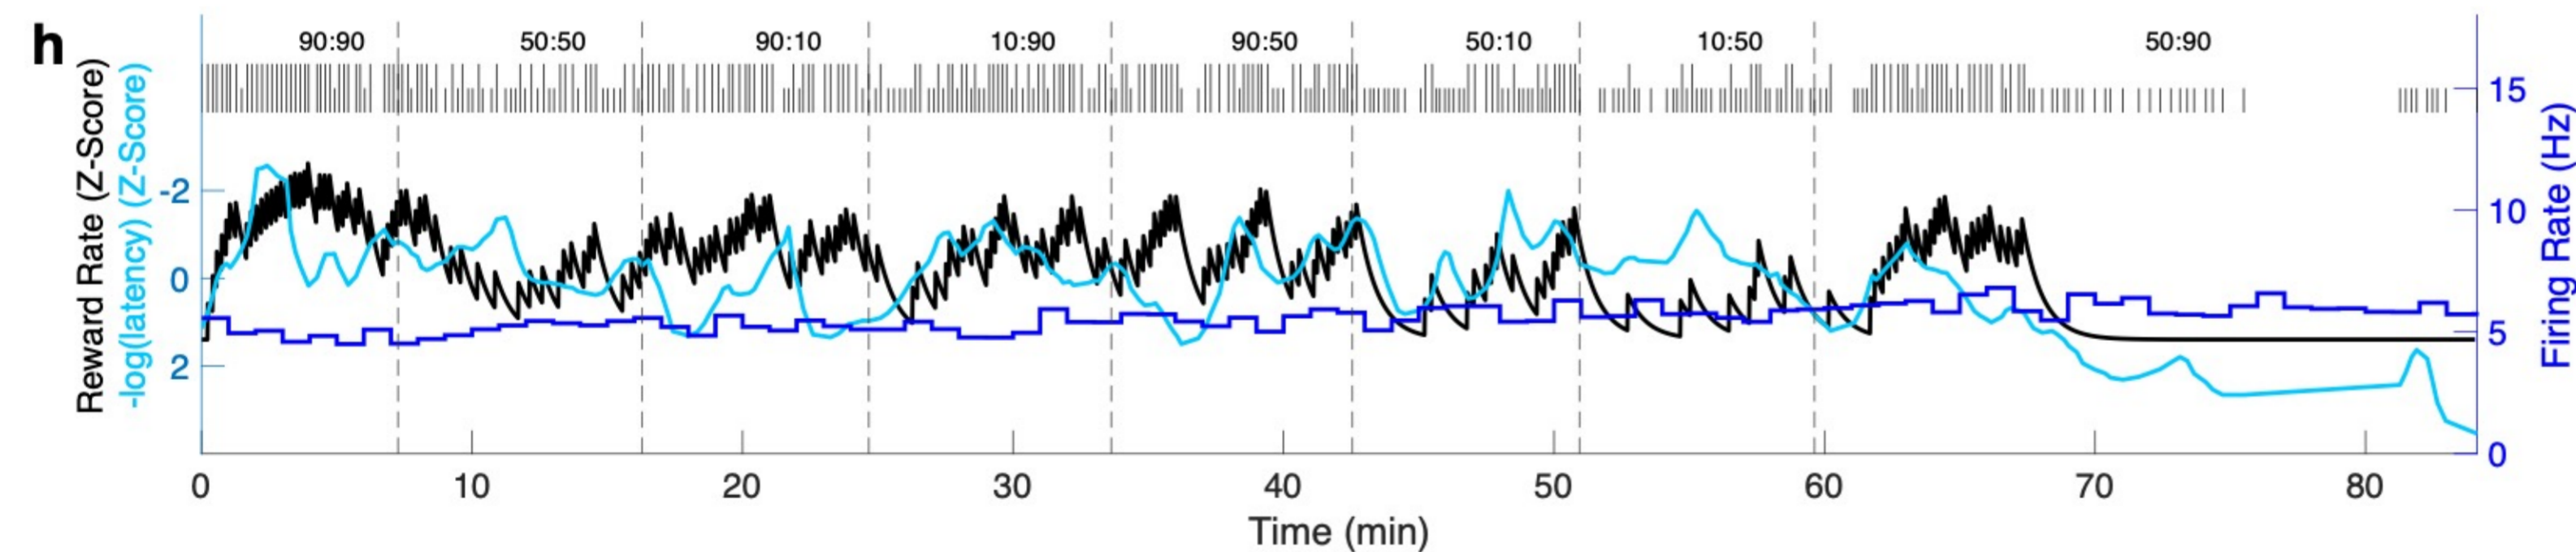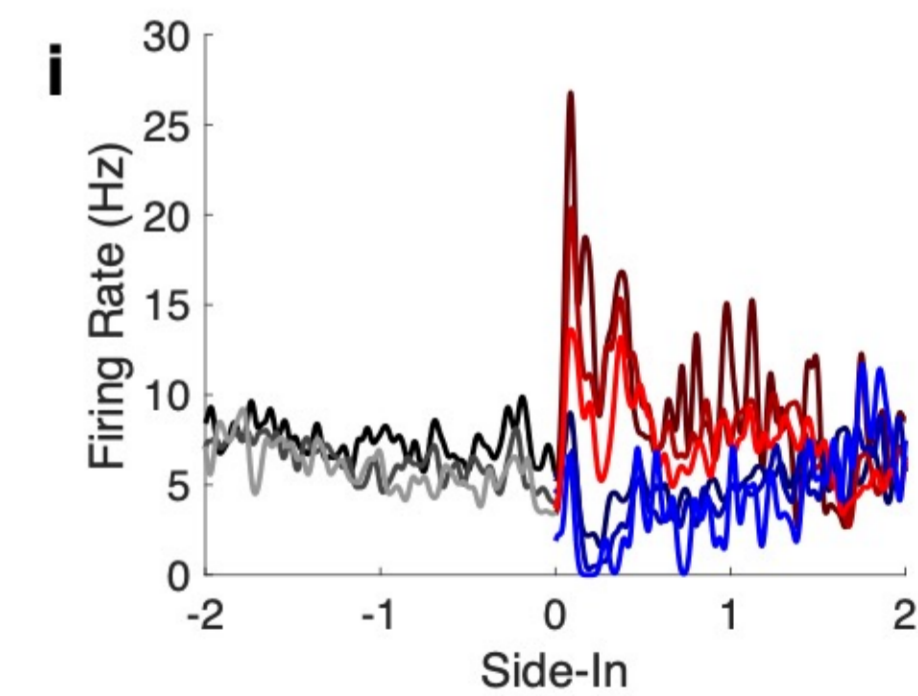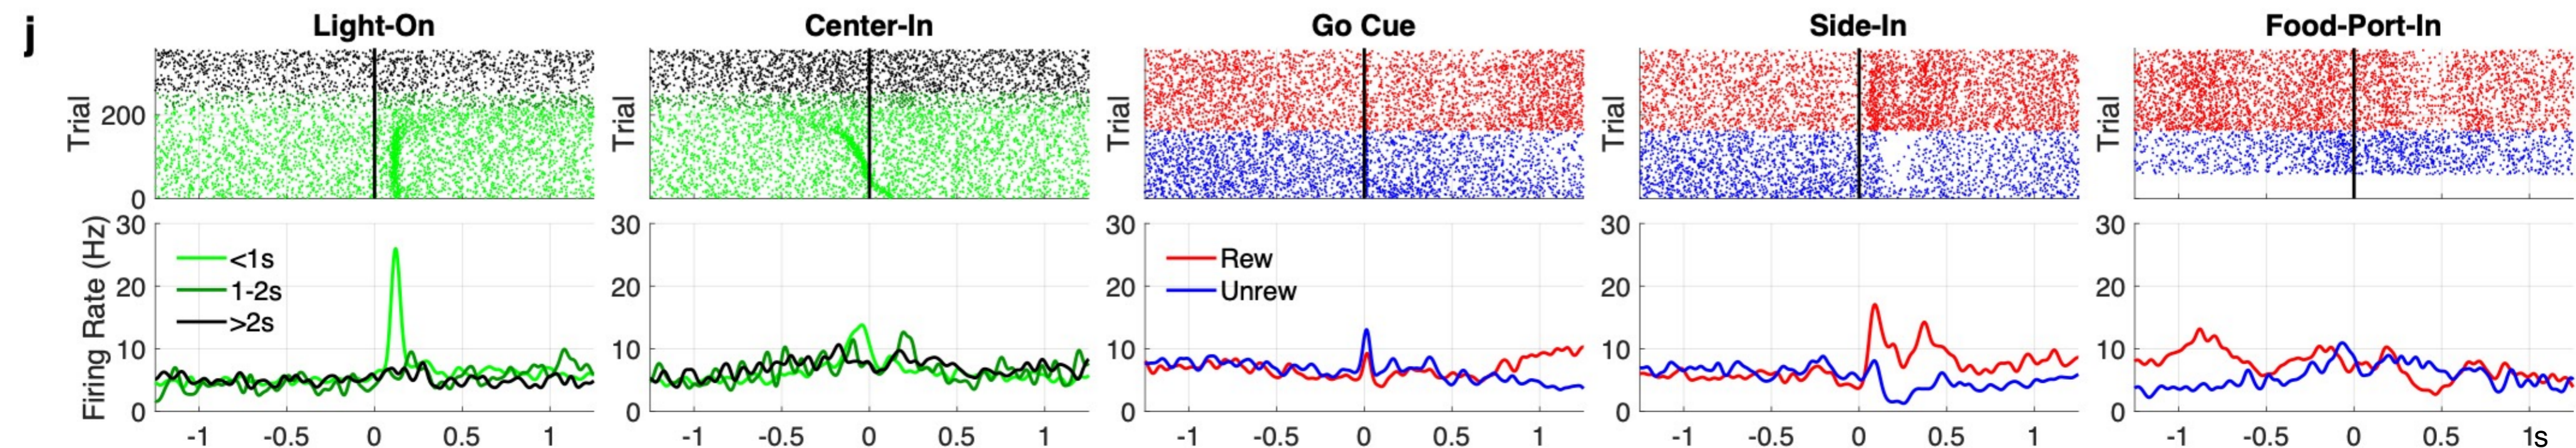

# Neuron properties and Identification

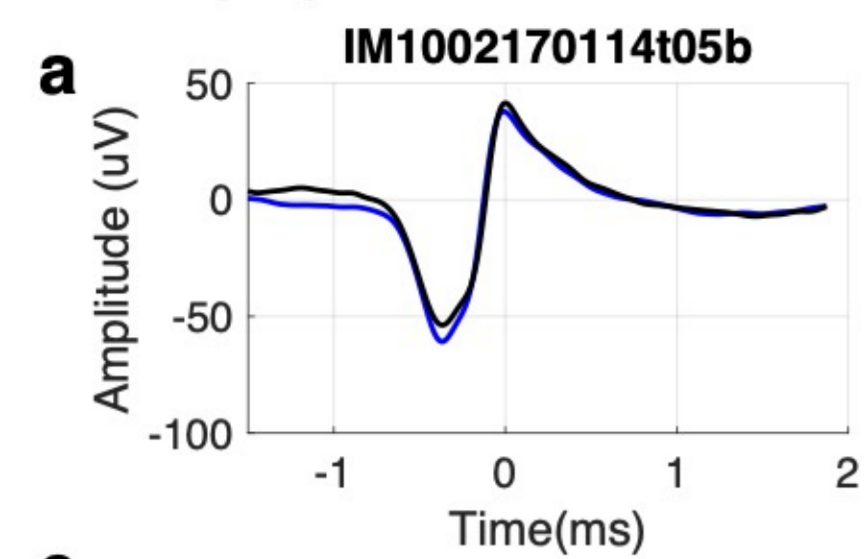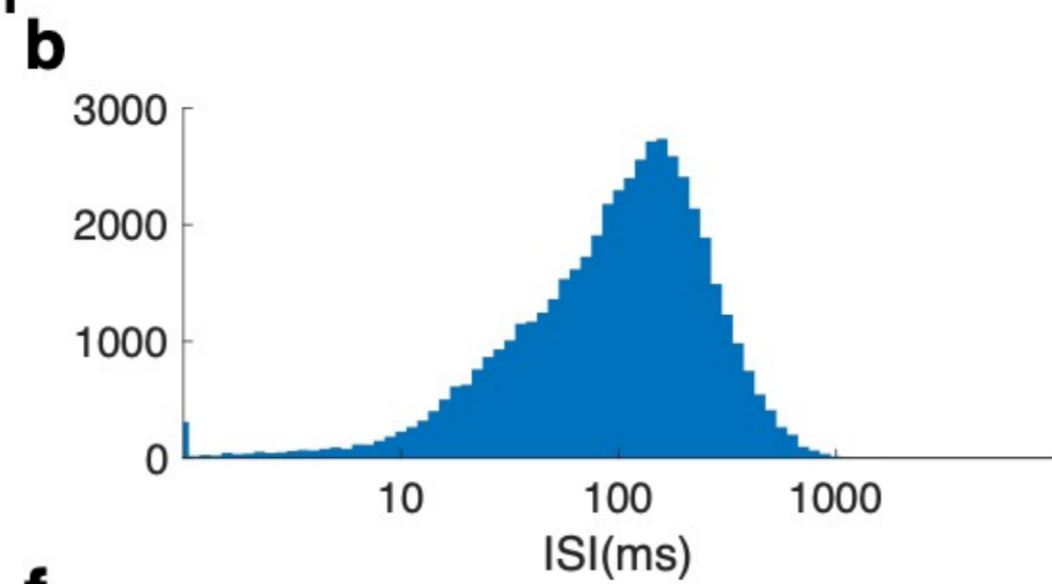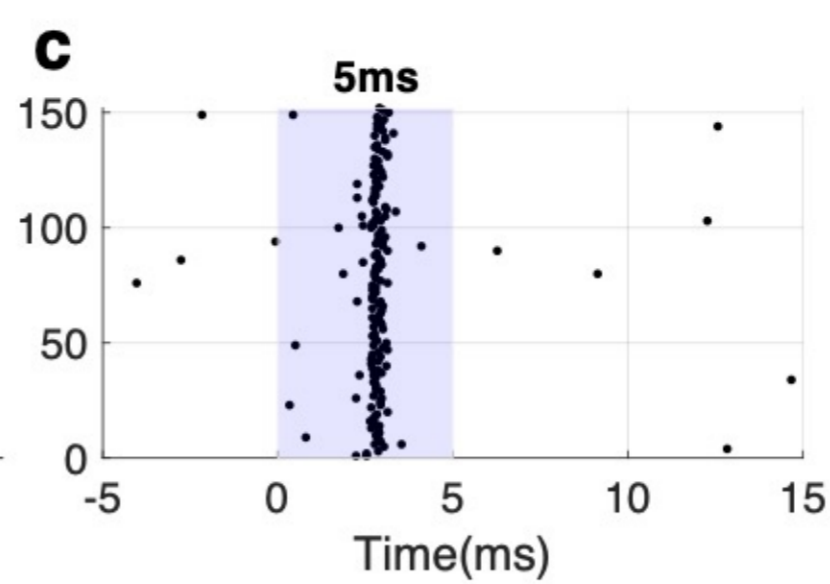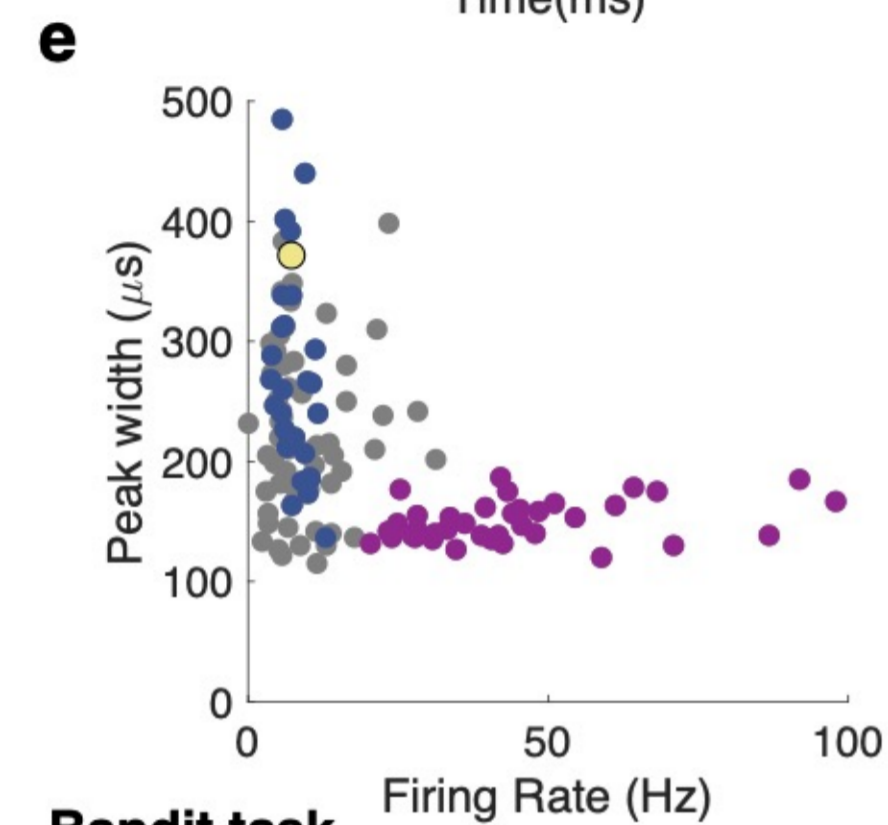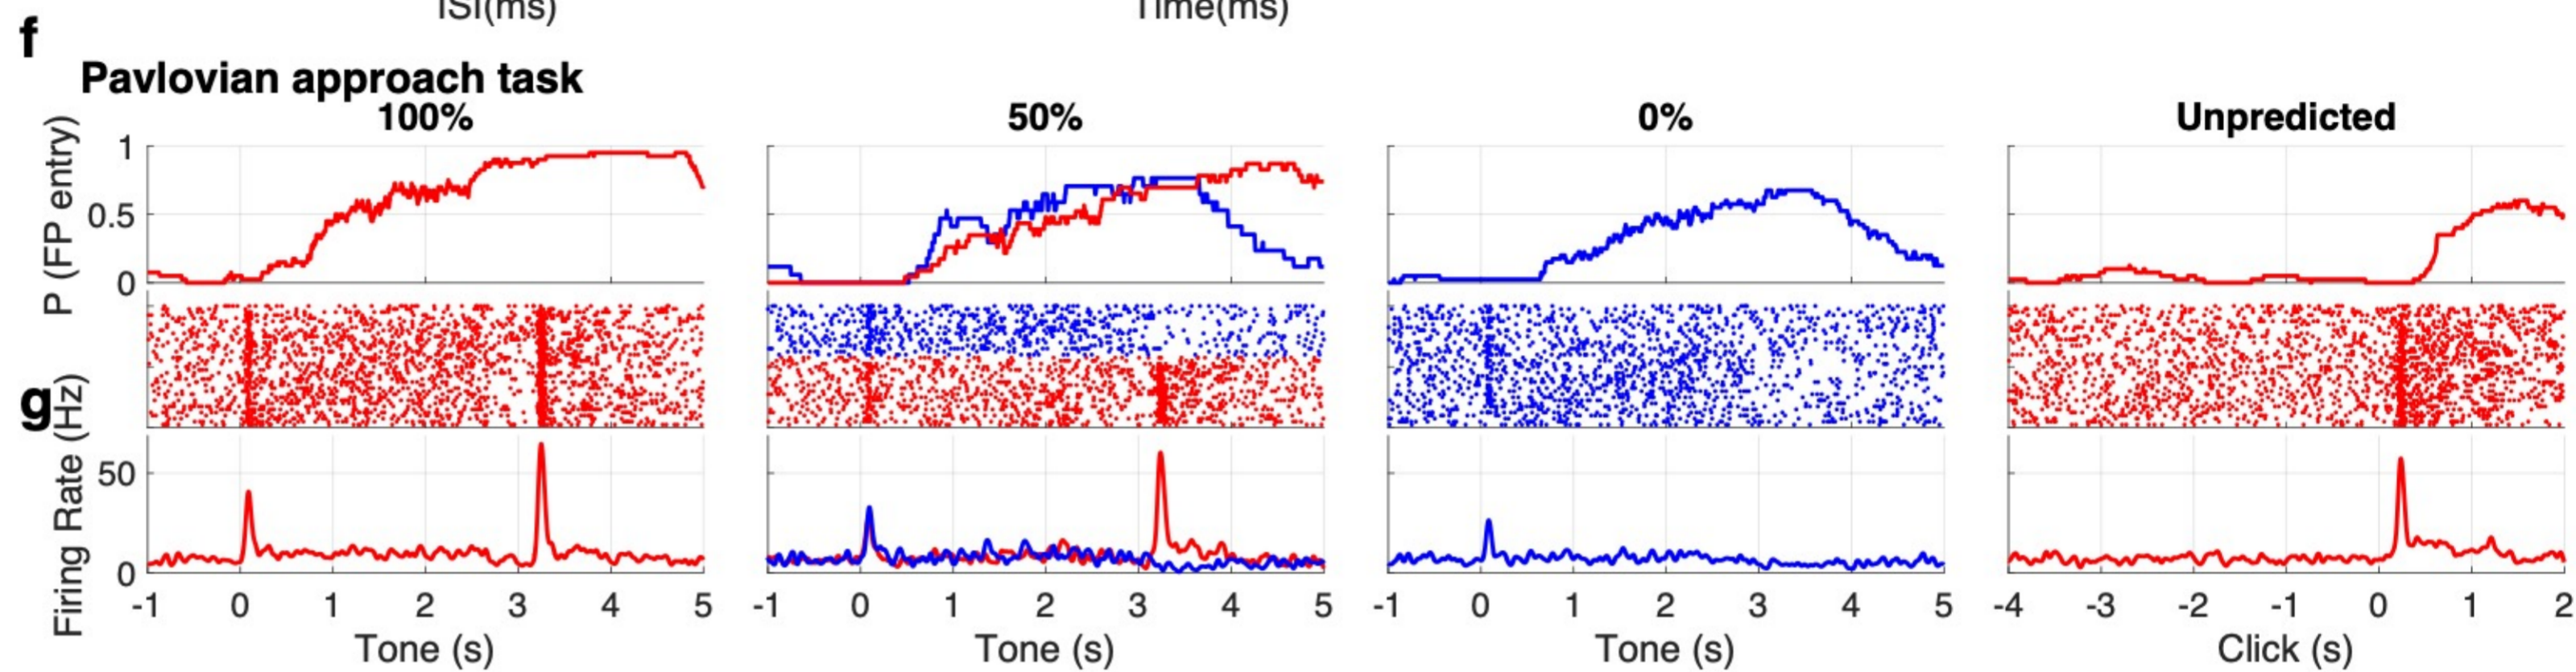

## Bandit task

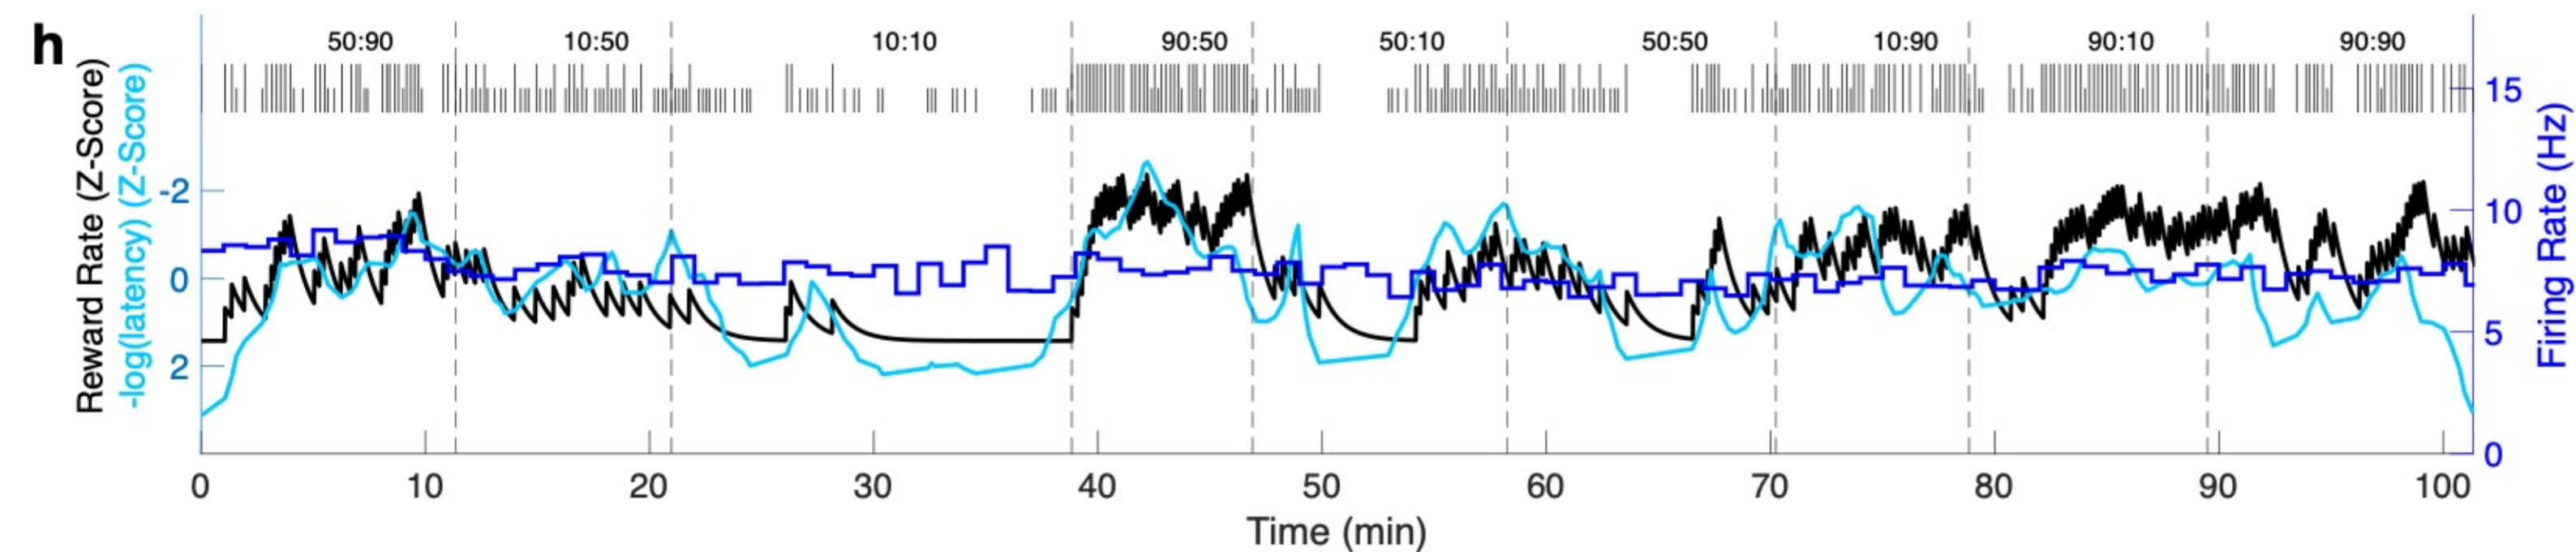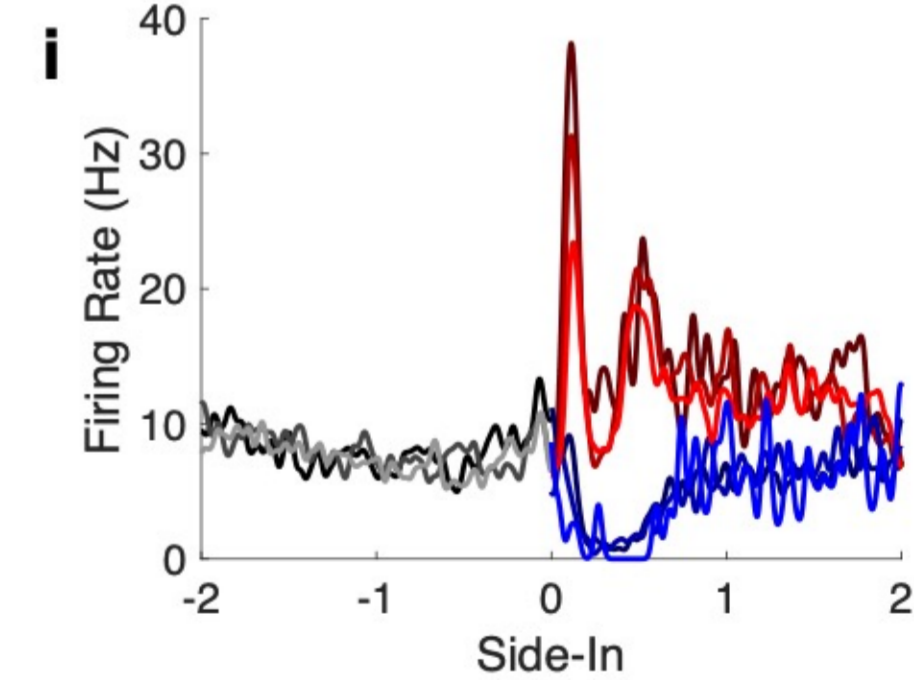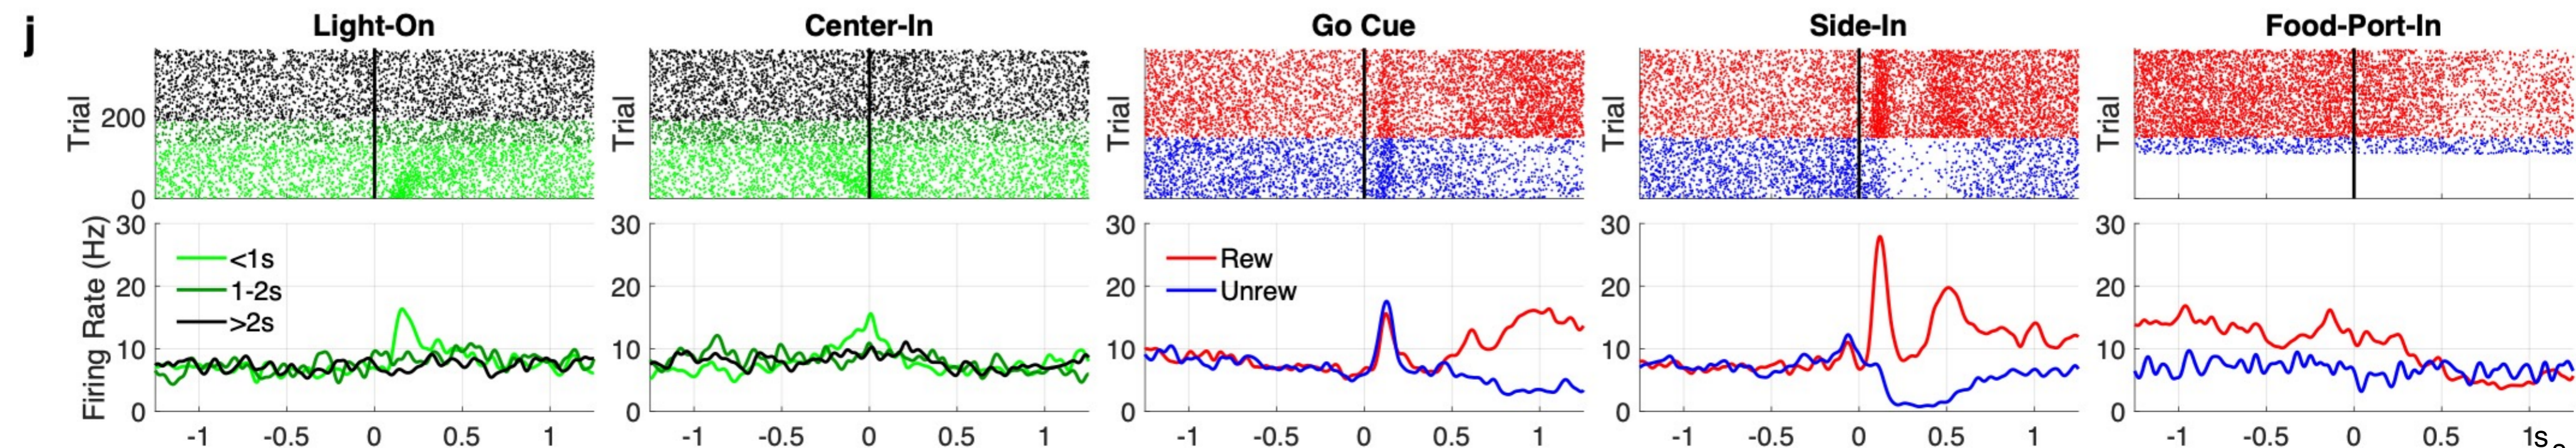

# Neuron properties and Identification

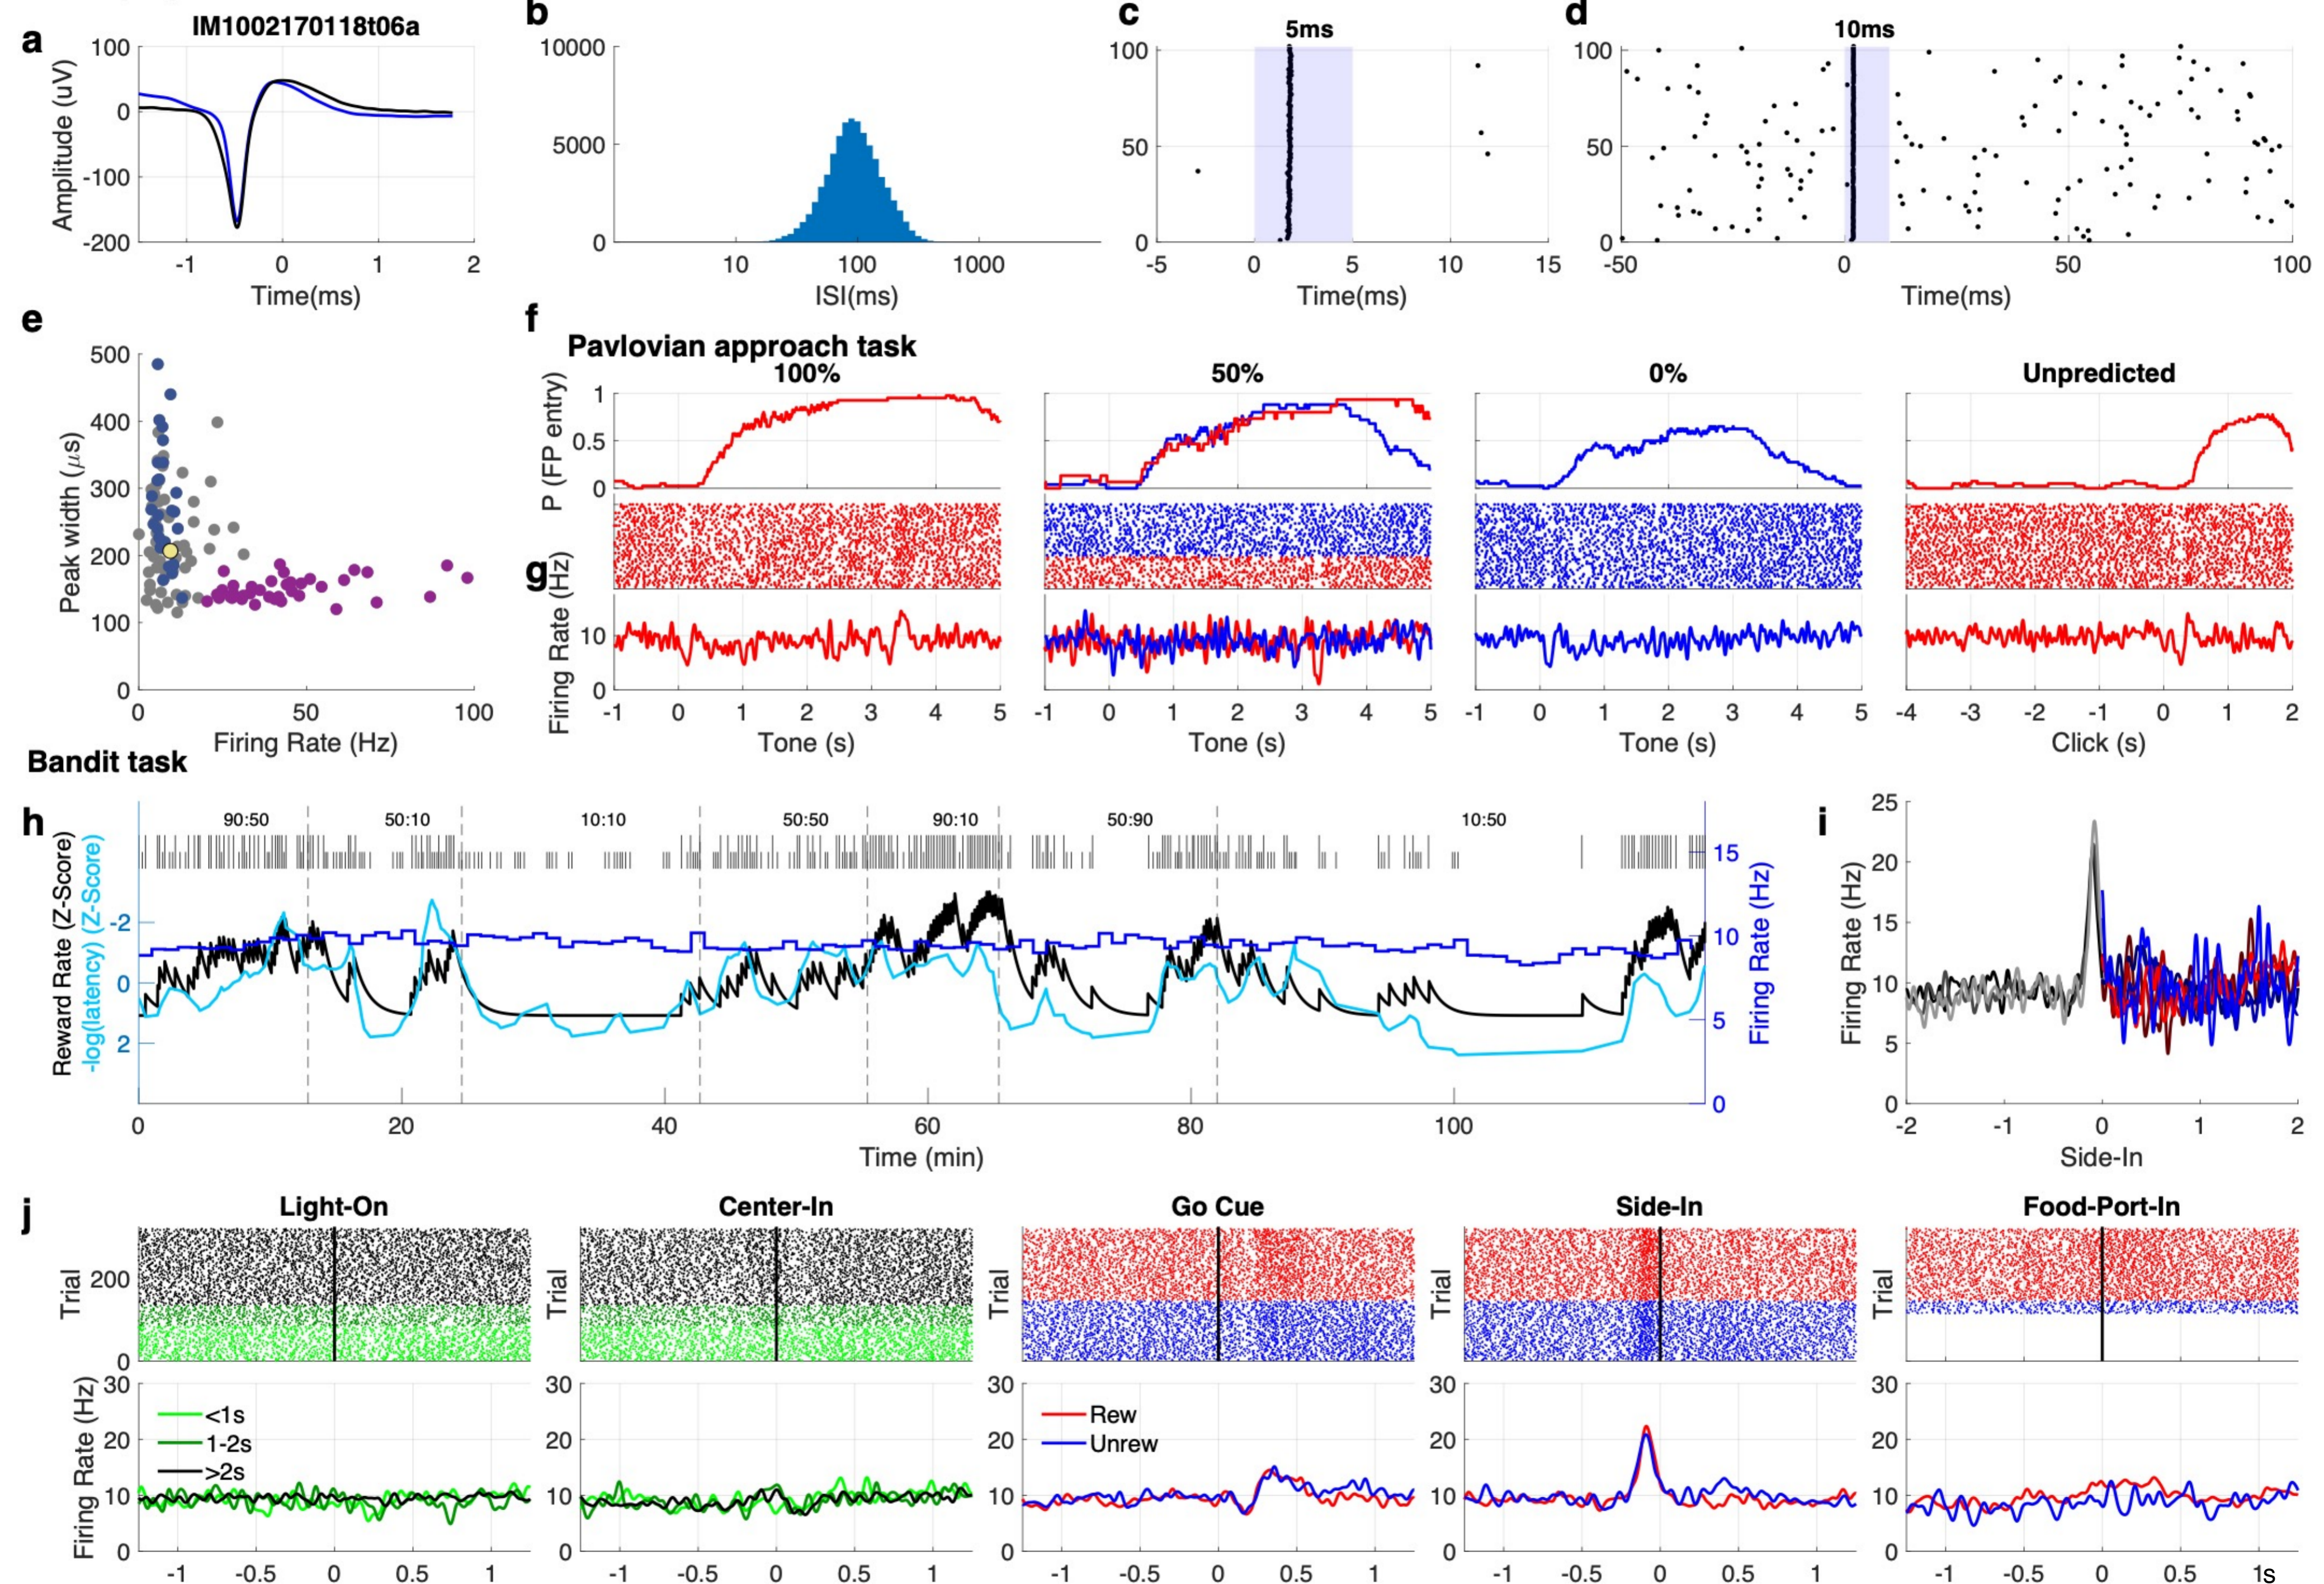

# Neuron properties and Identification

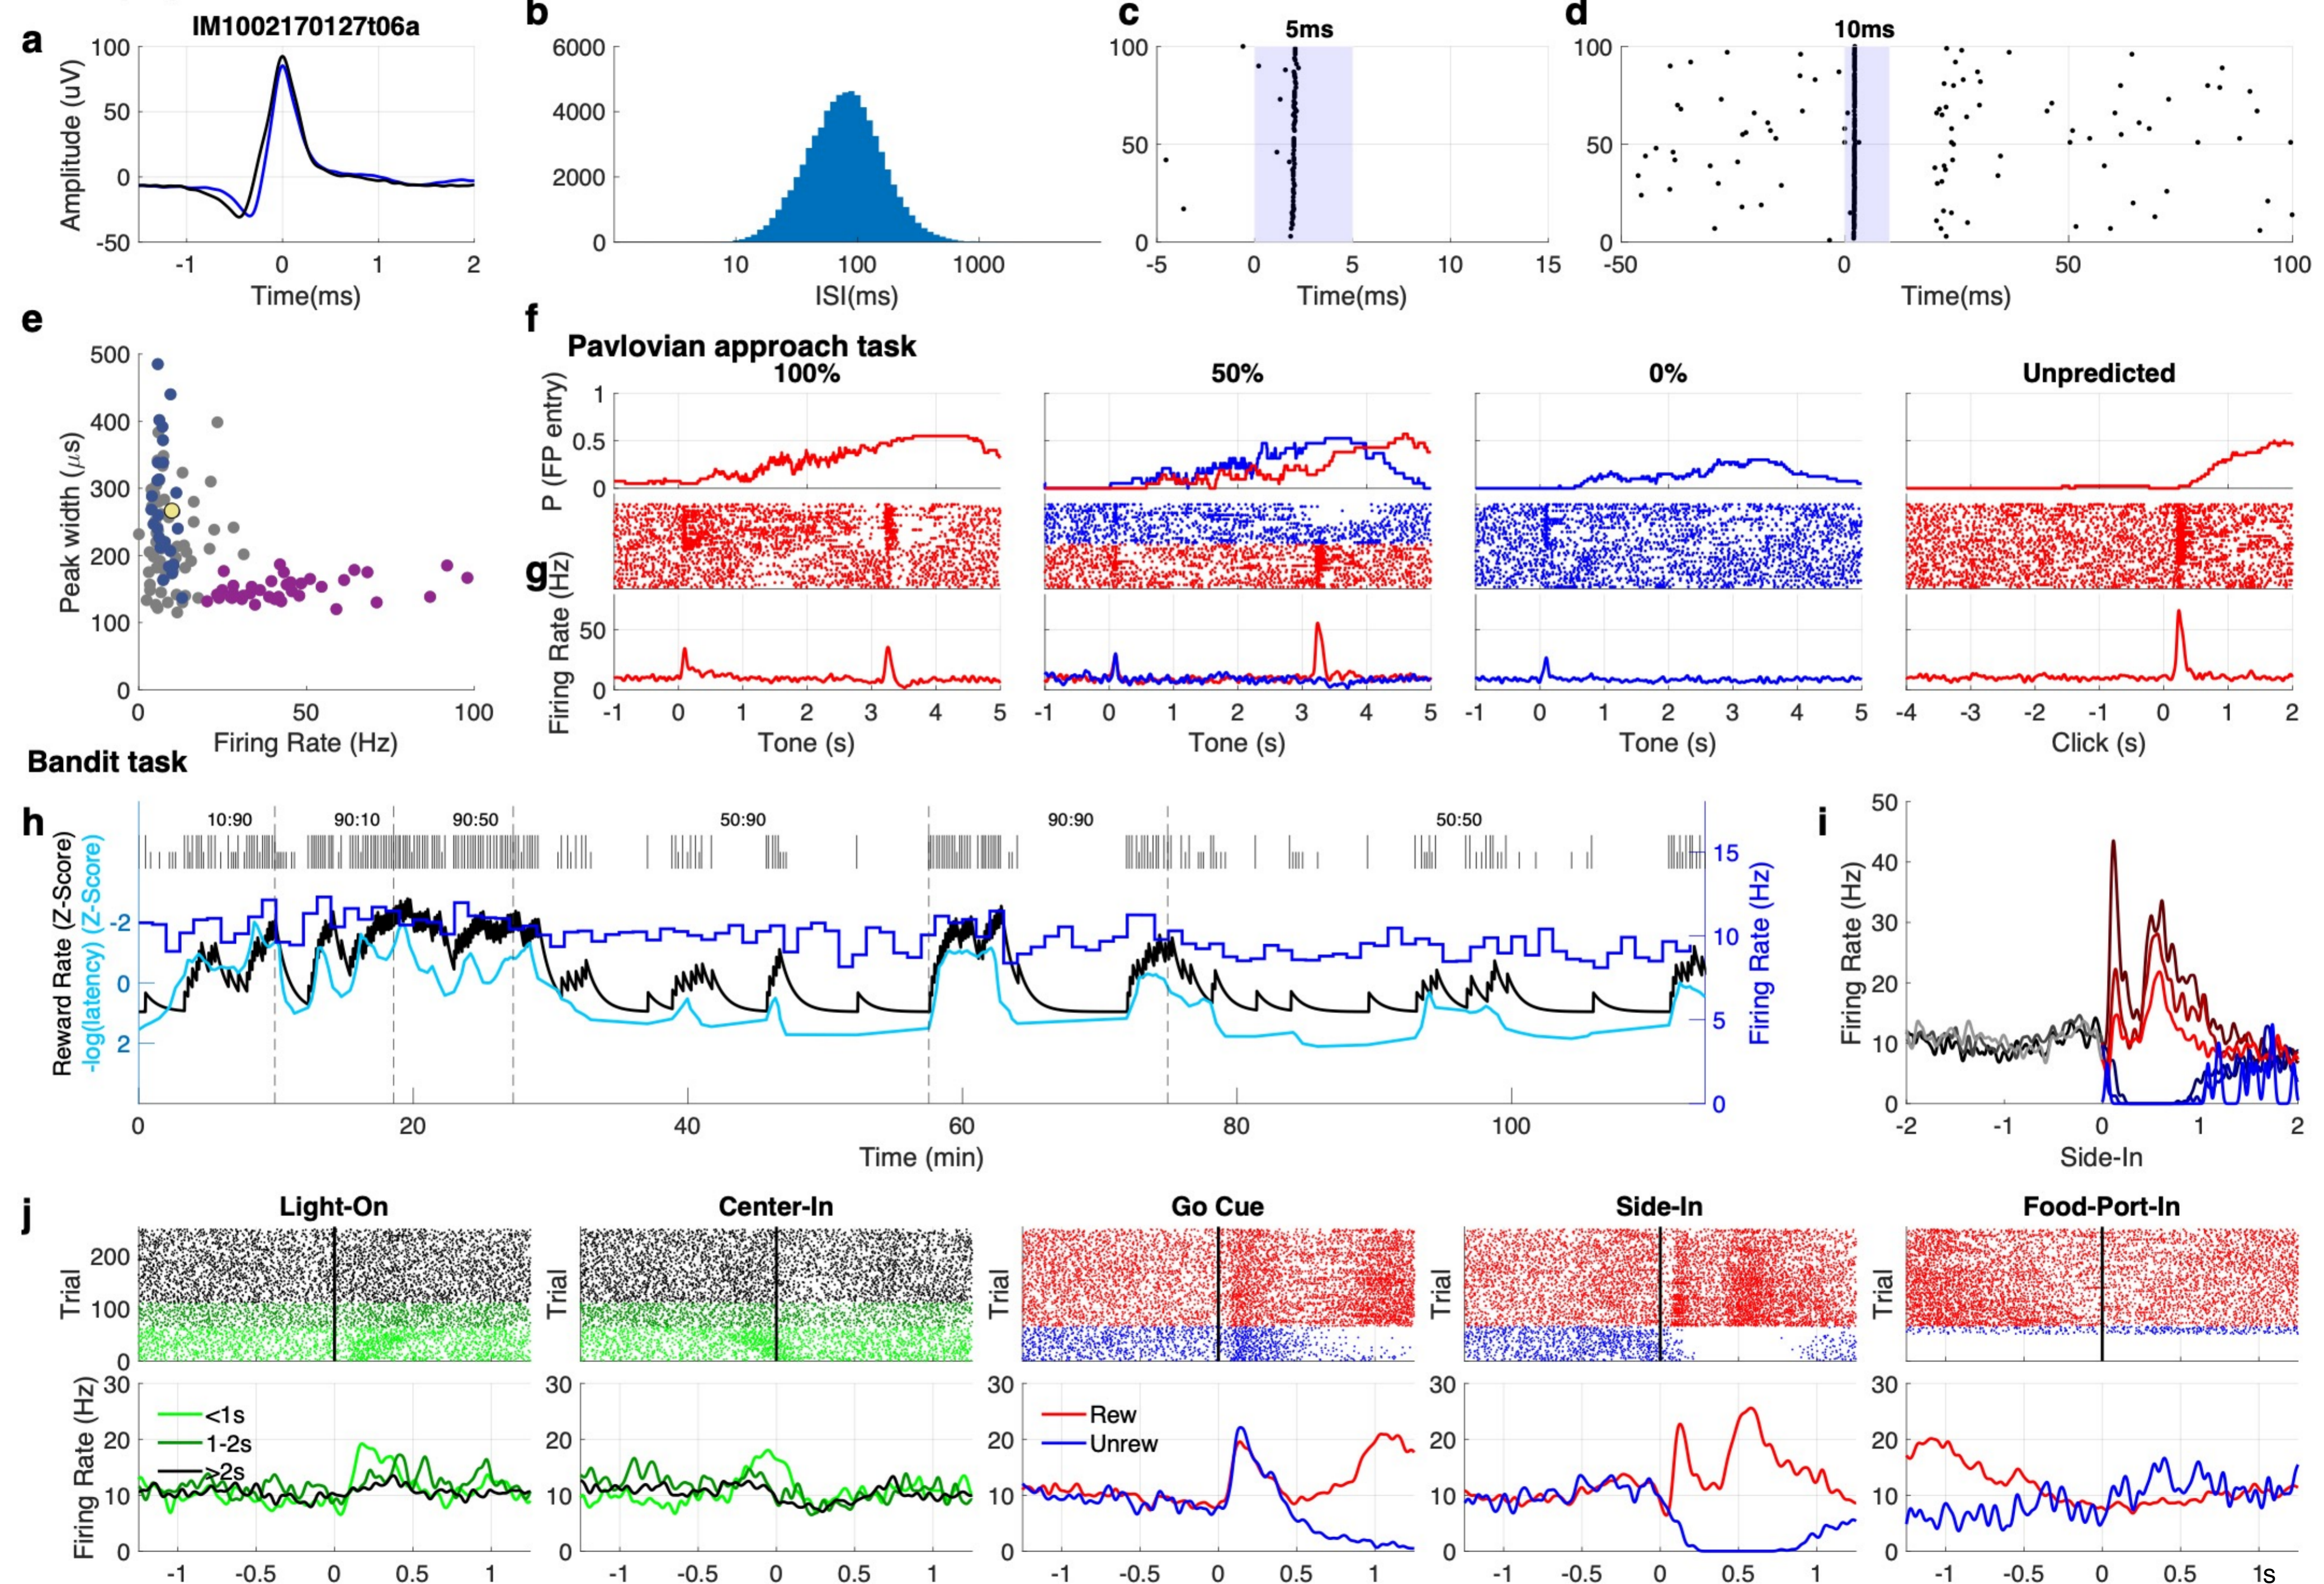

# Neuron properties and Identification

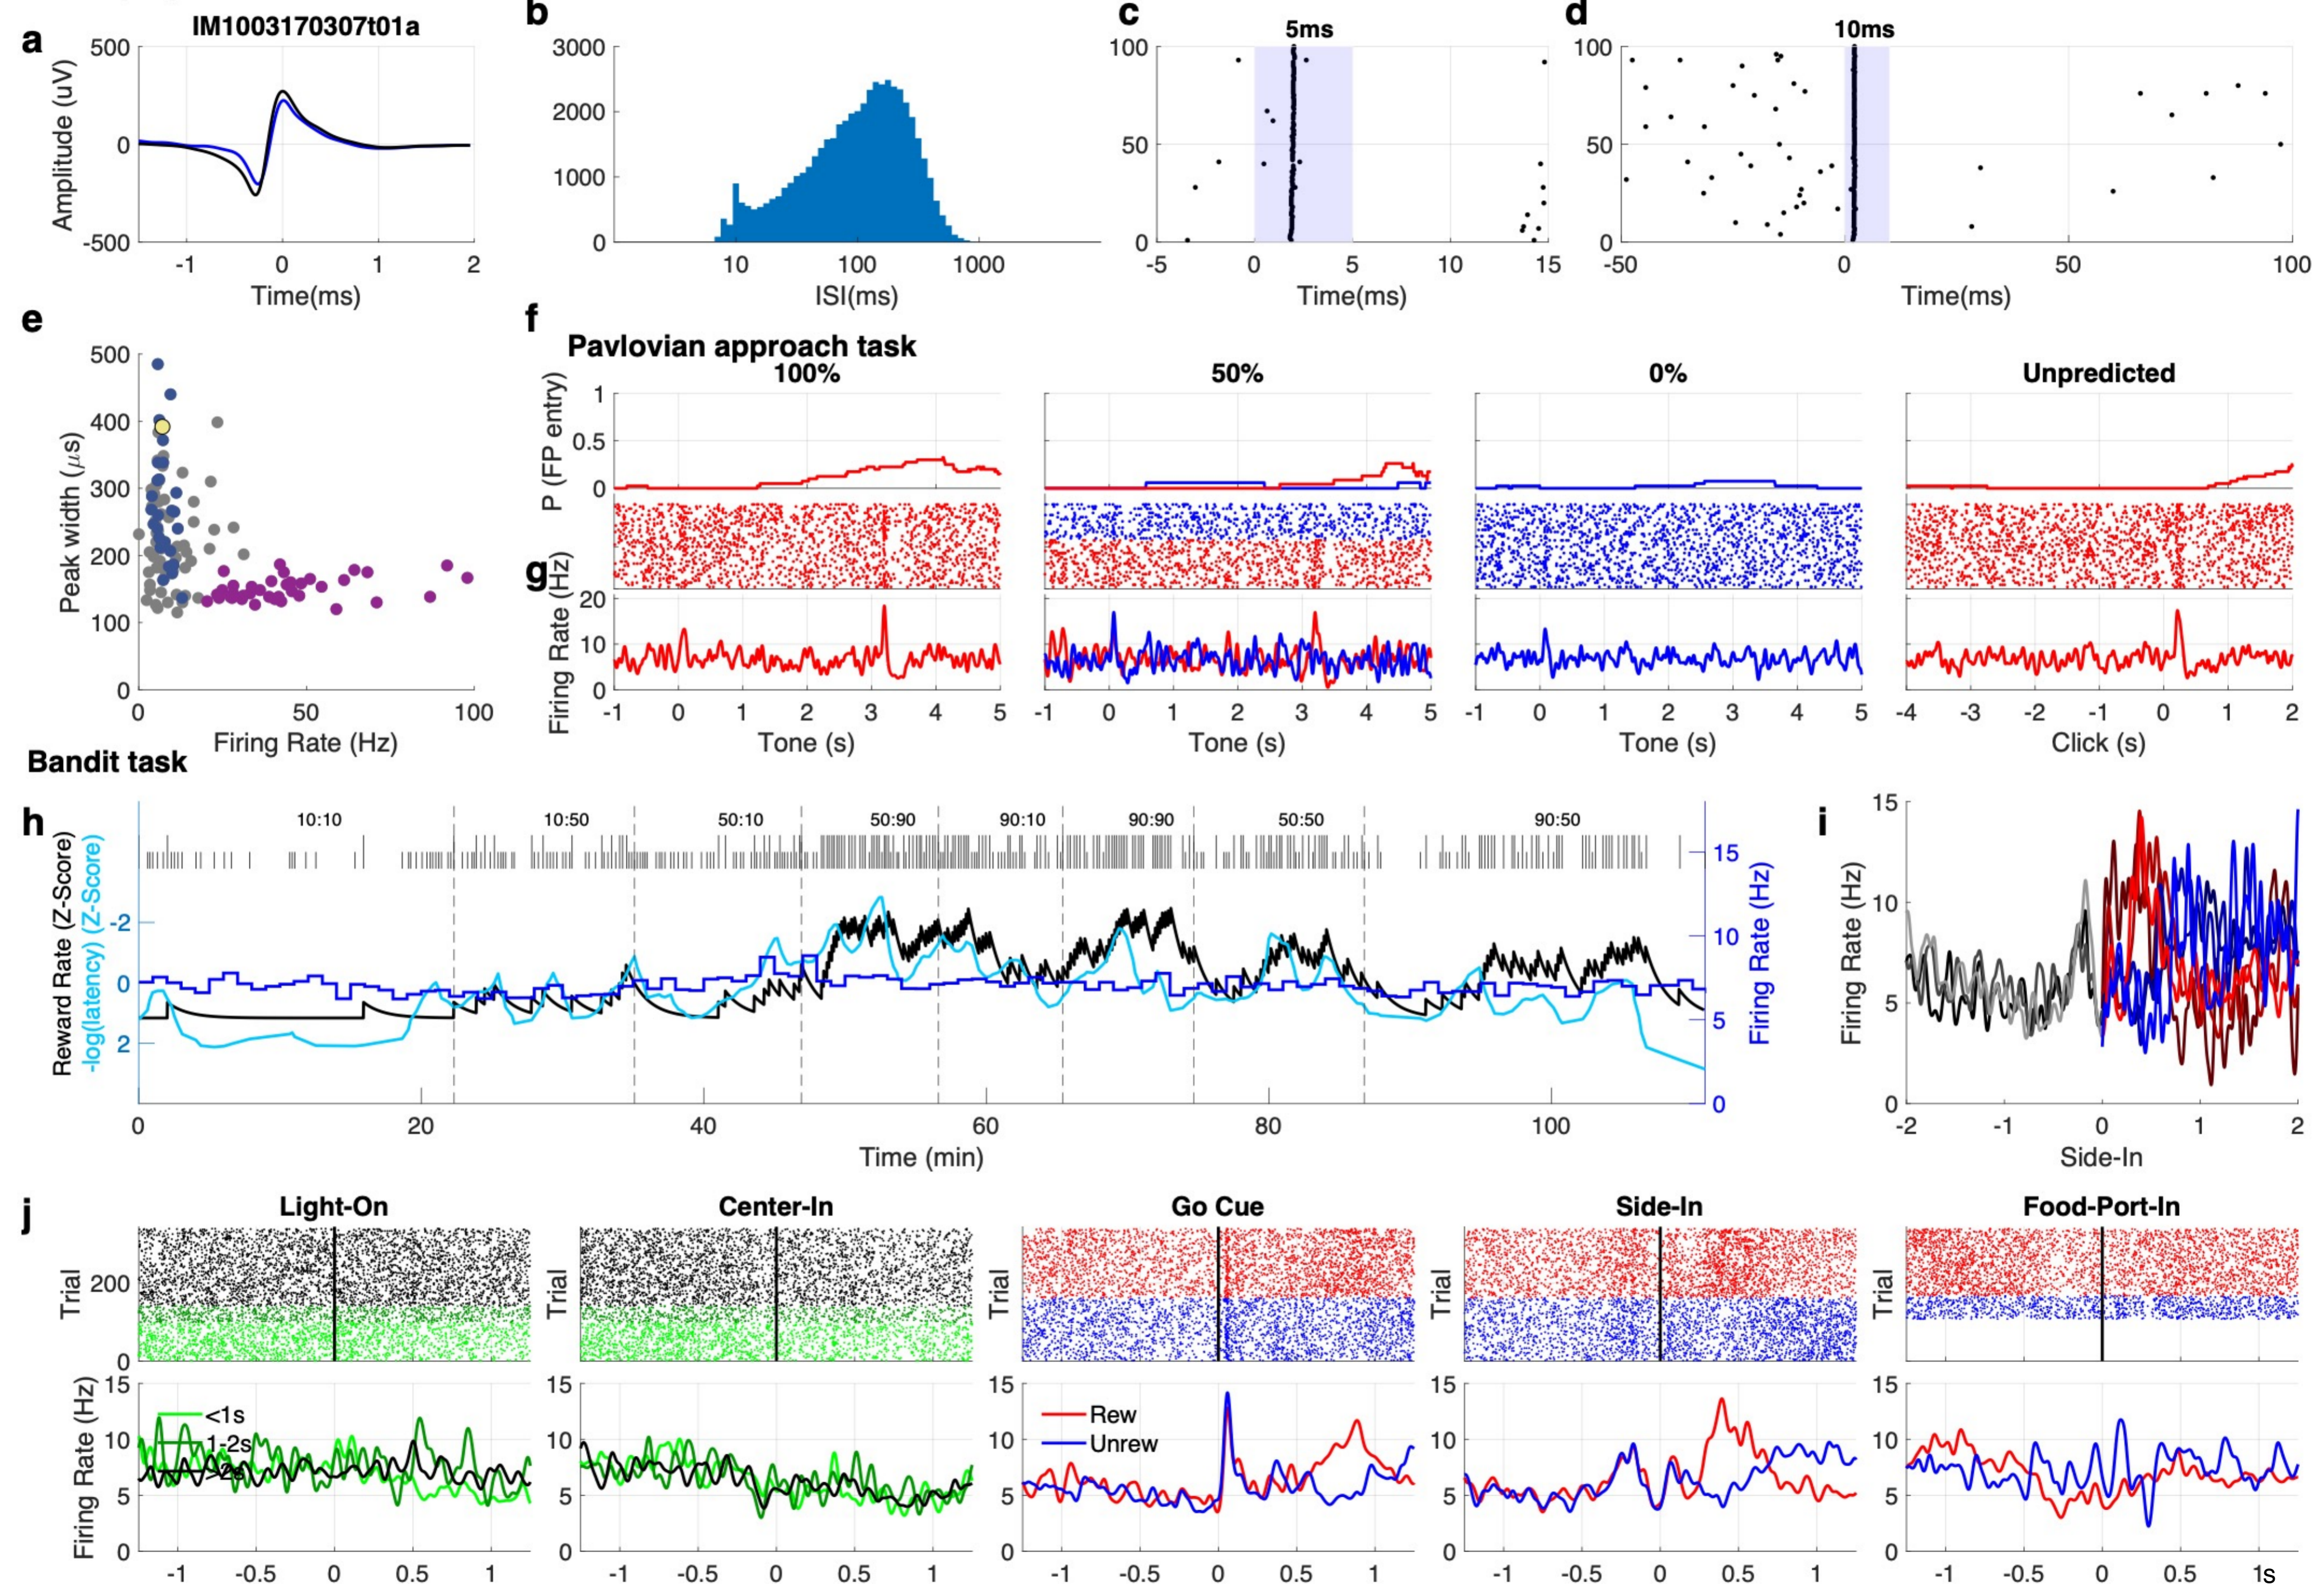

# Neuron properties and Identification

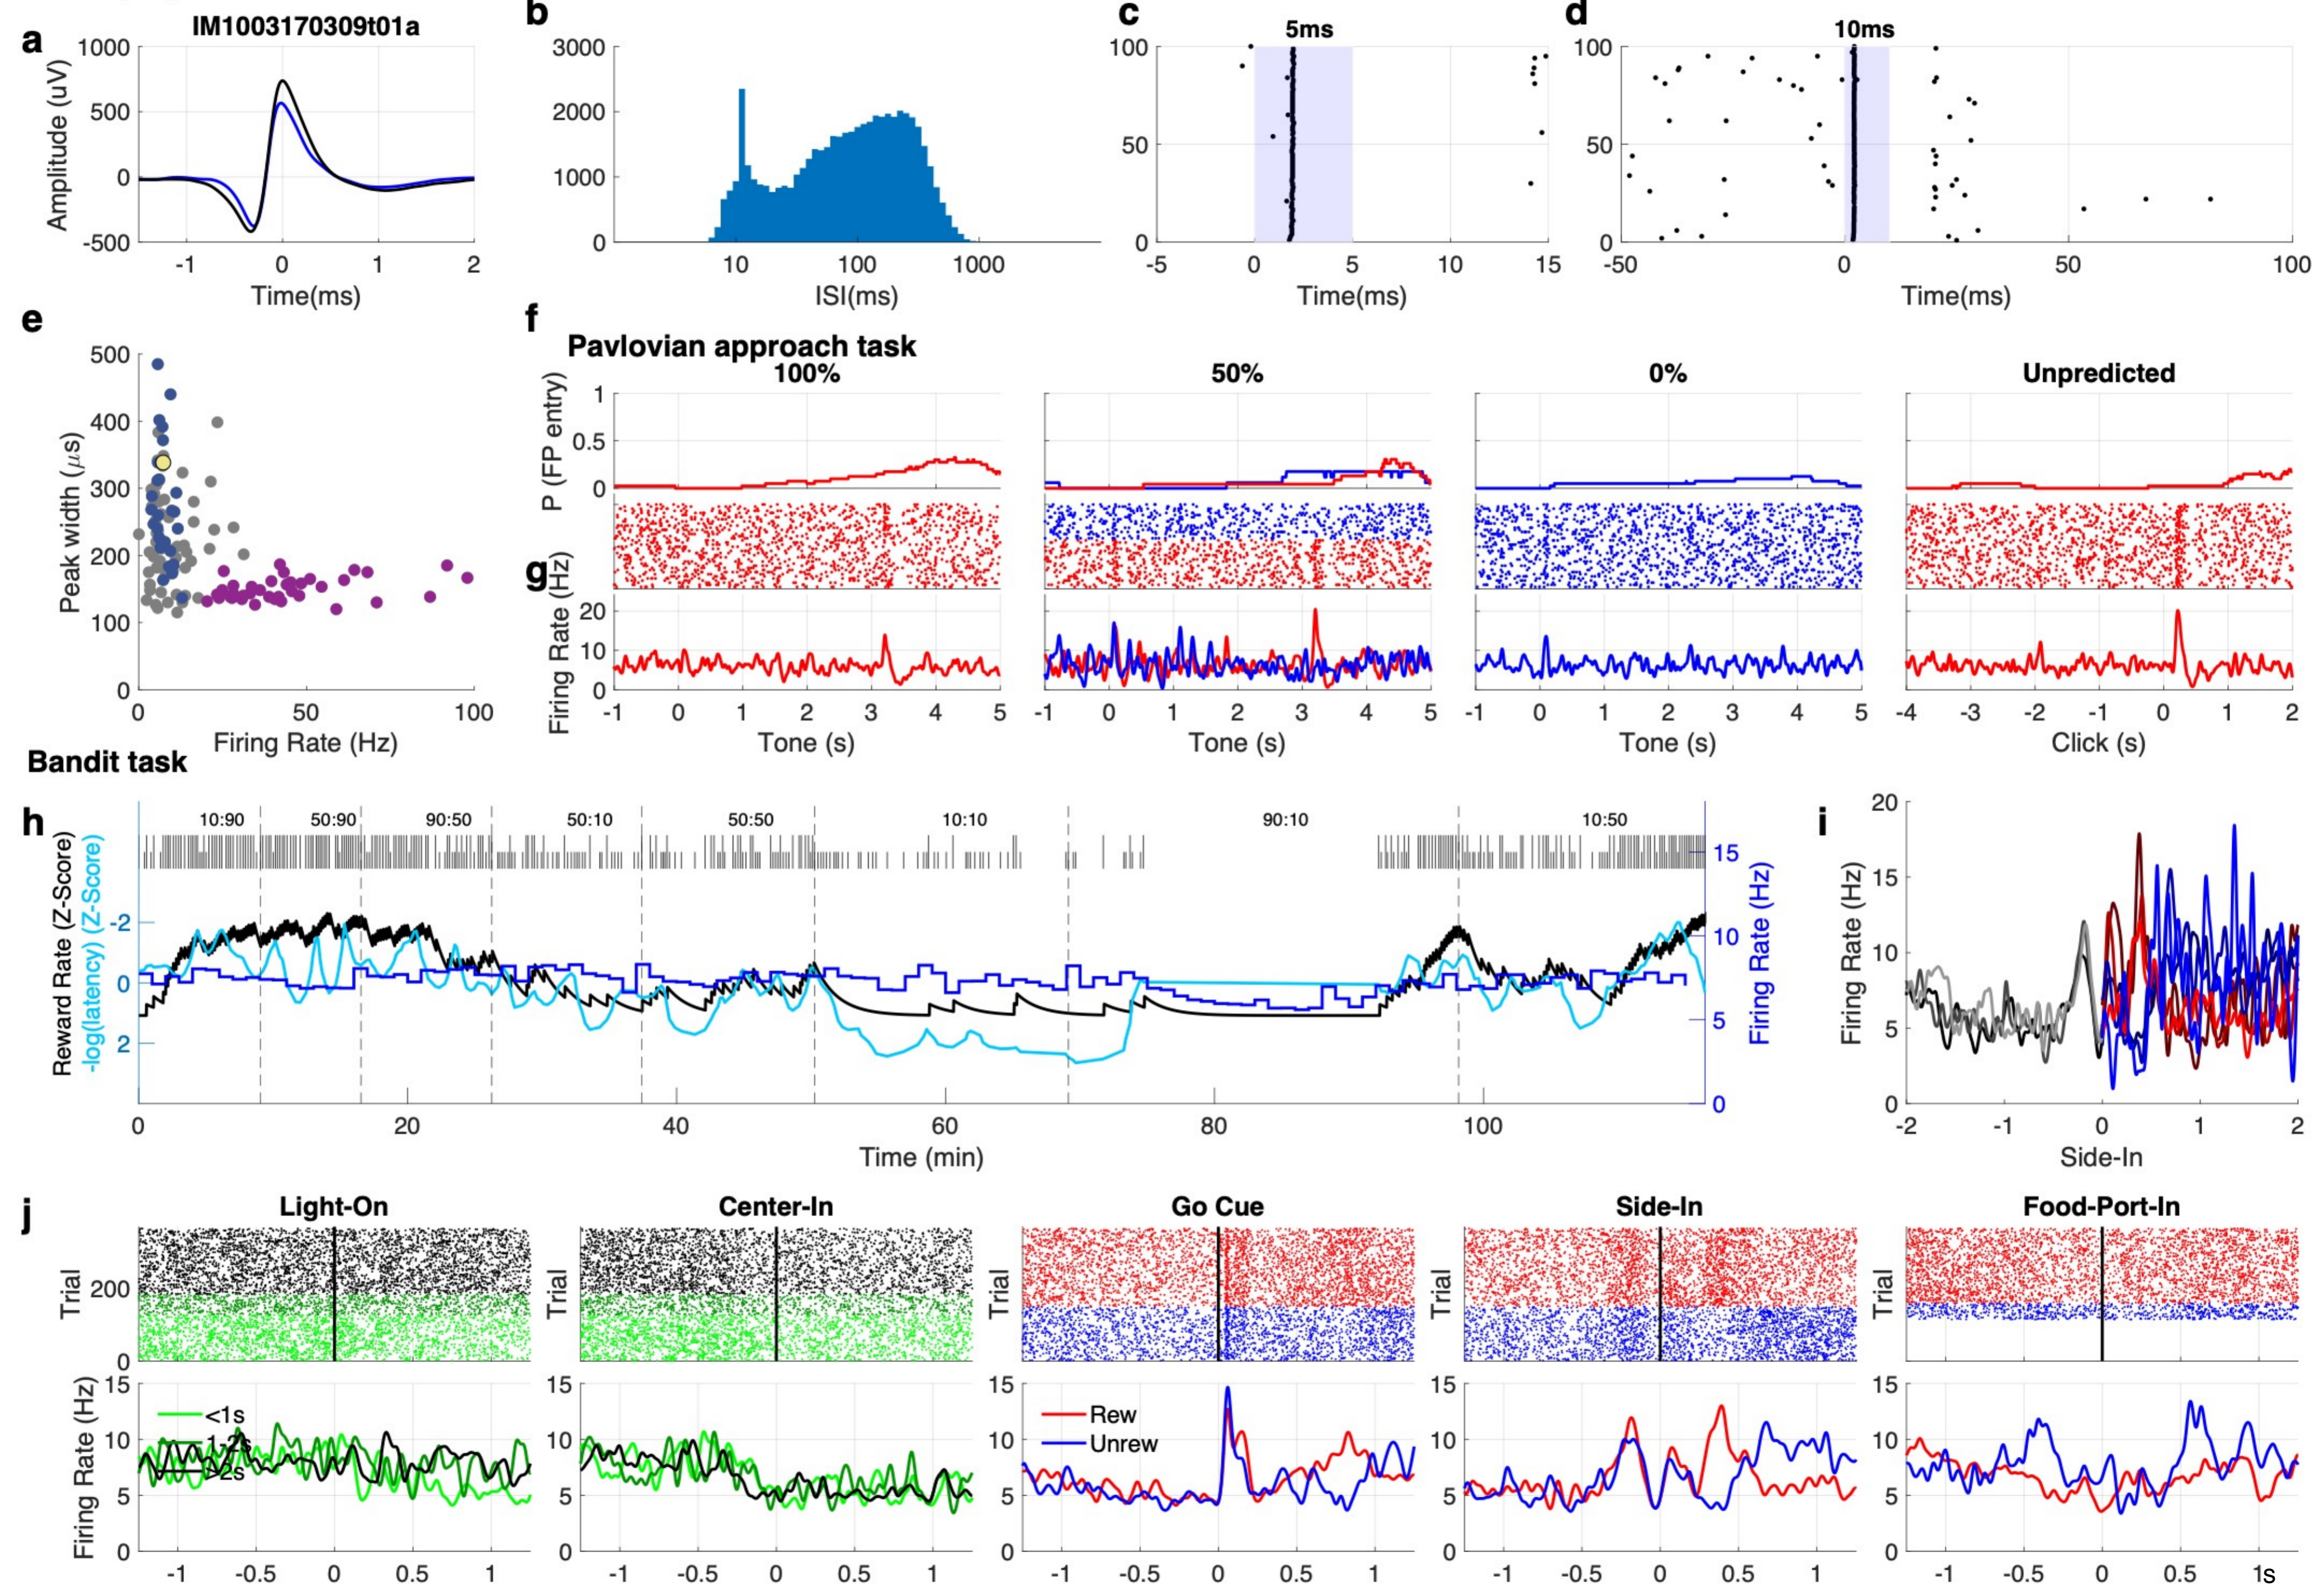

# Neuron properties and Identification

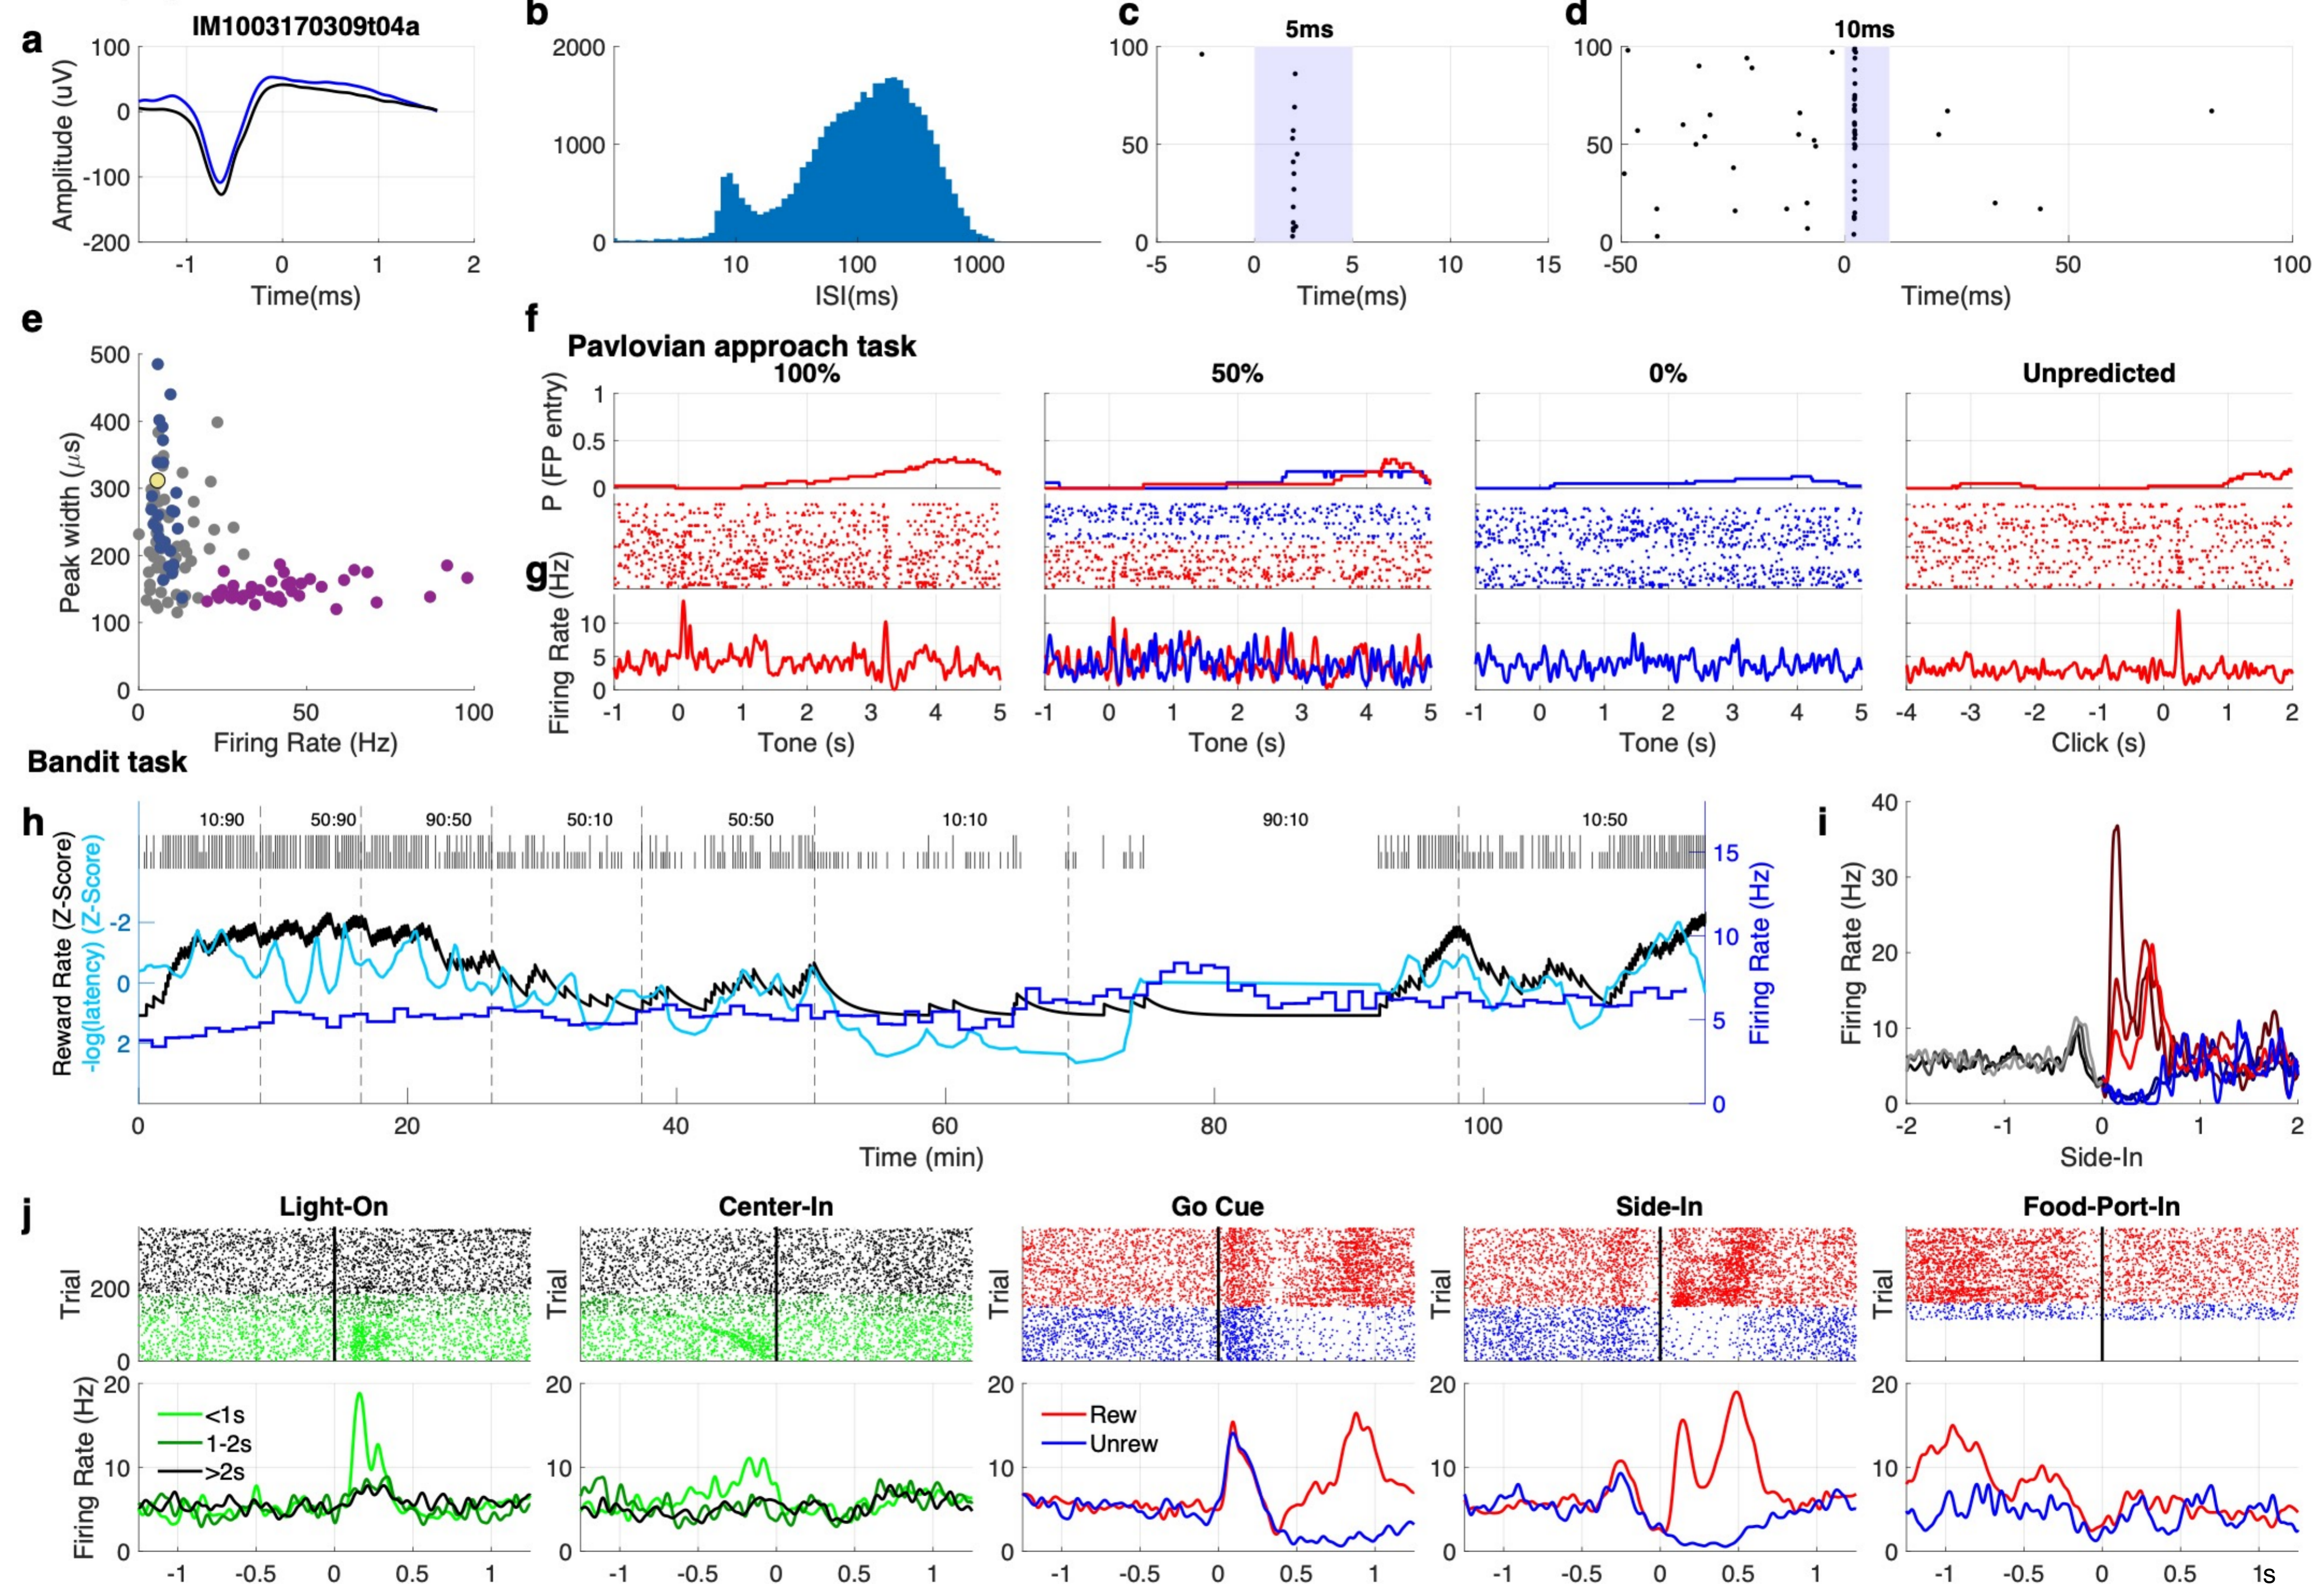

# Neuron properties and Identification

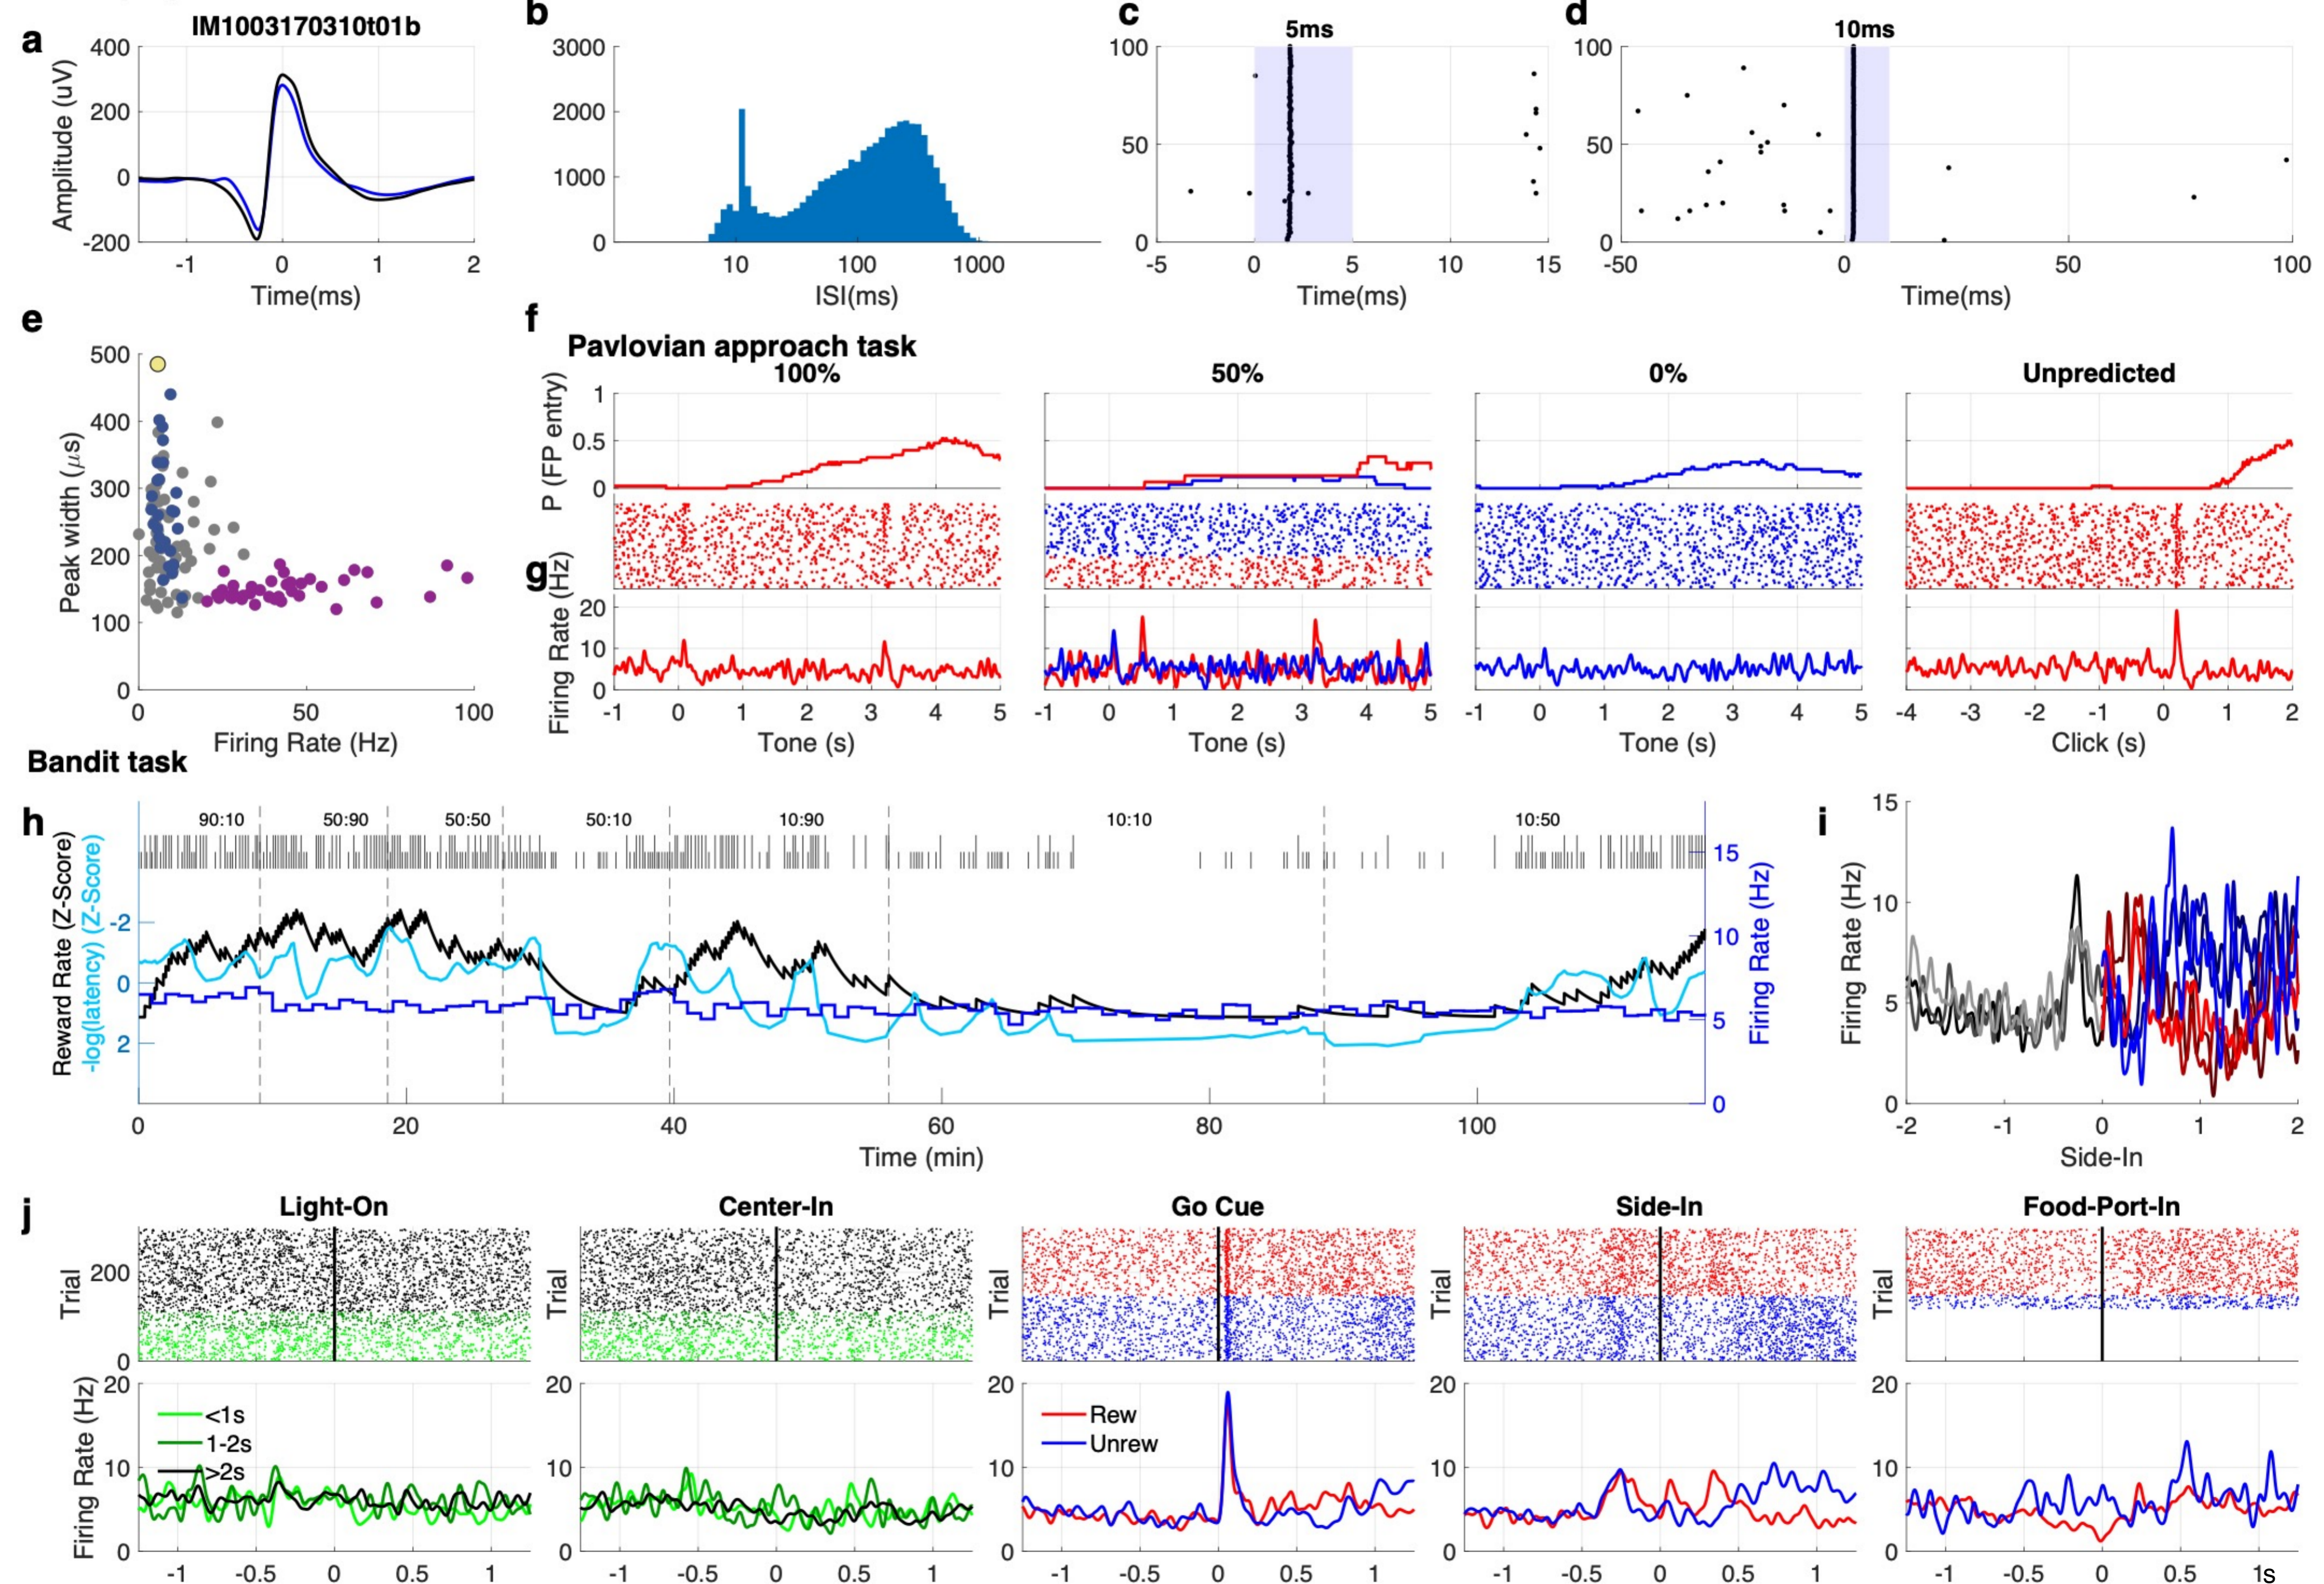



# Neuron properties and Identification

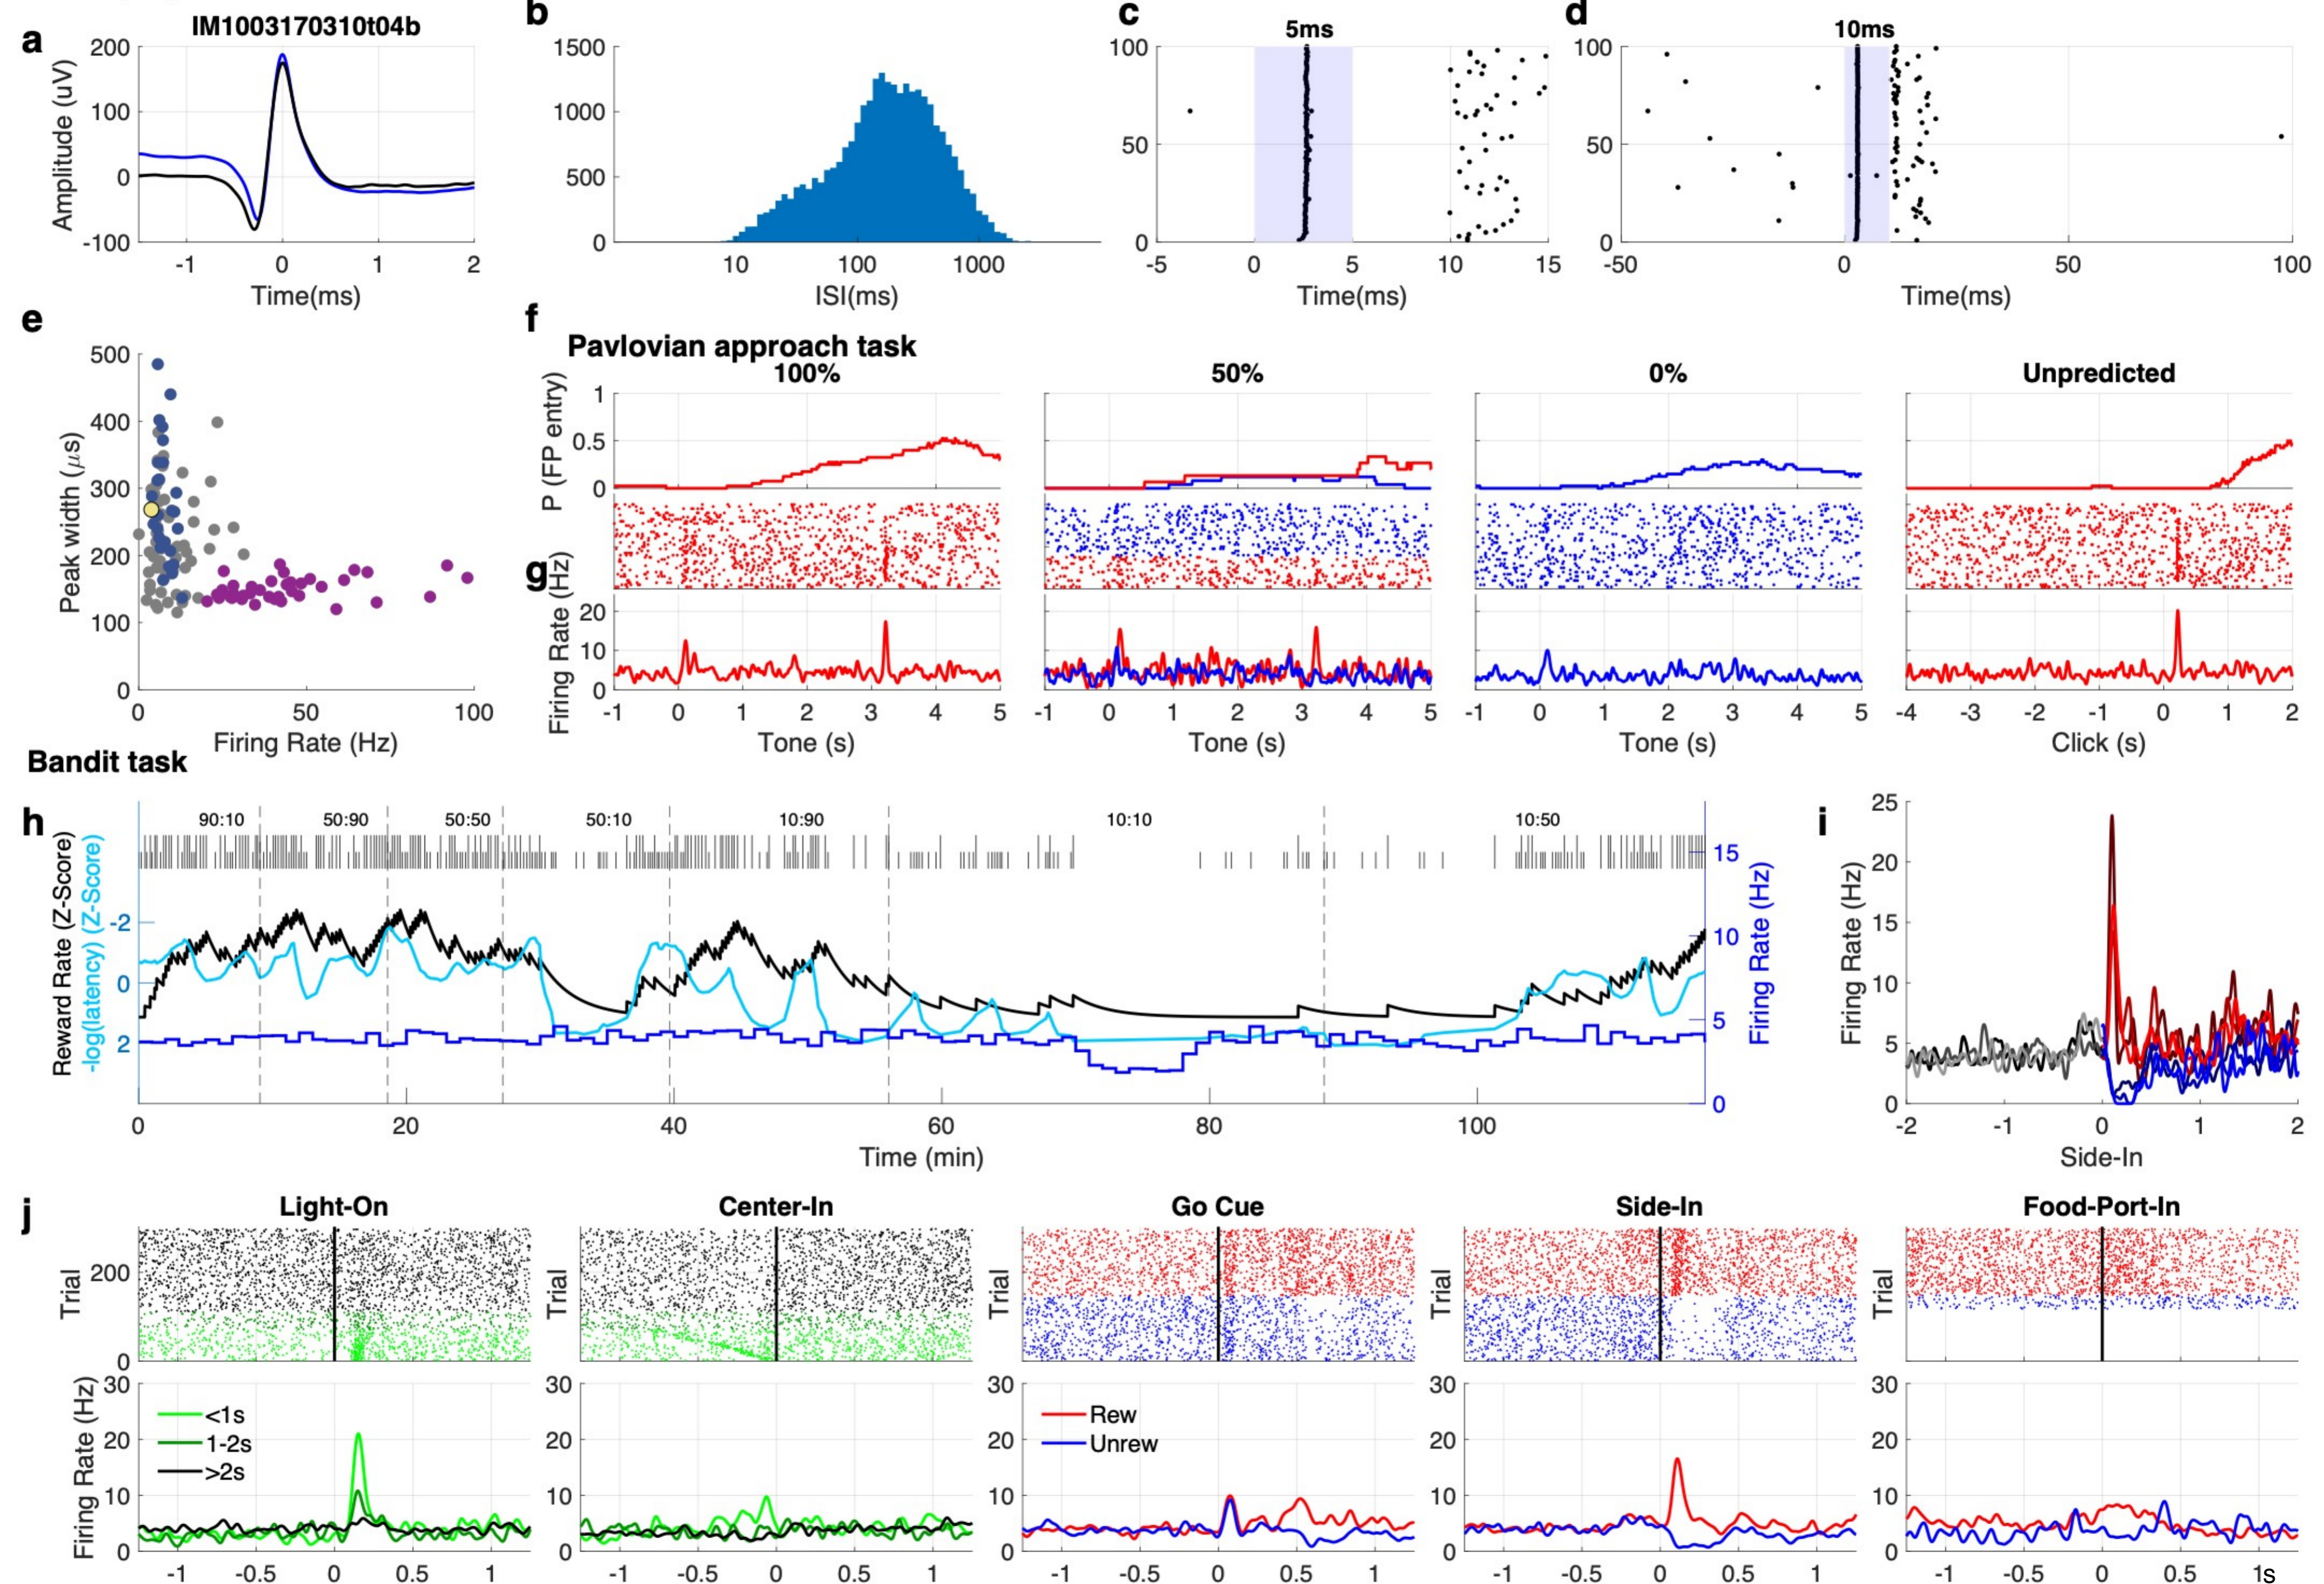

# Neuron properties and Identification

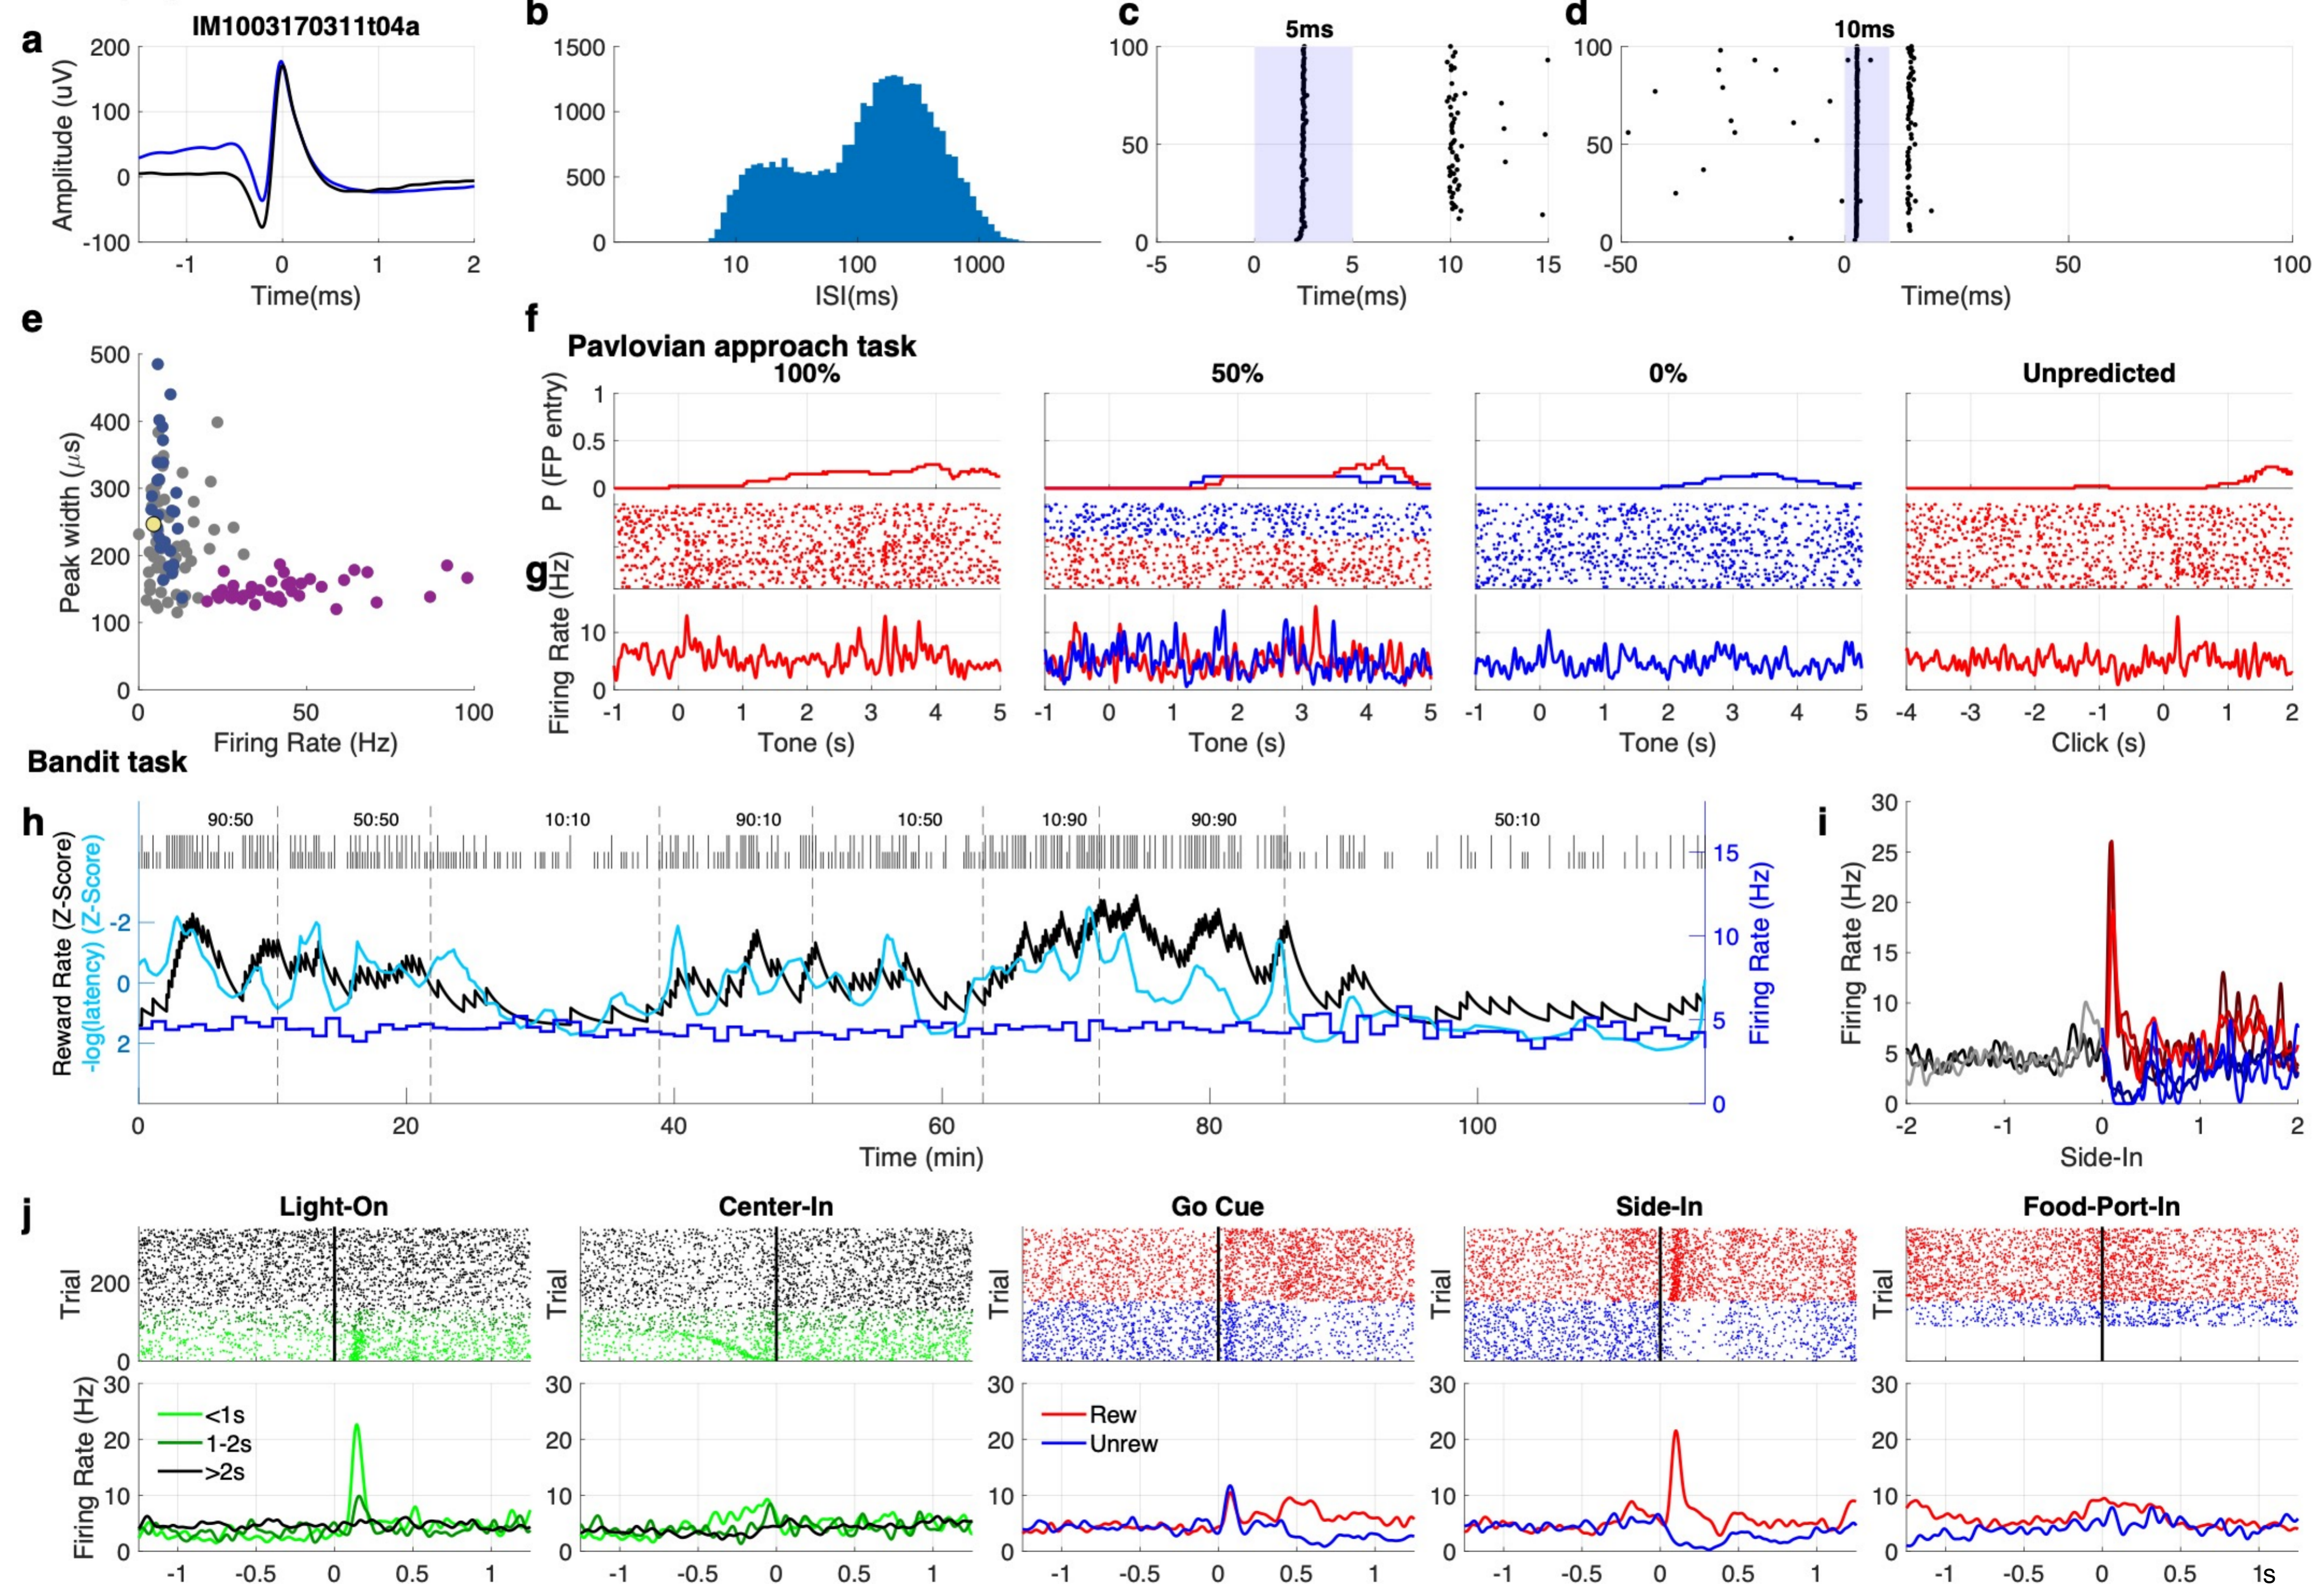

# Neuron properties and Identification

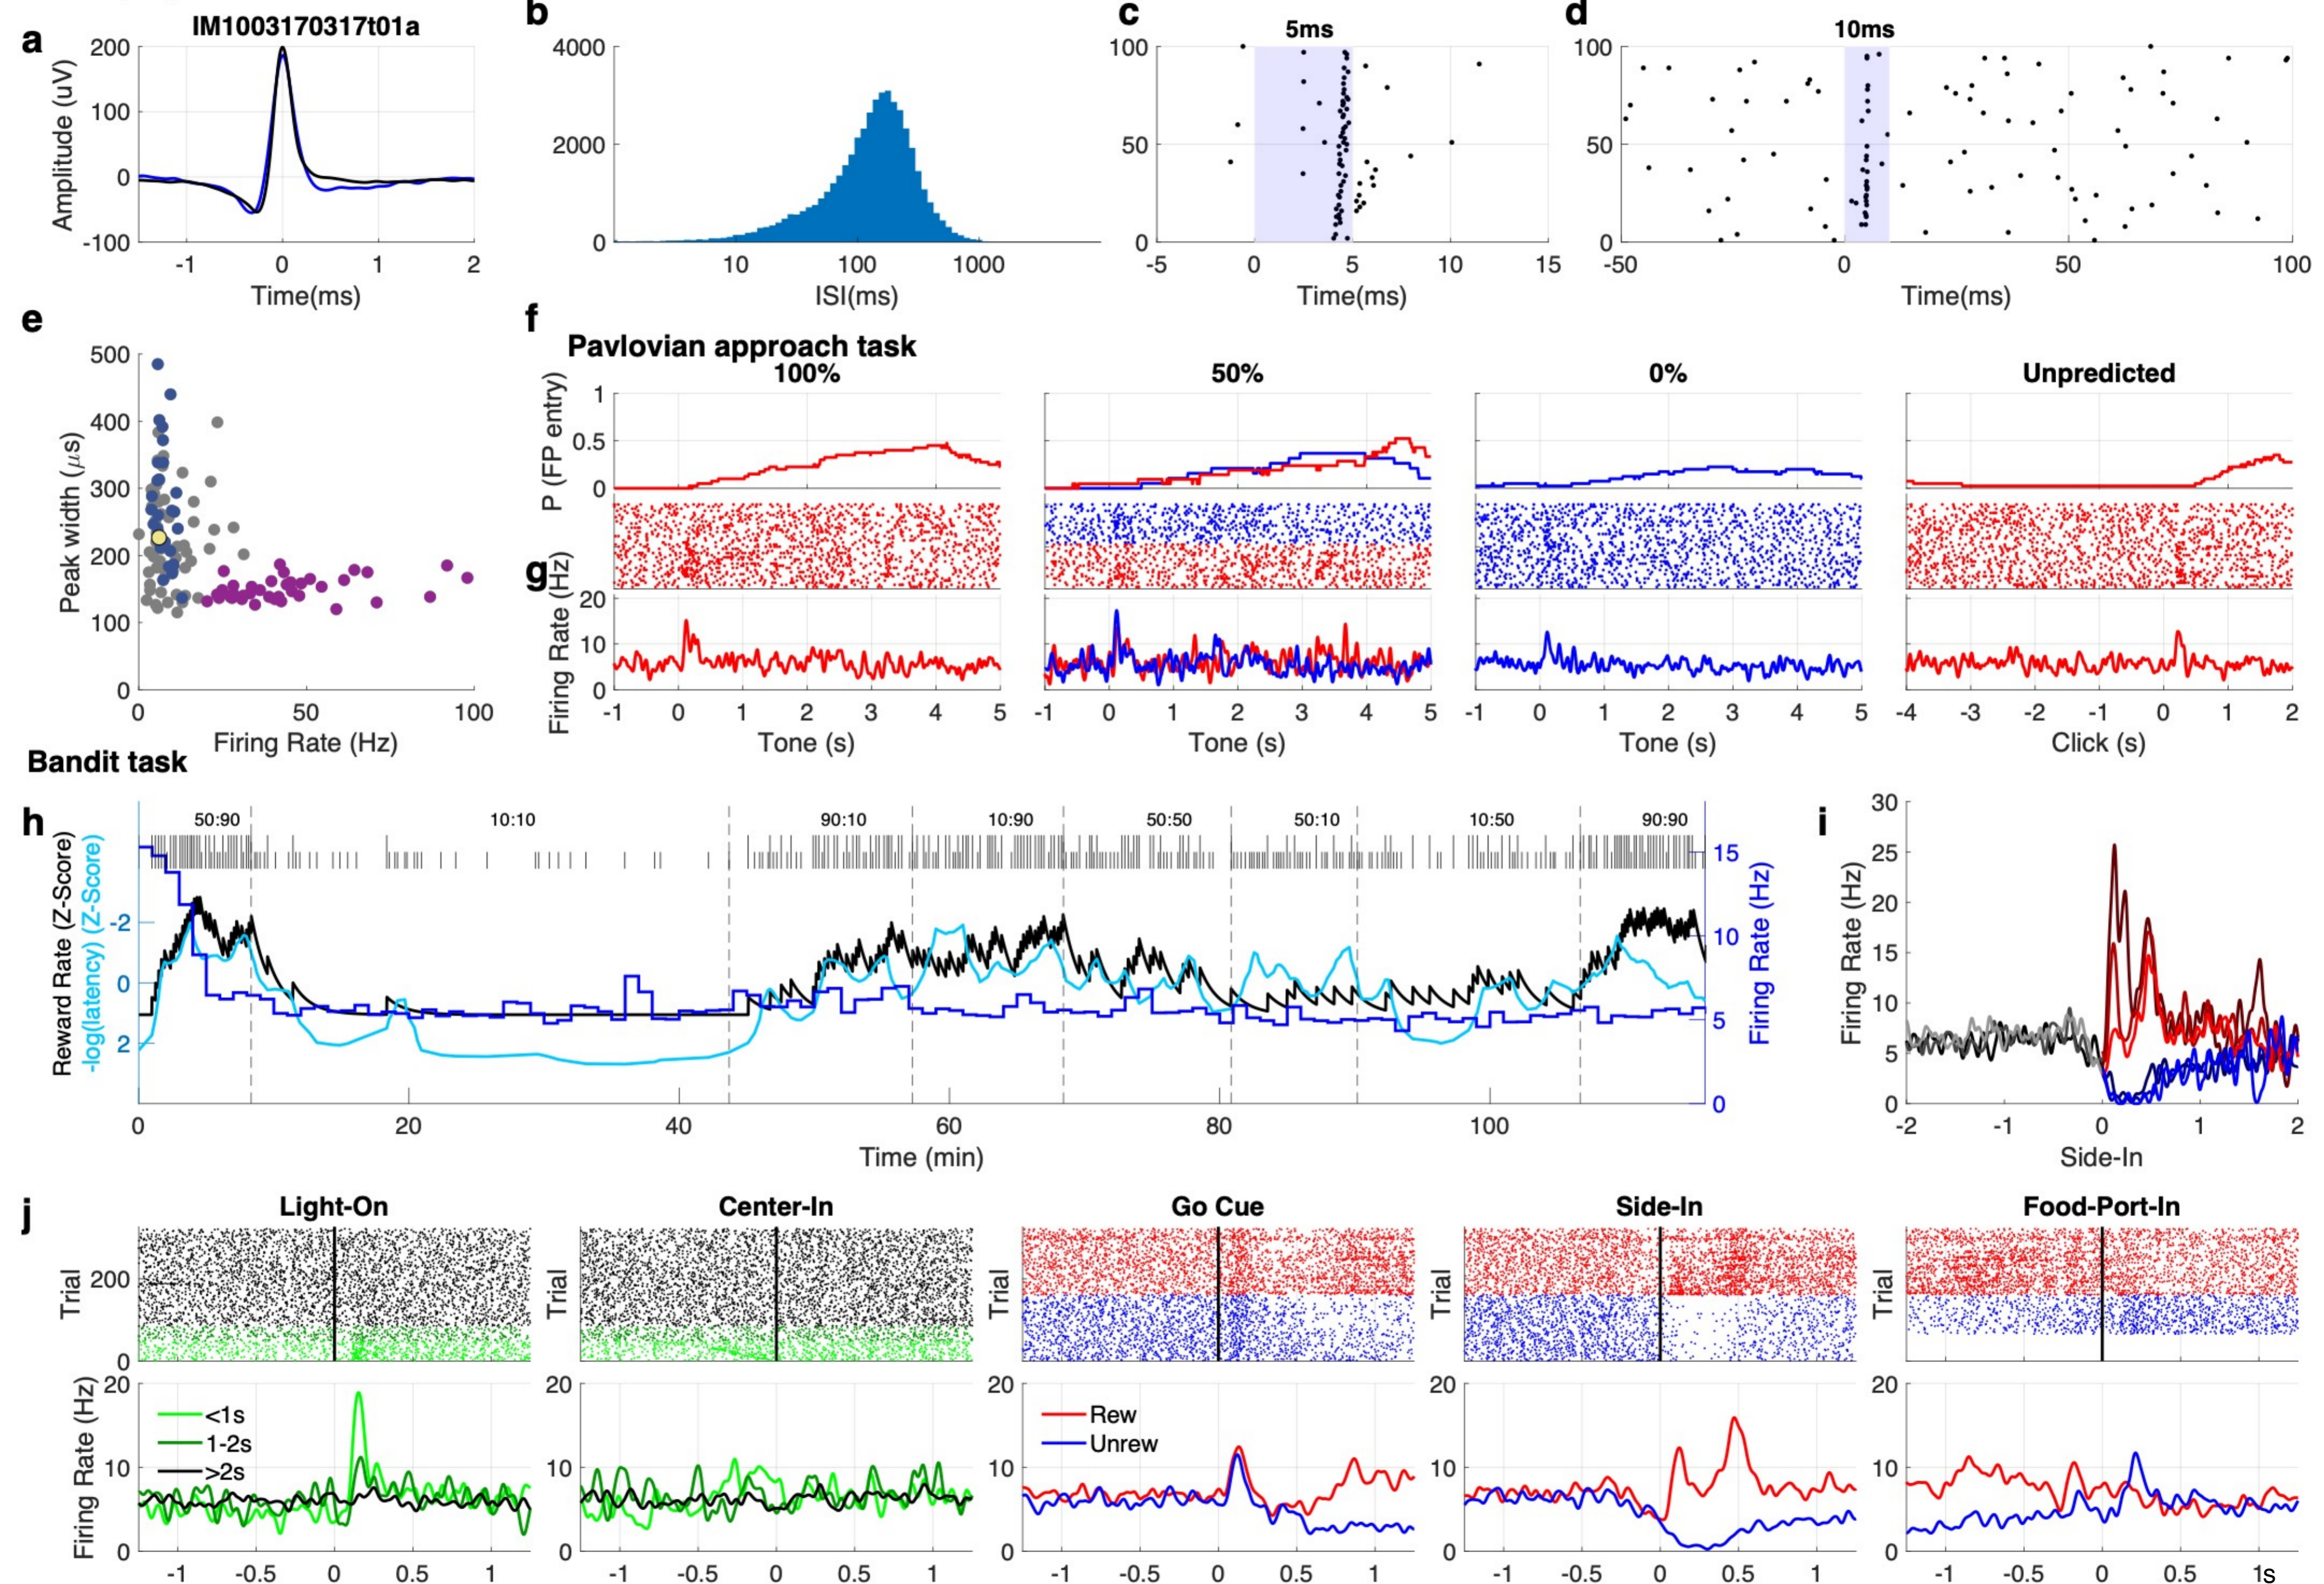

# Neuron properties and Identification

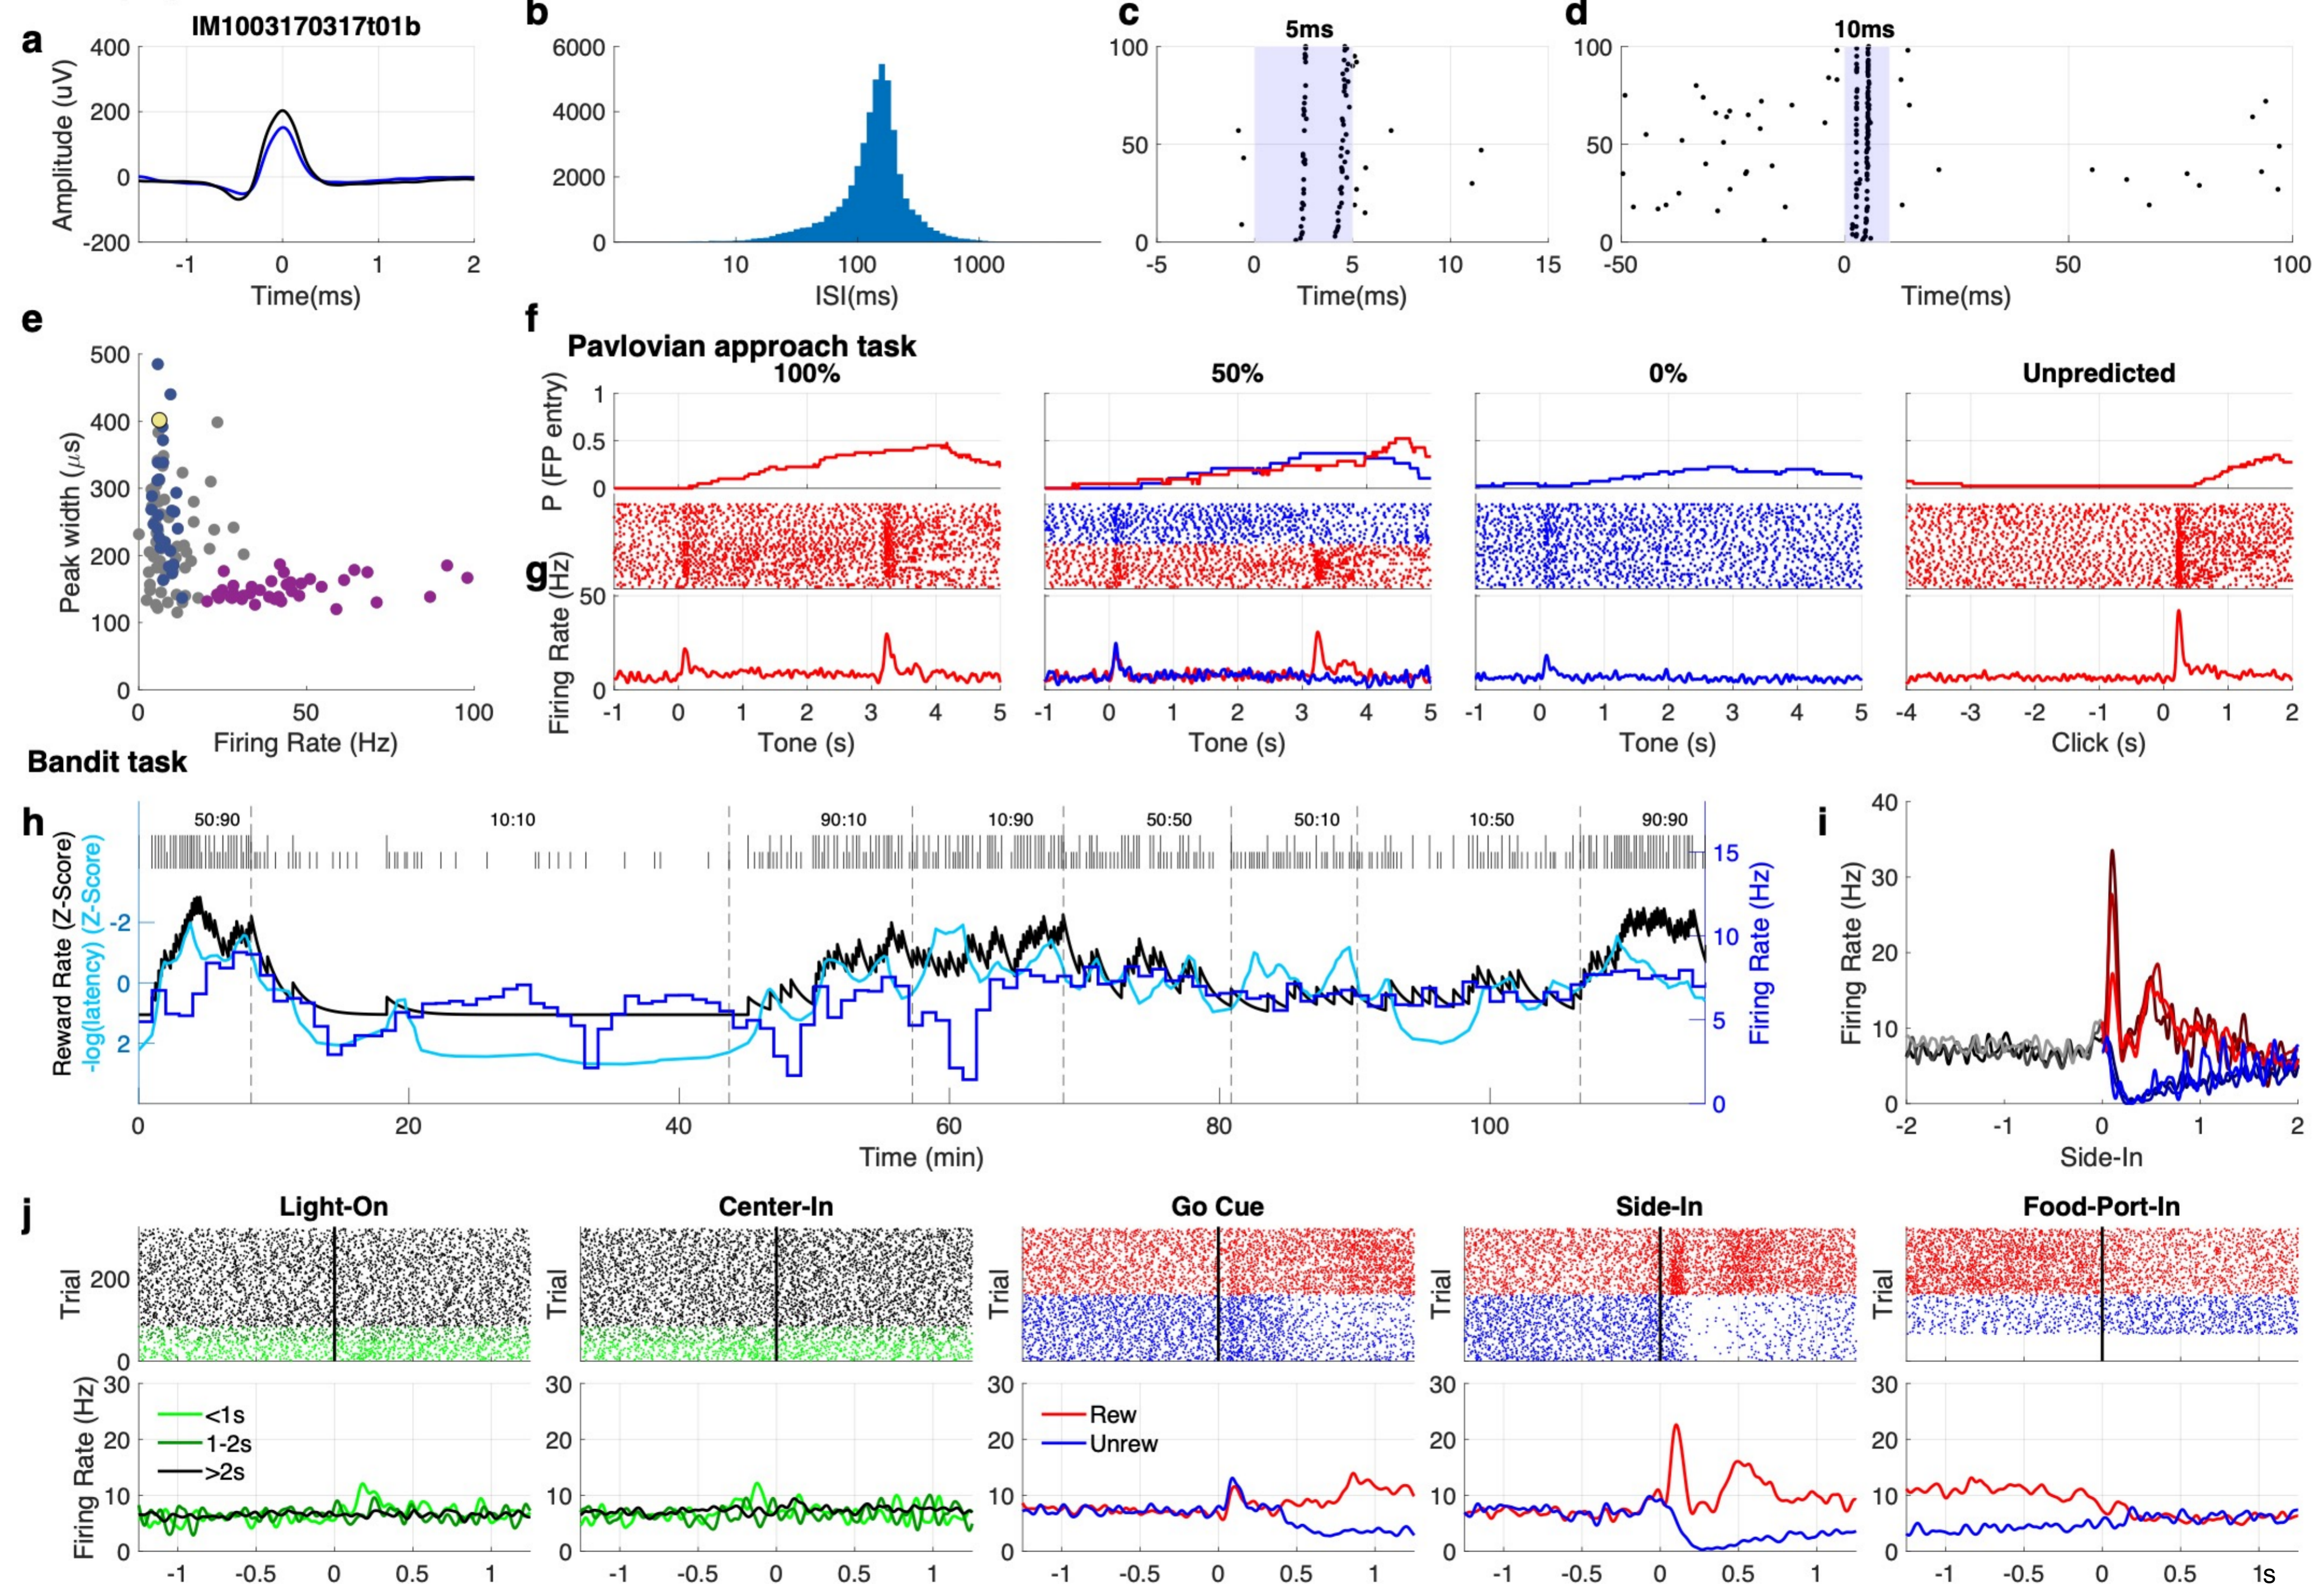

# Neuron properties and Identification

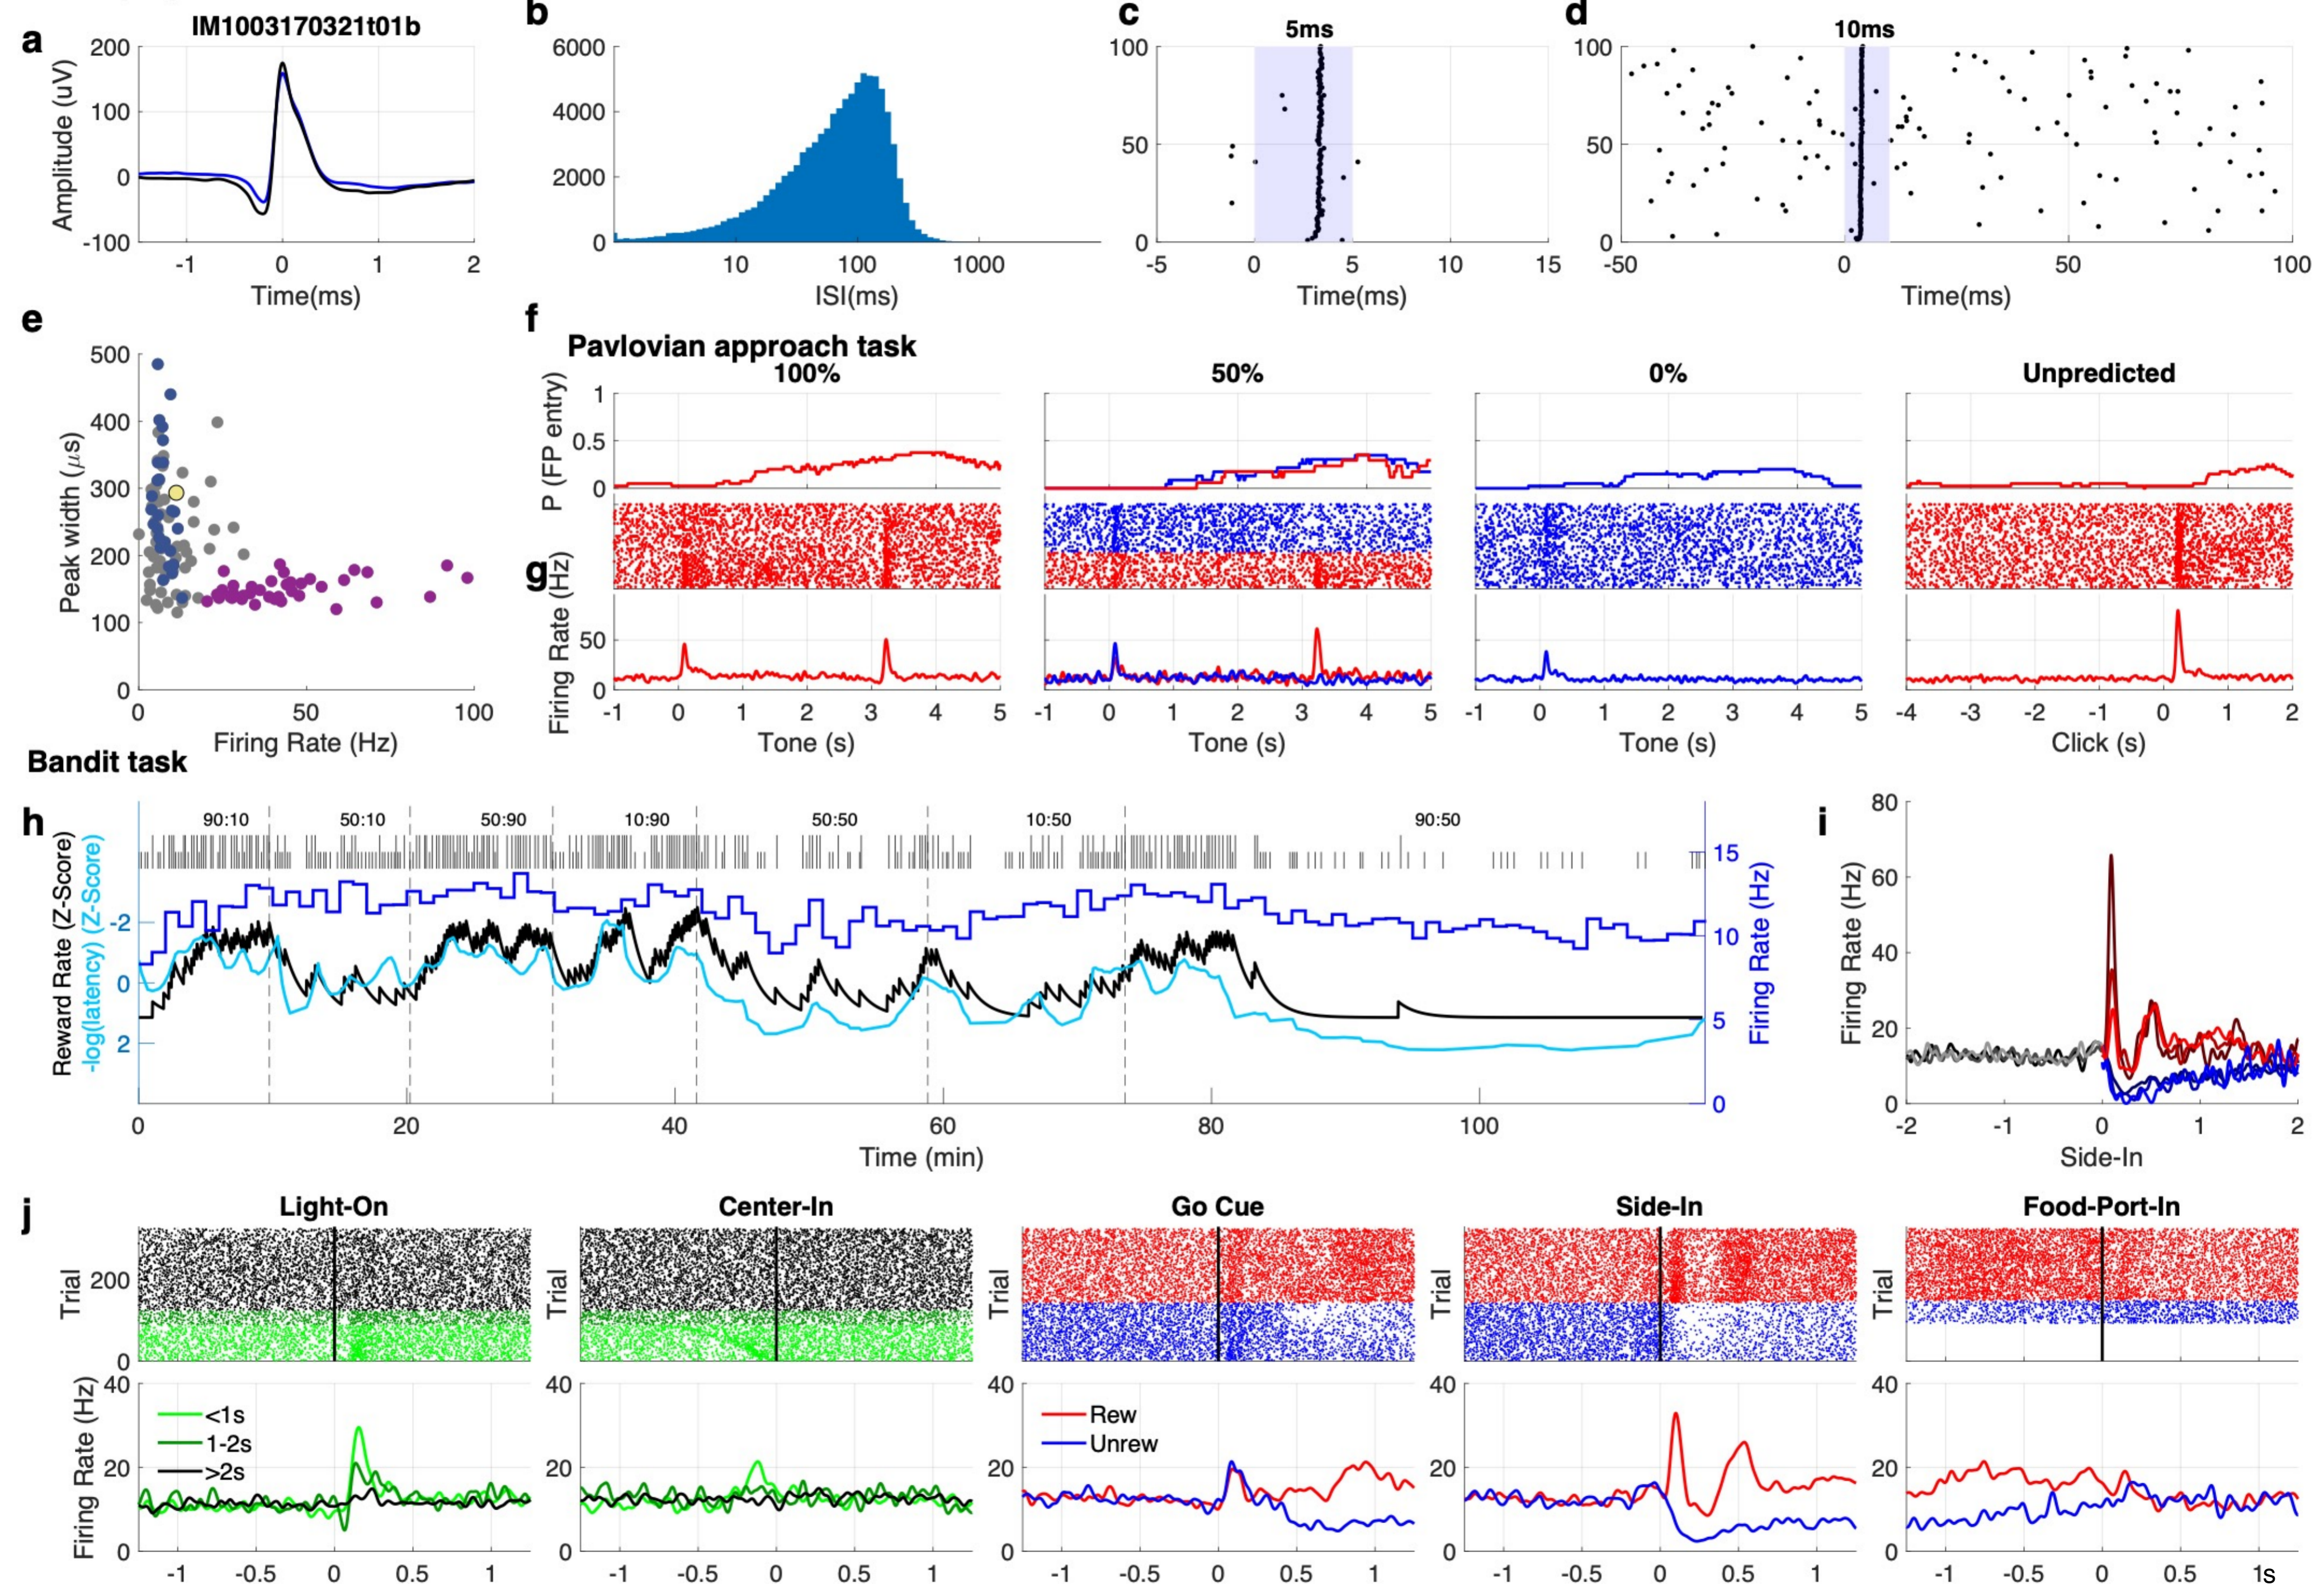

# Neuron properties and Identification

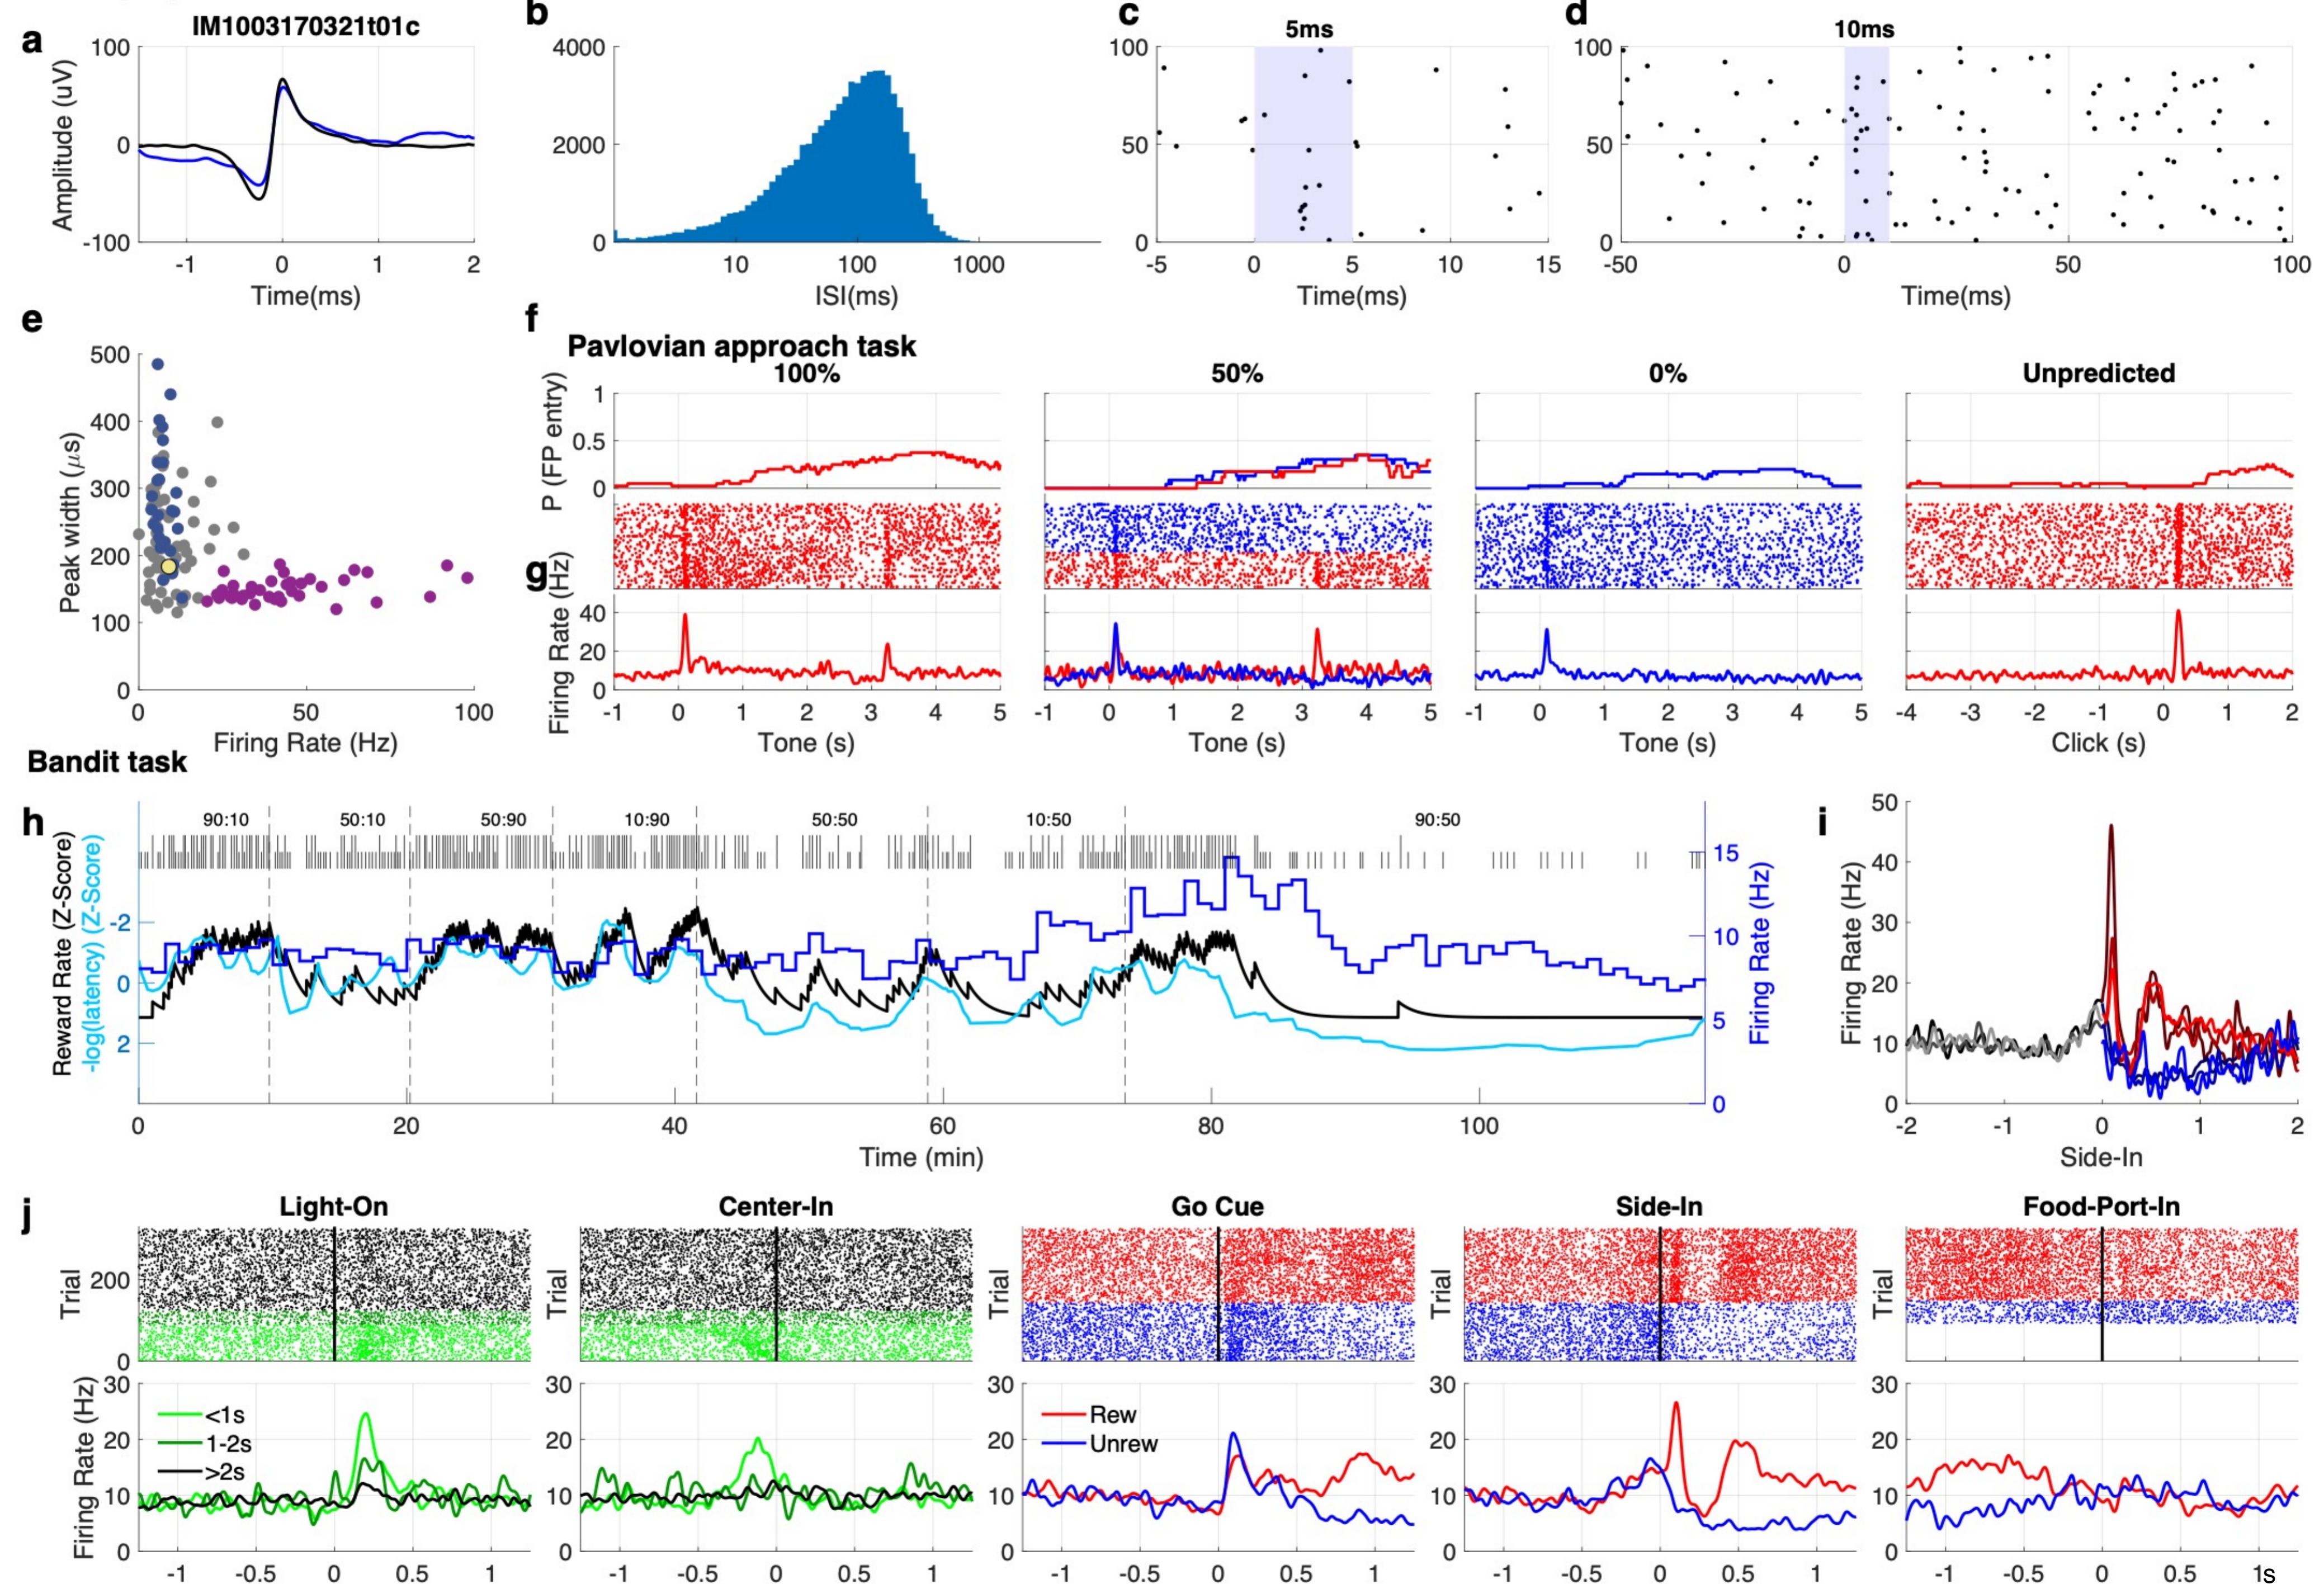

# Neuron properties and Identification

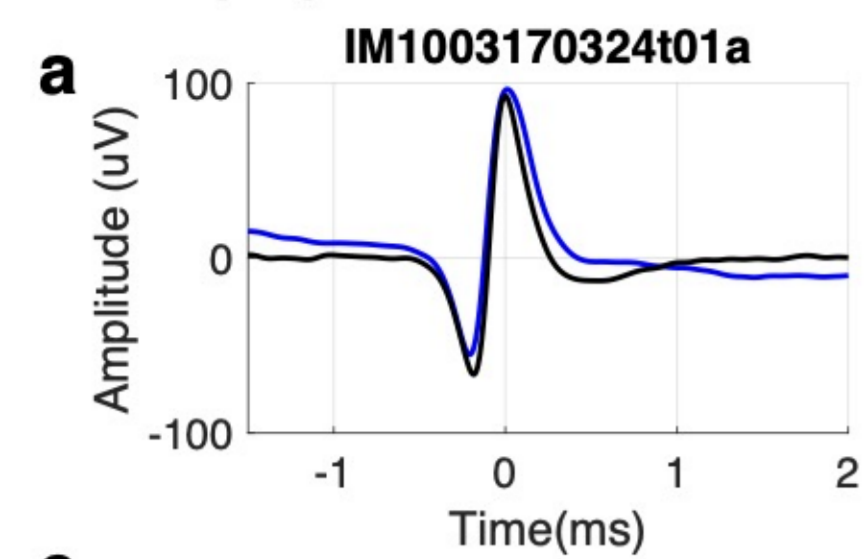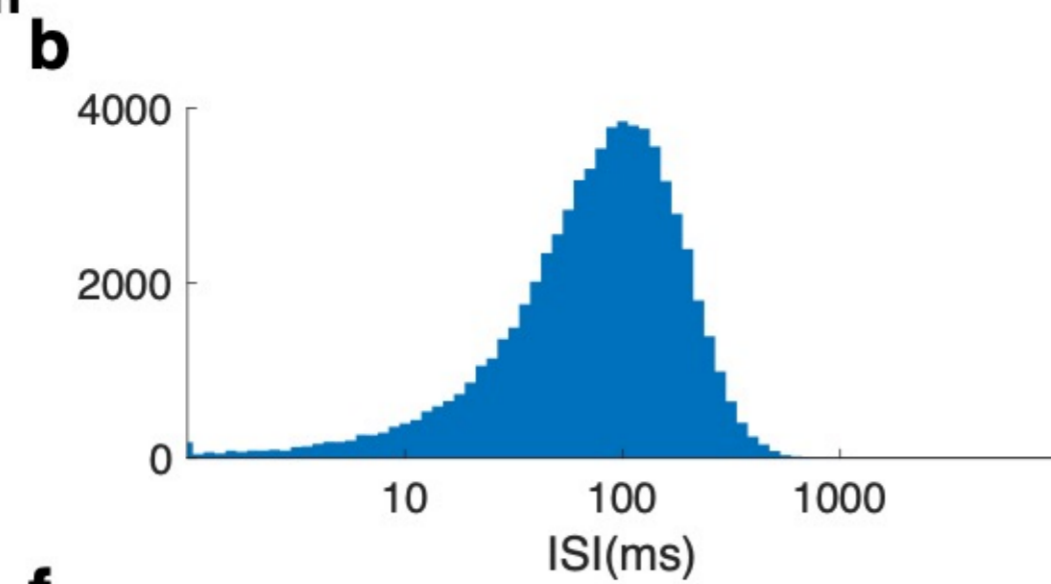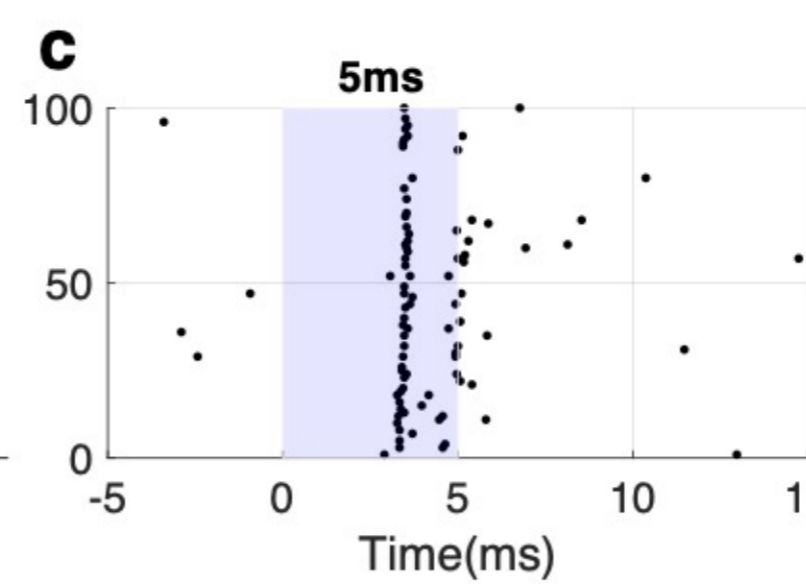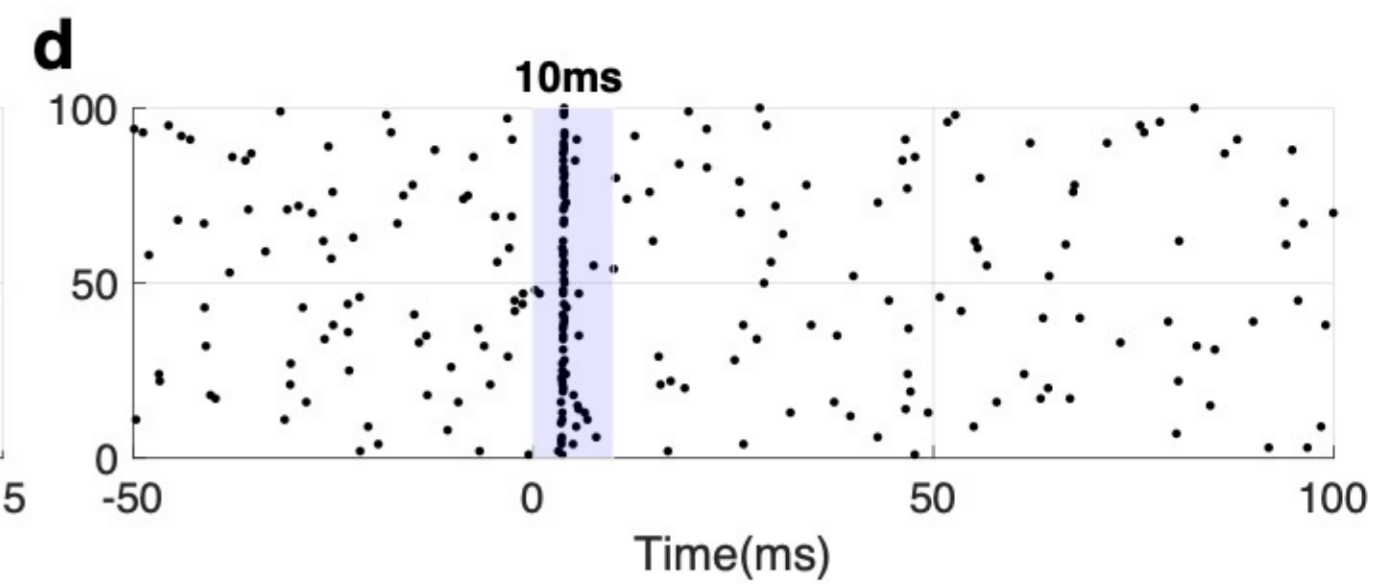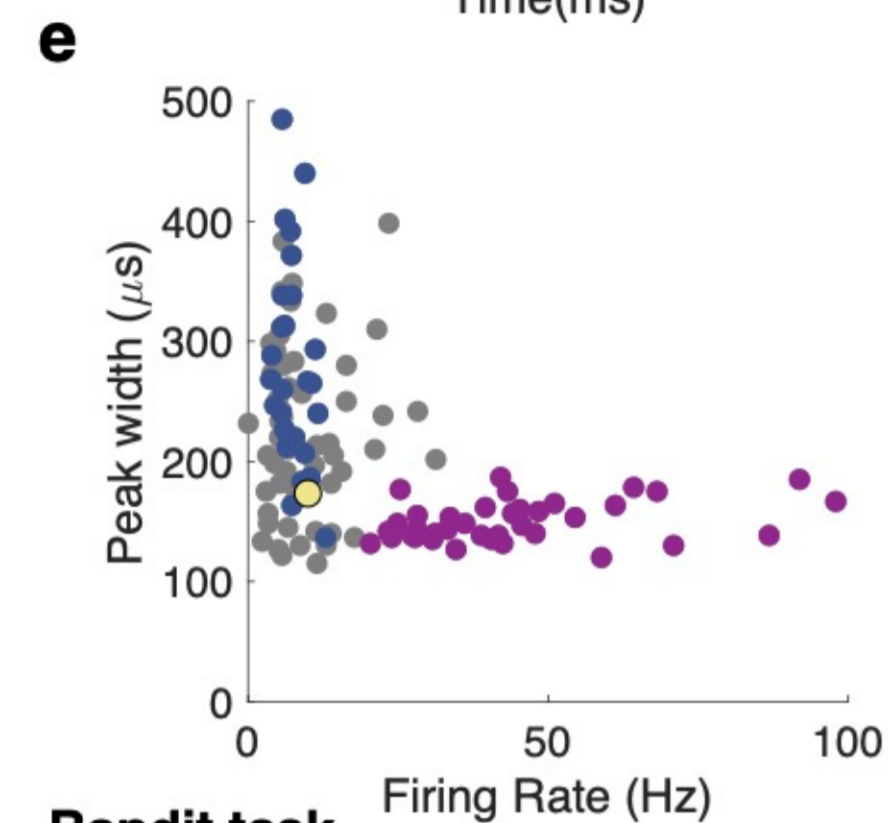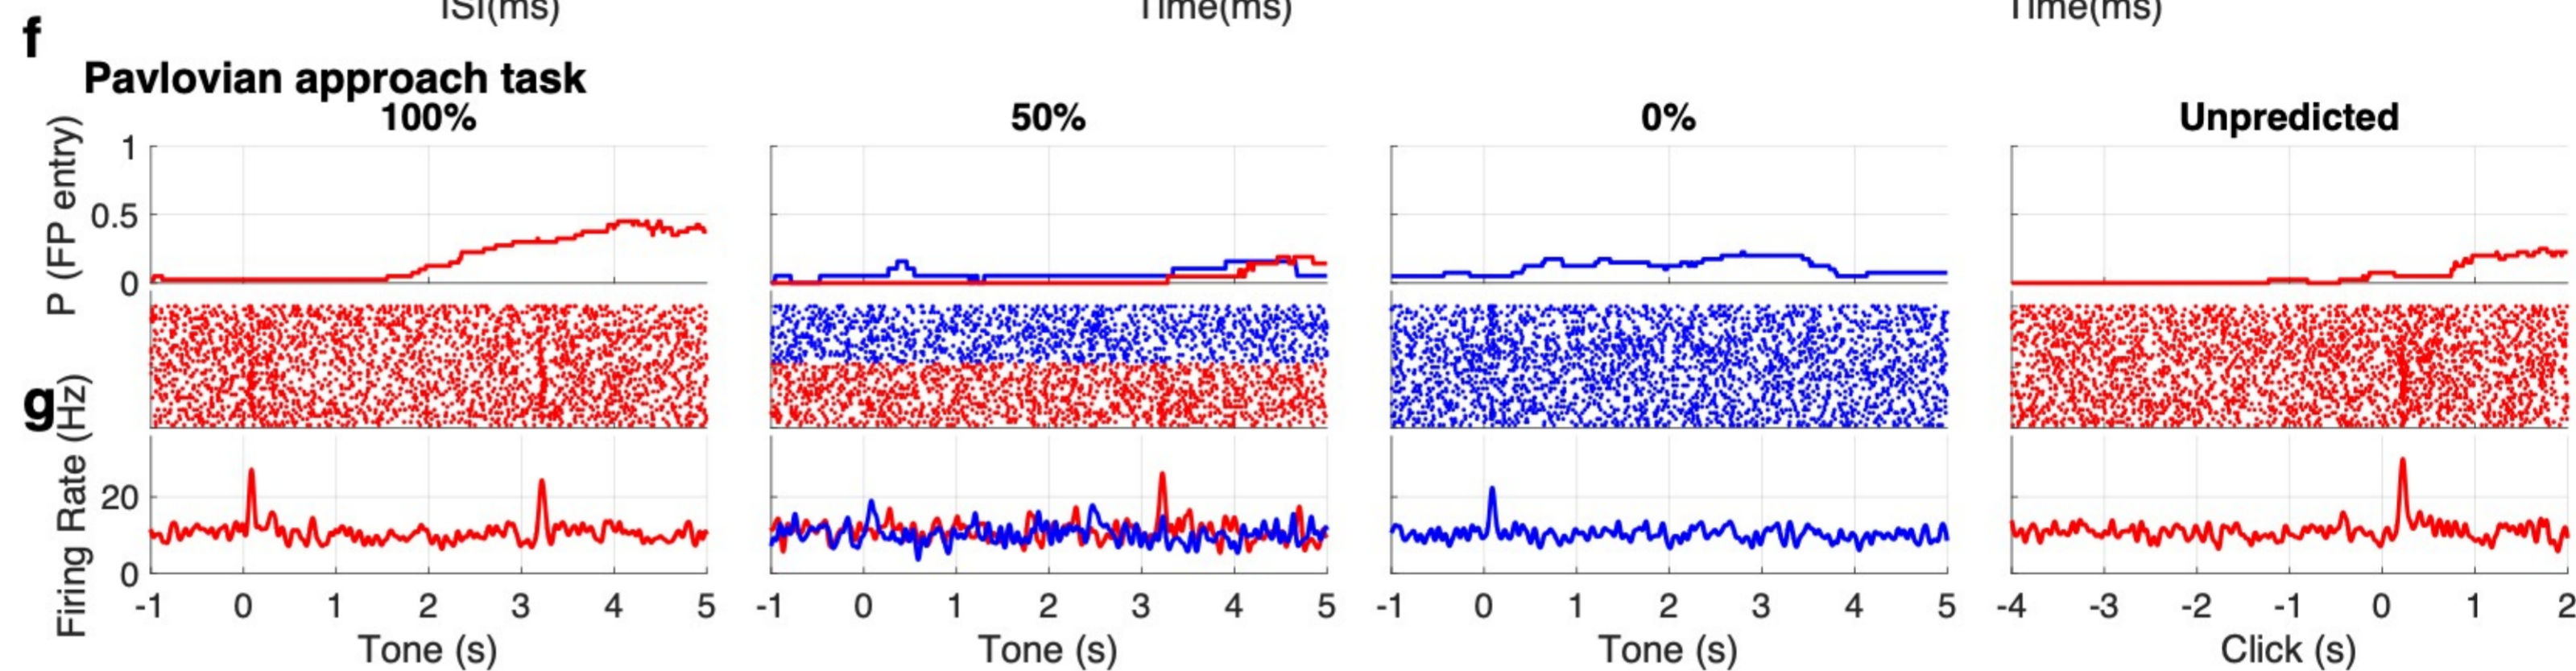

## Bandit task

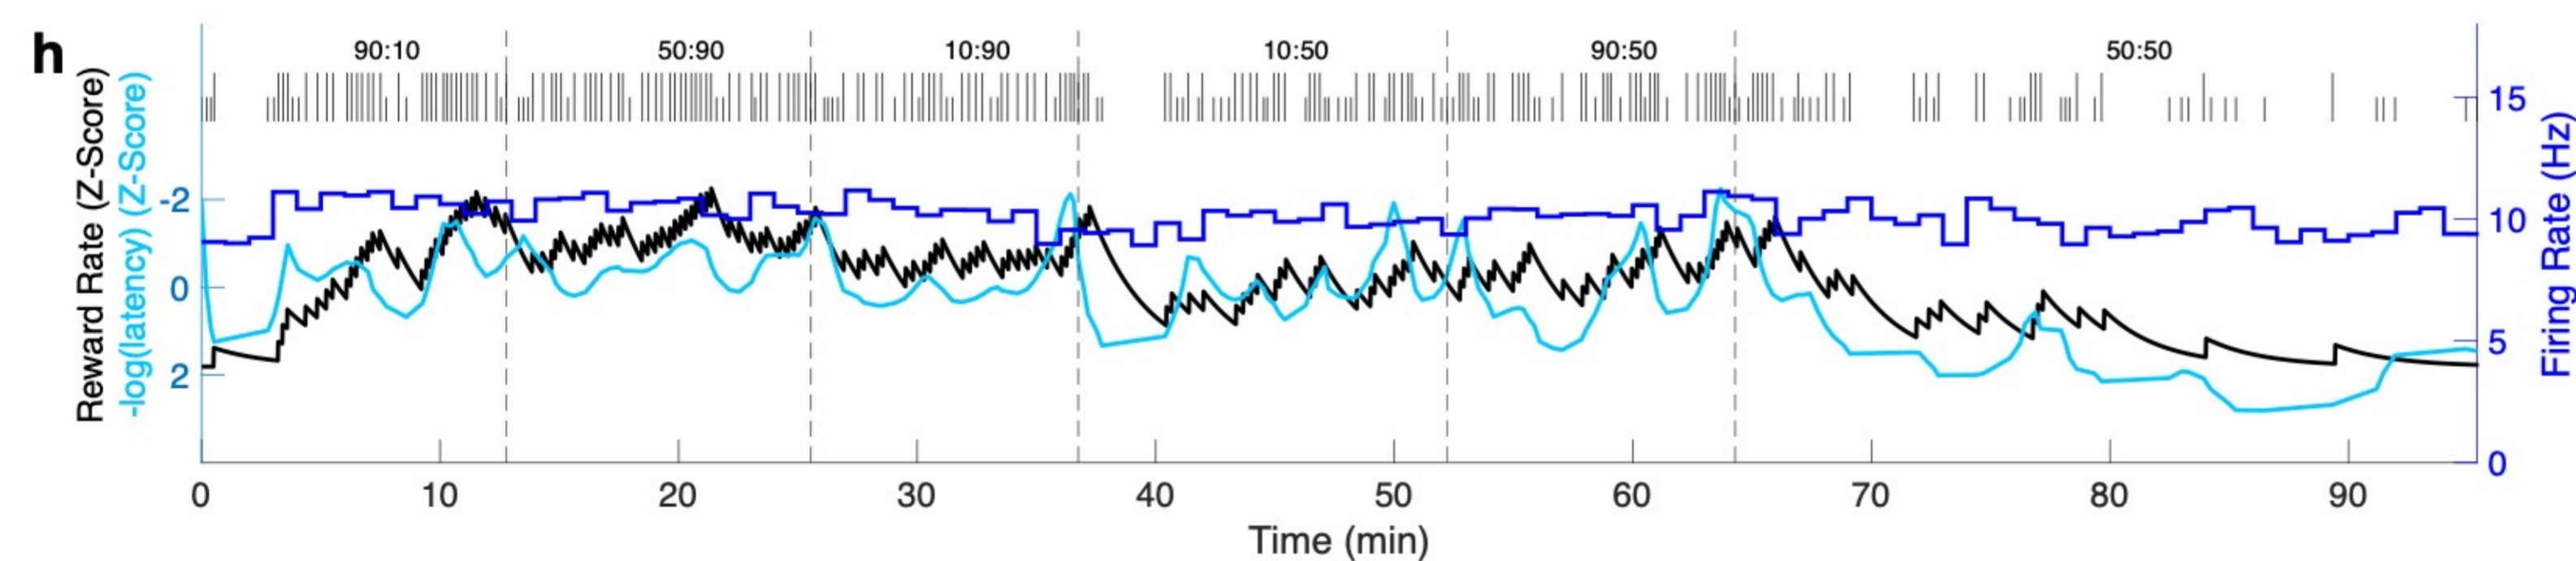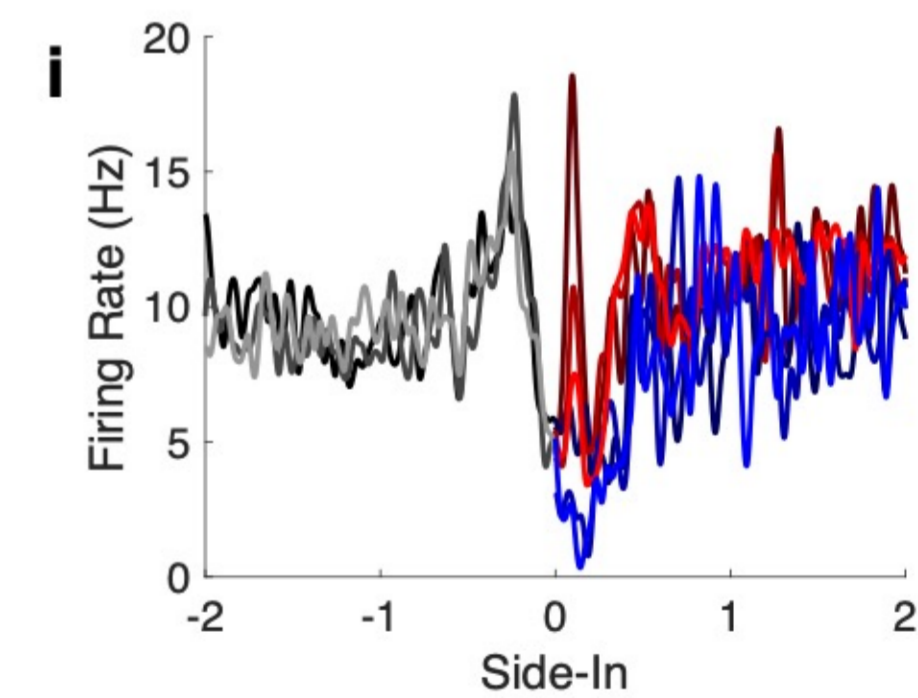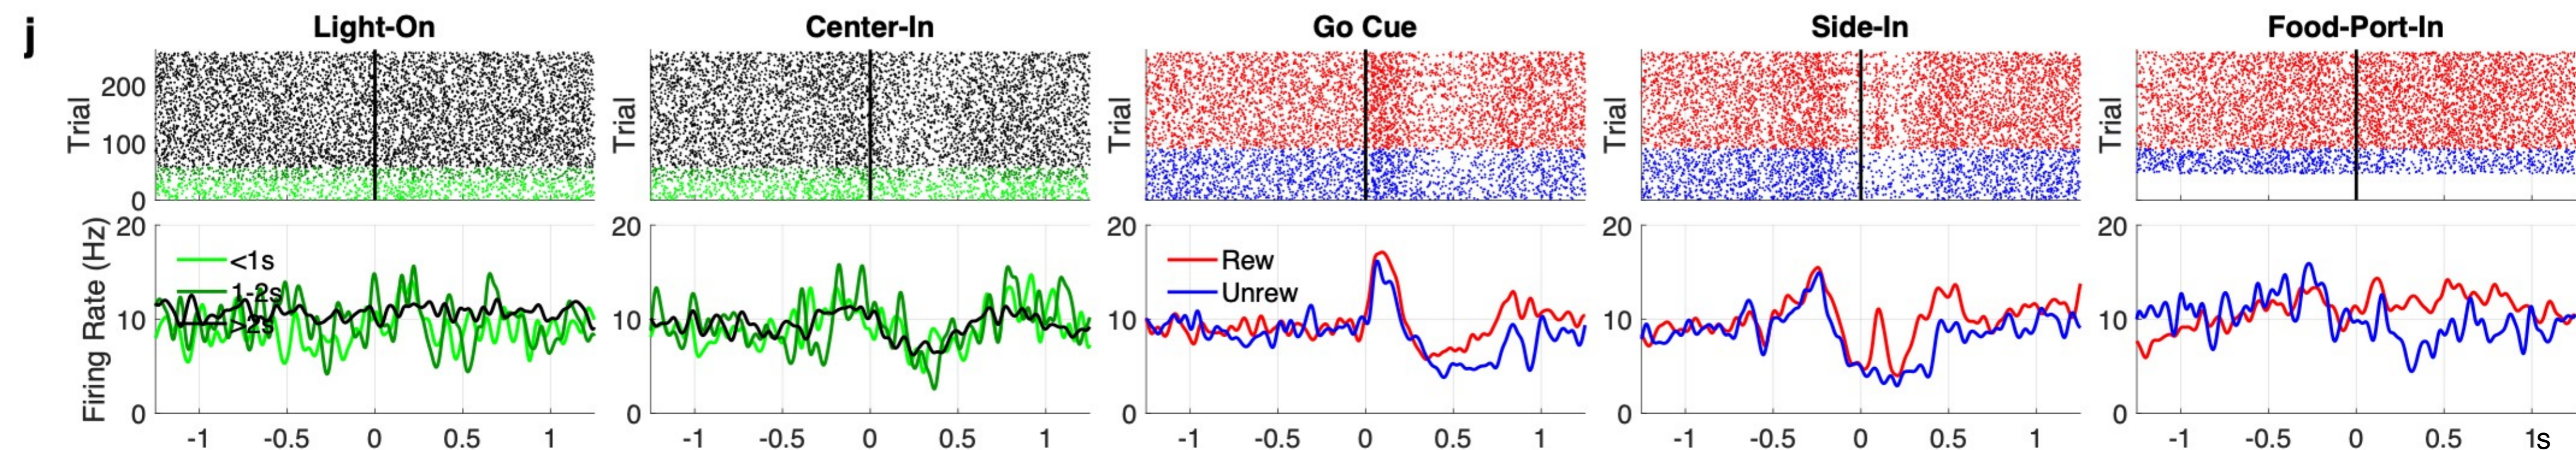

# Neuron properties and Identification

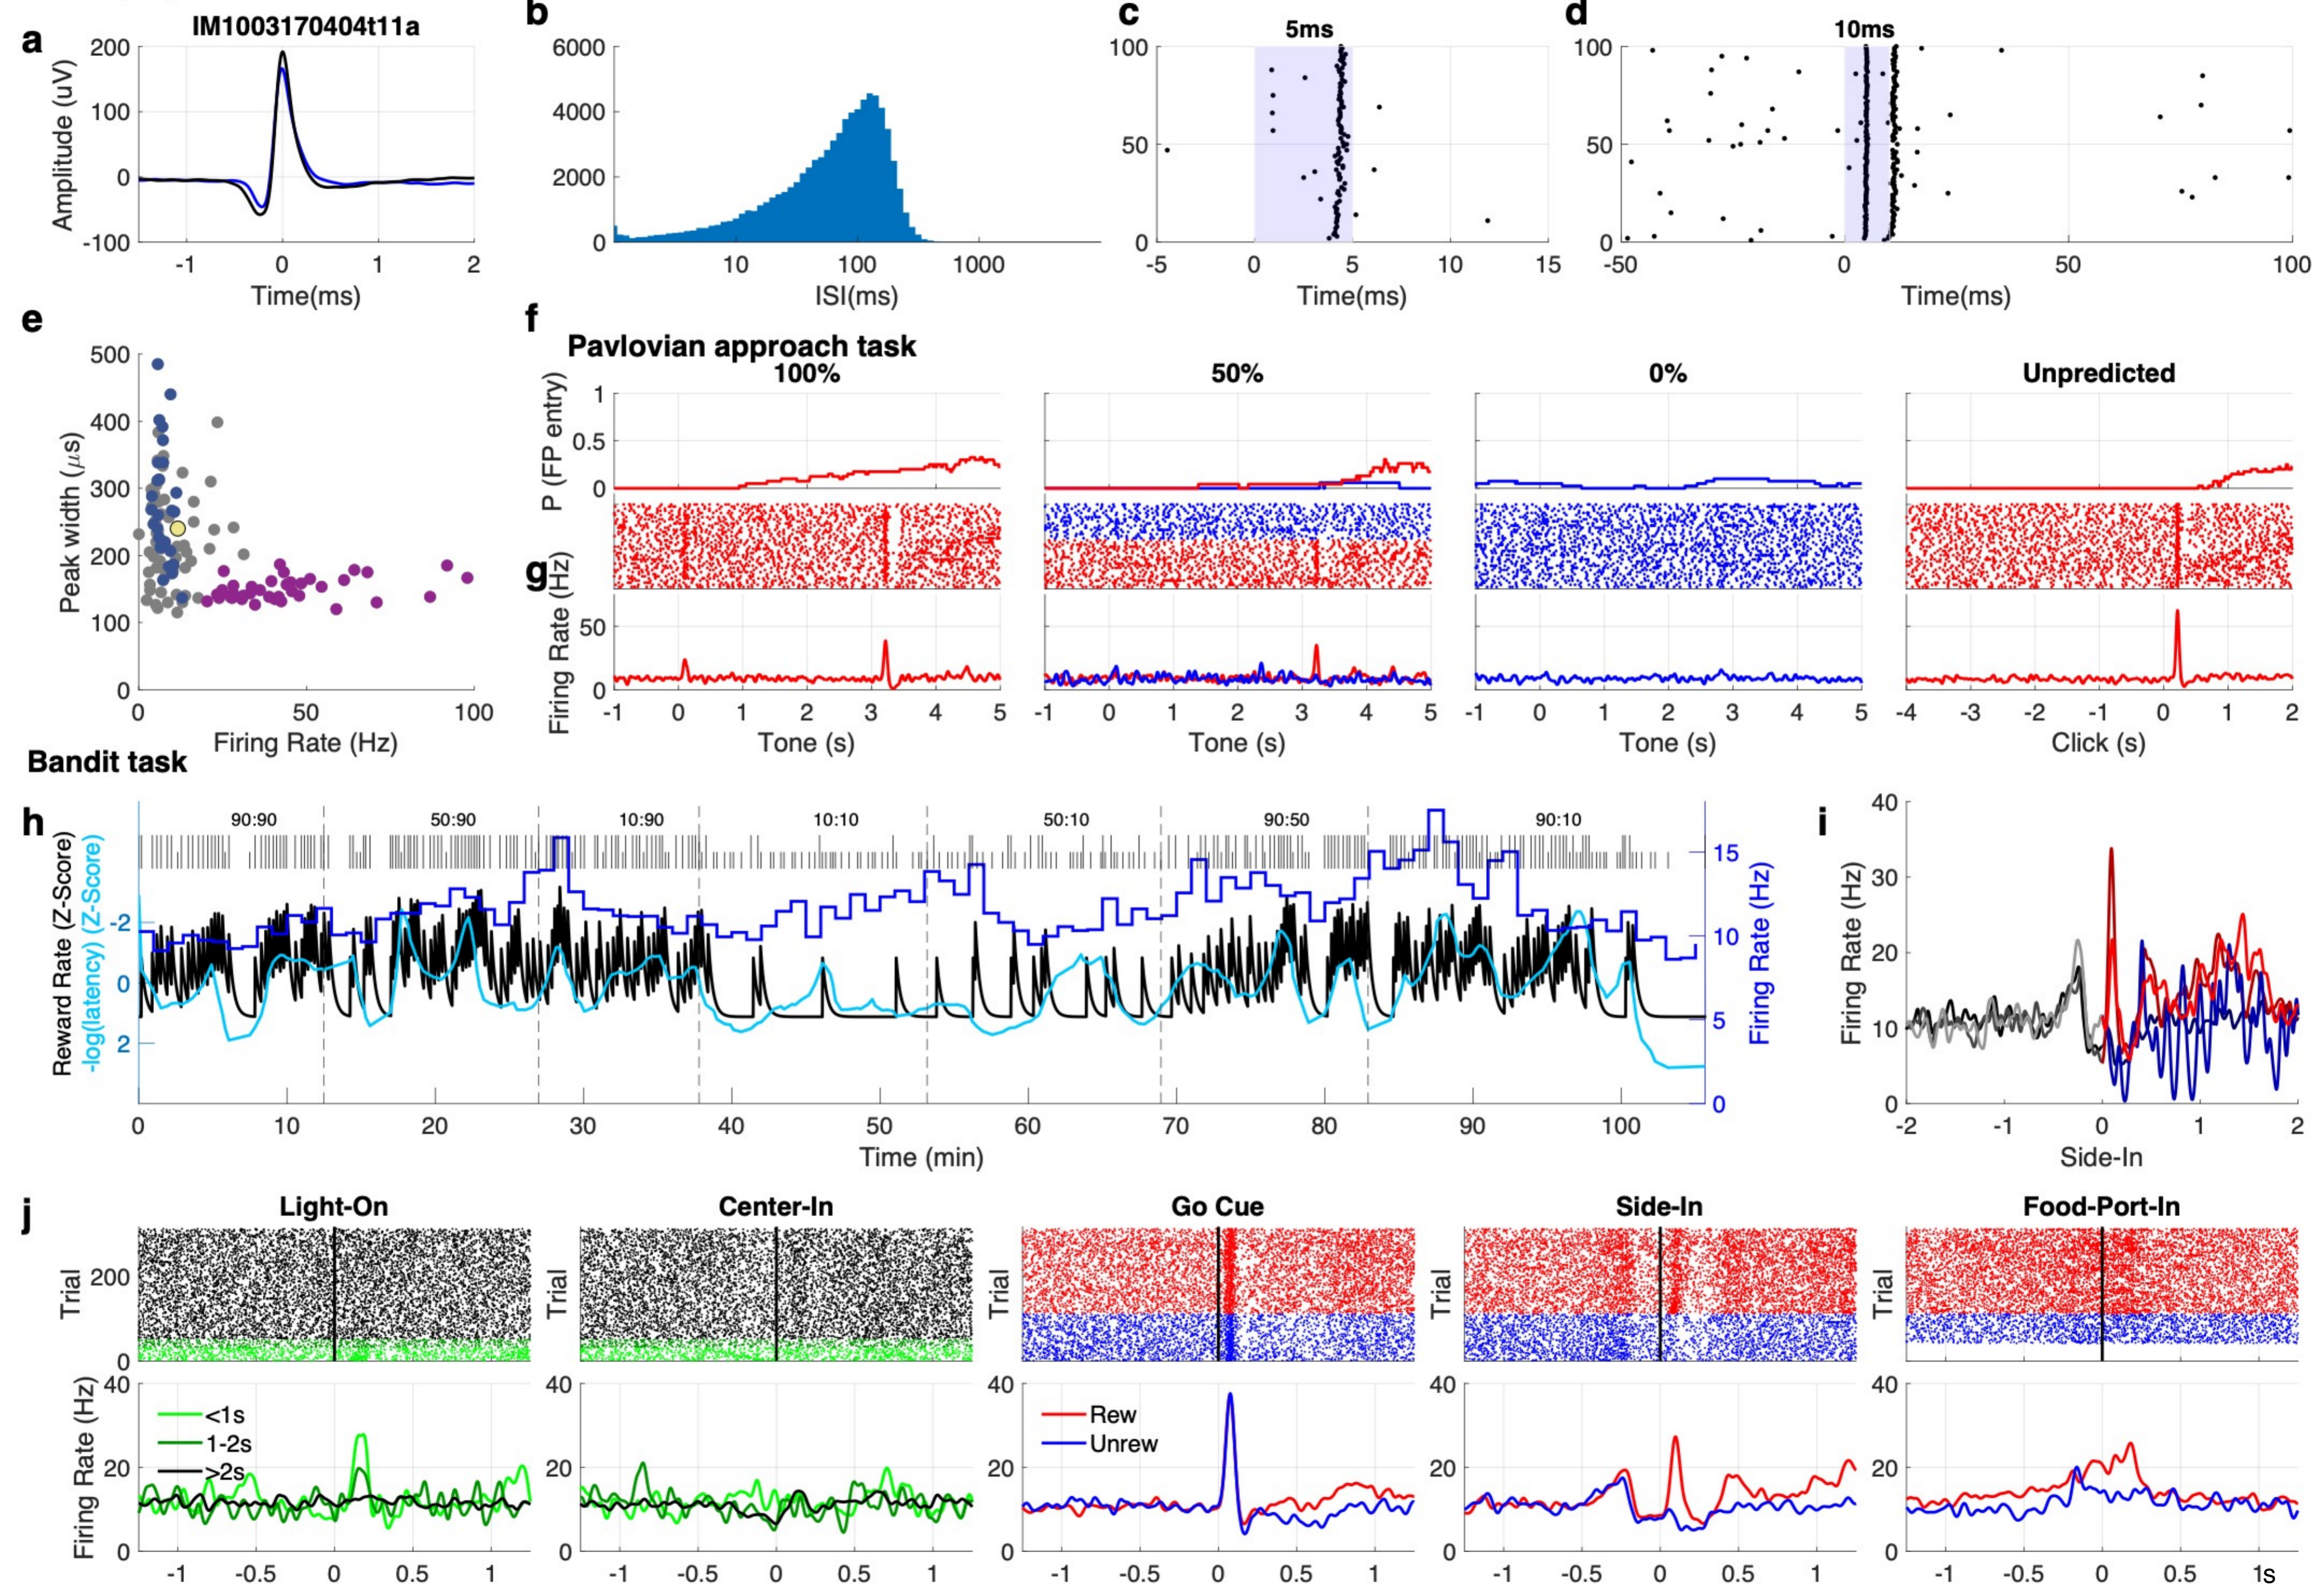



# Neuron properties and Identification

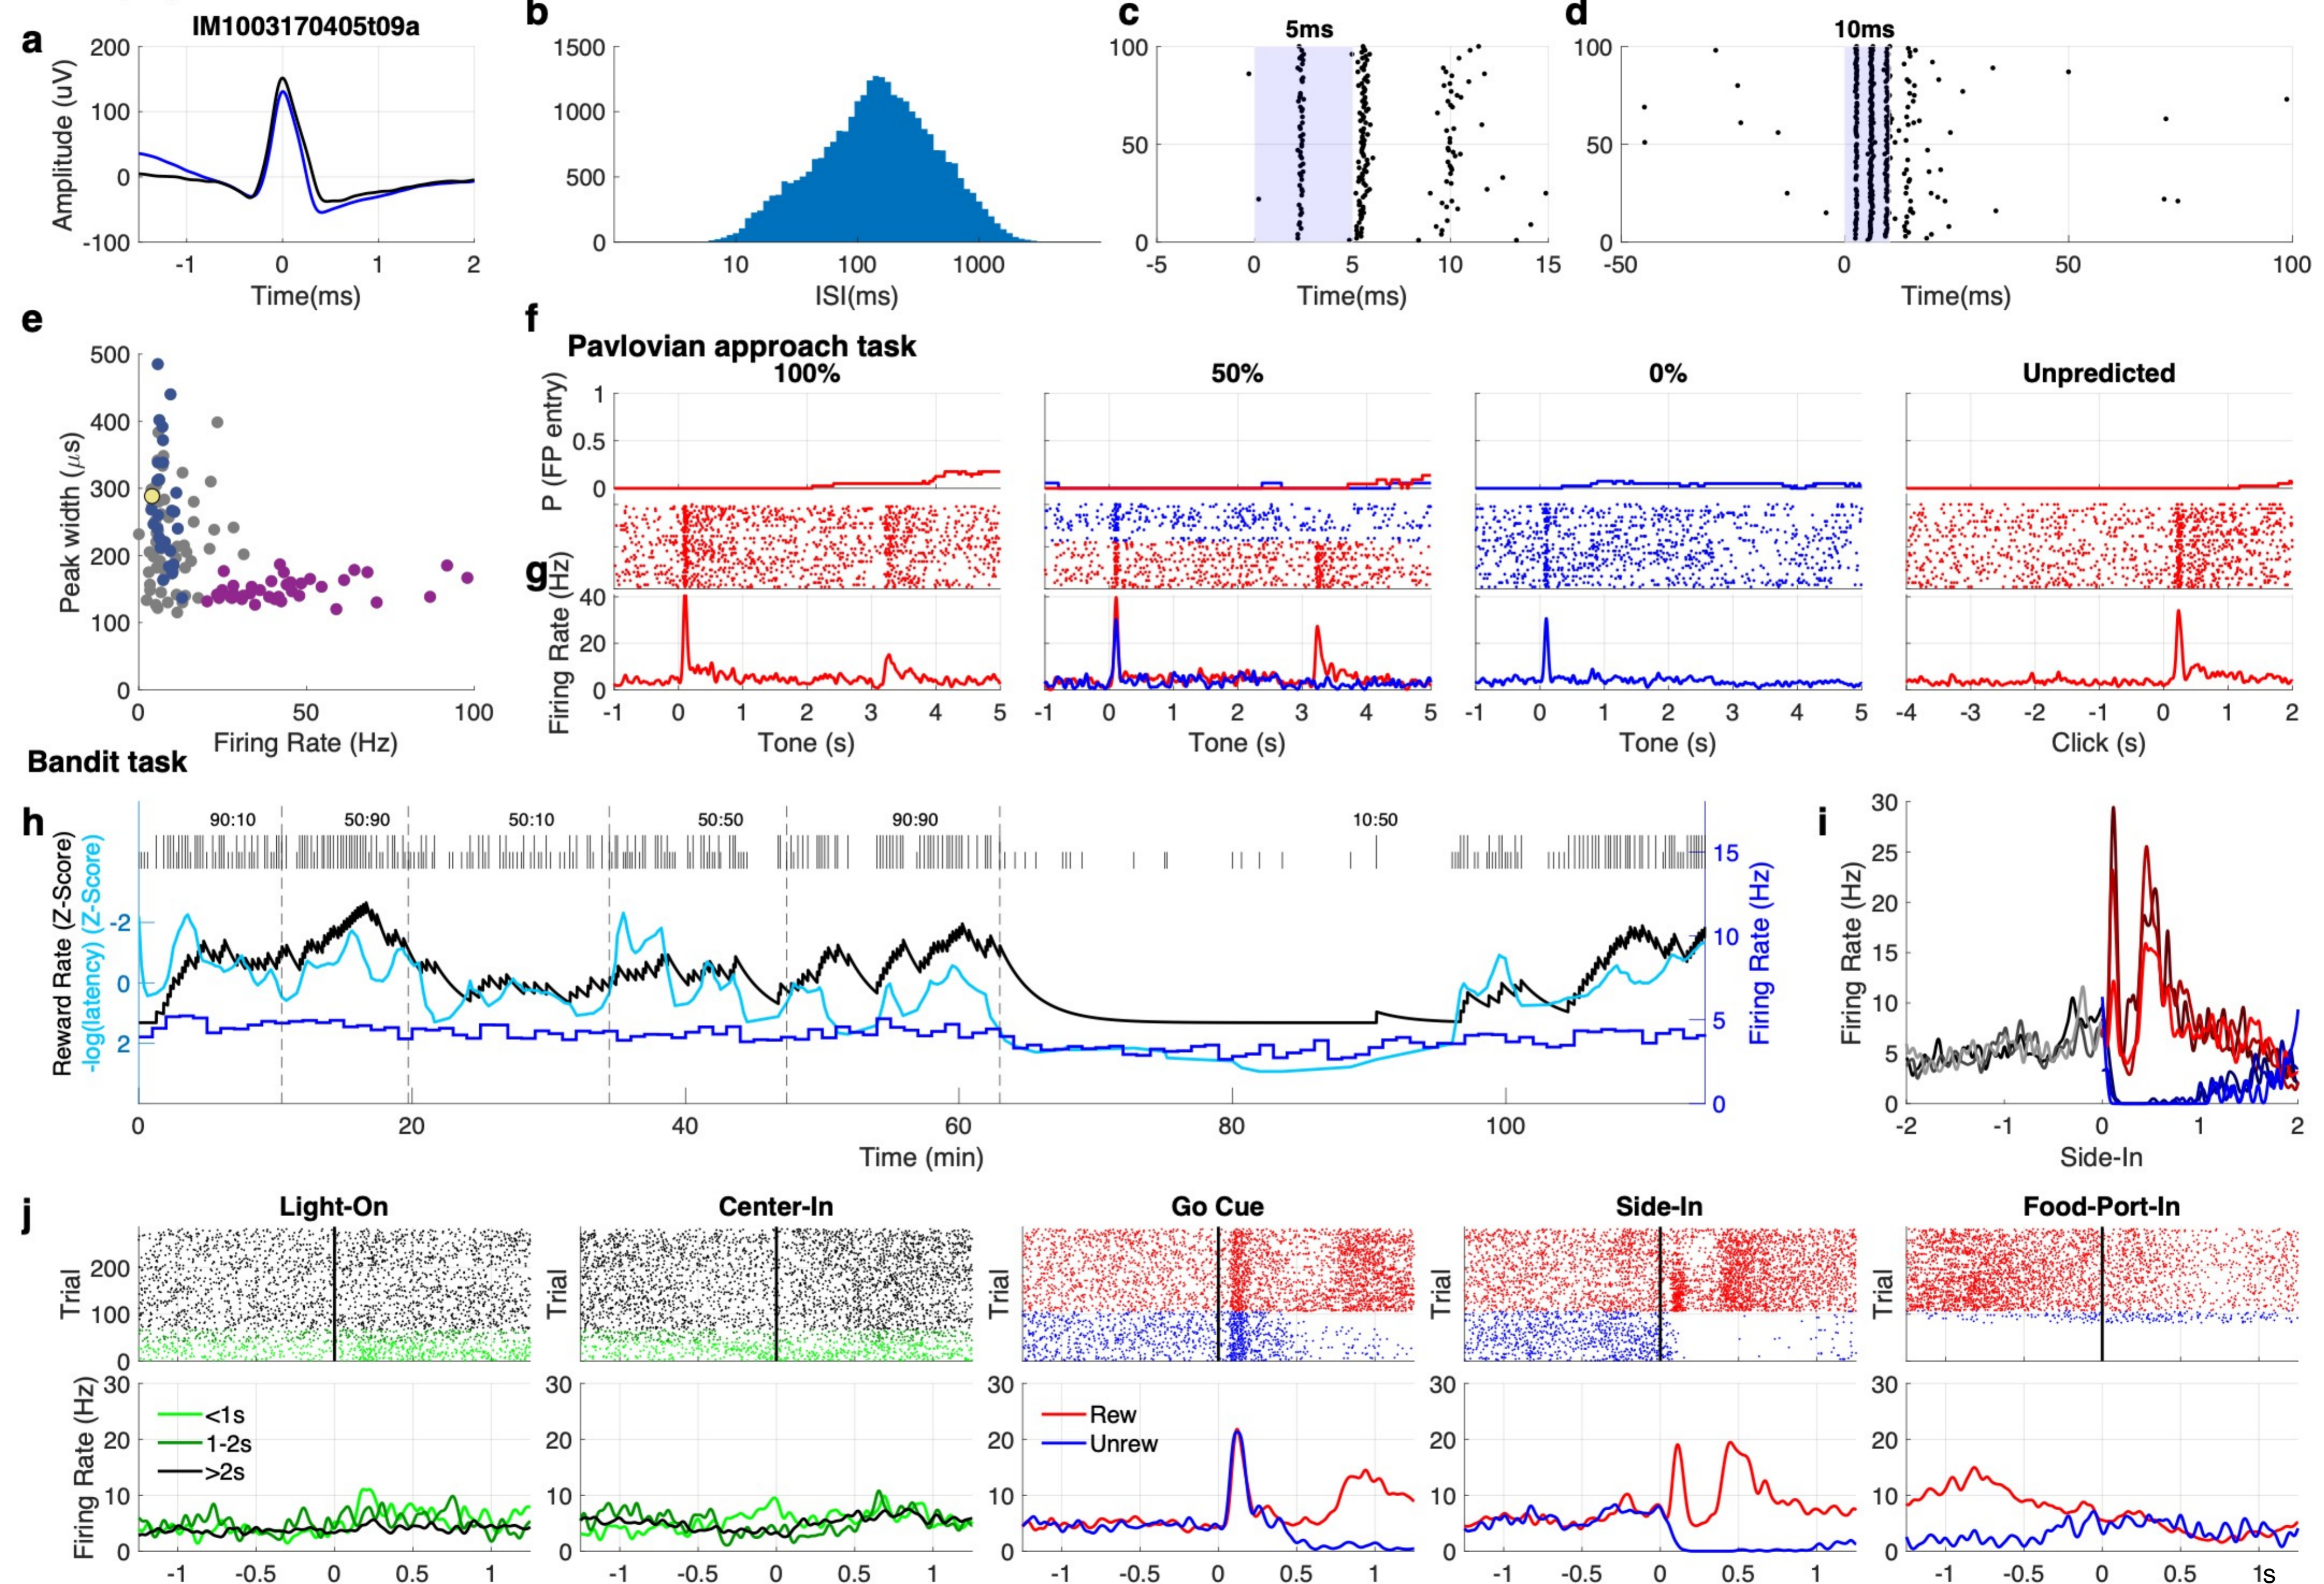

# Neuron properties and Identification

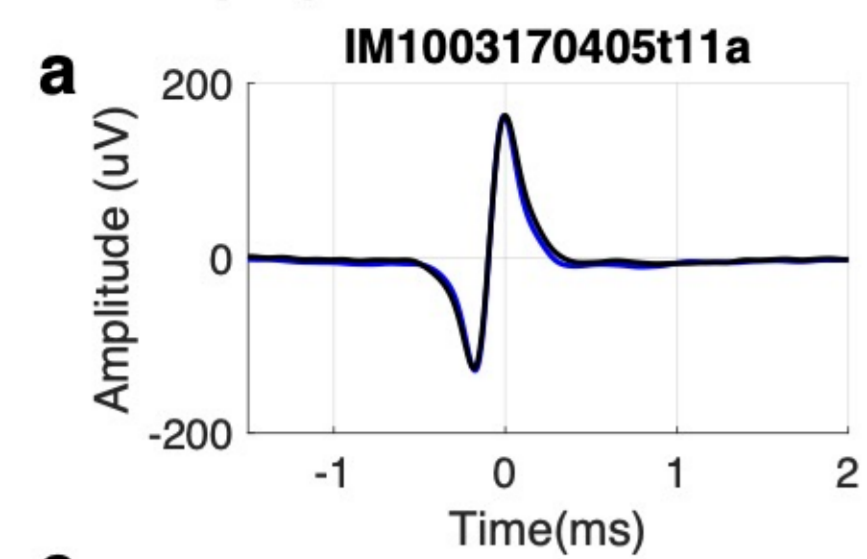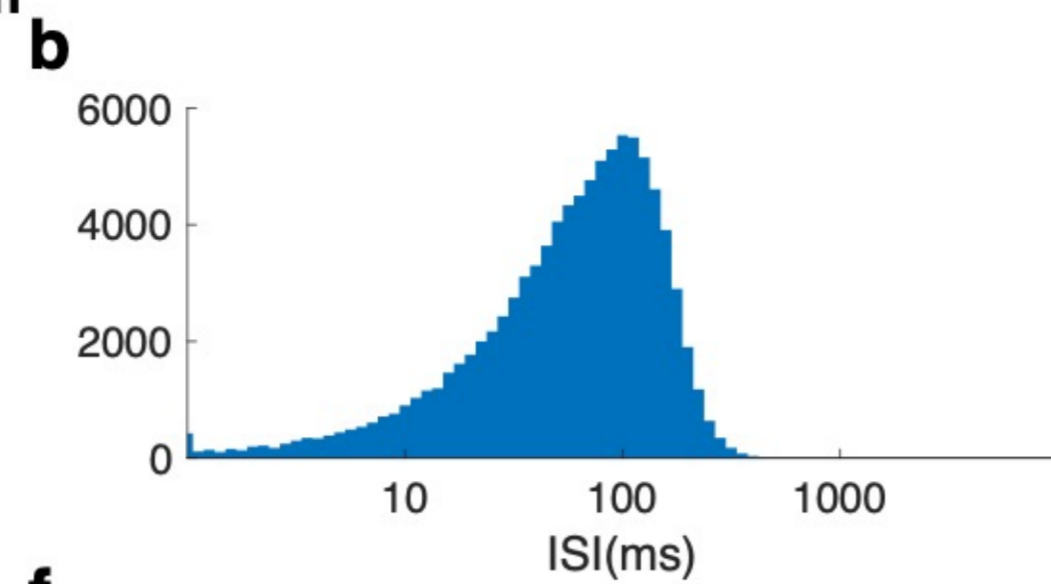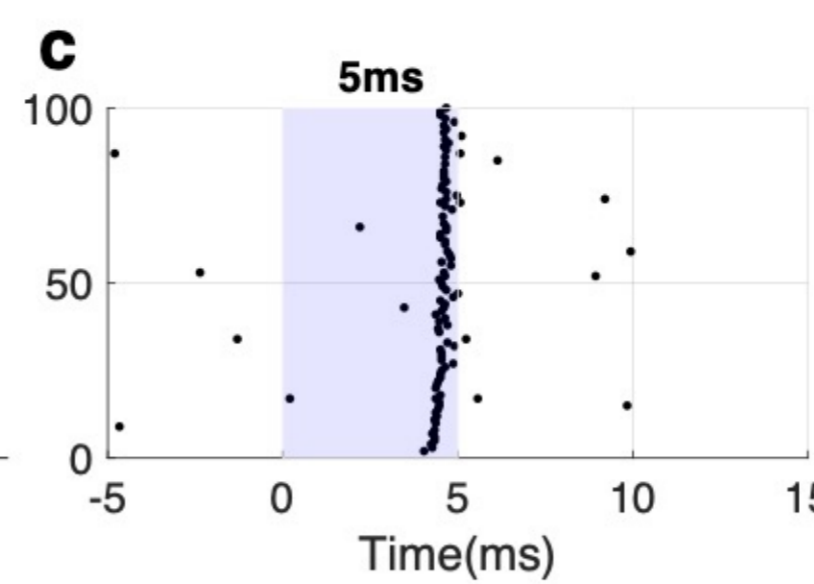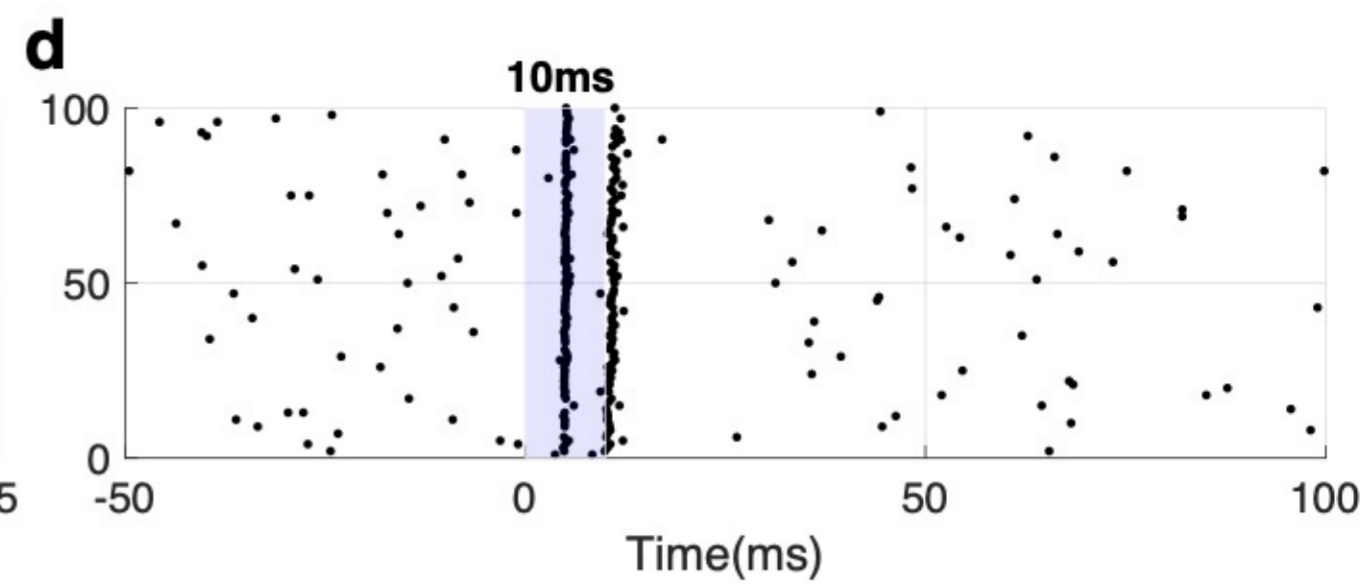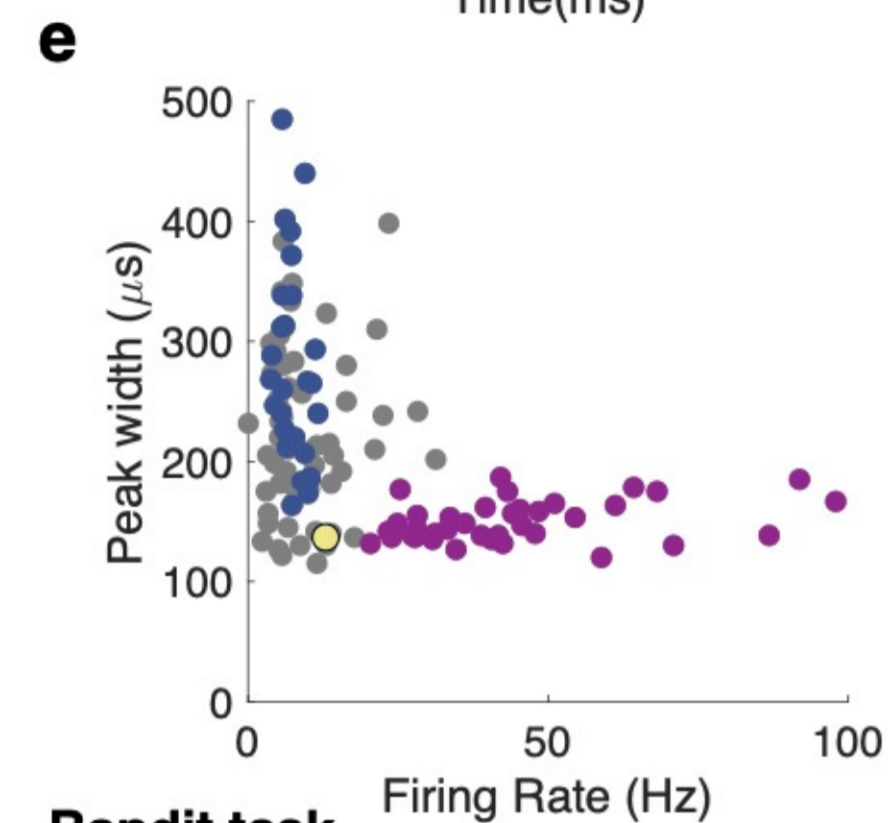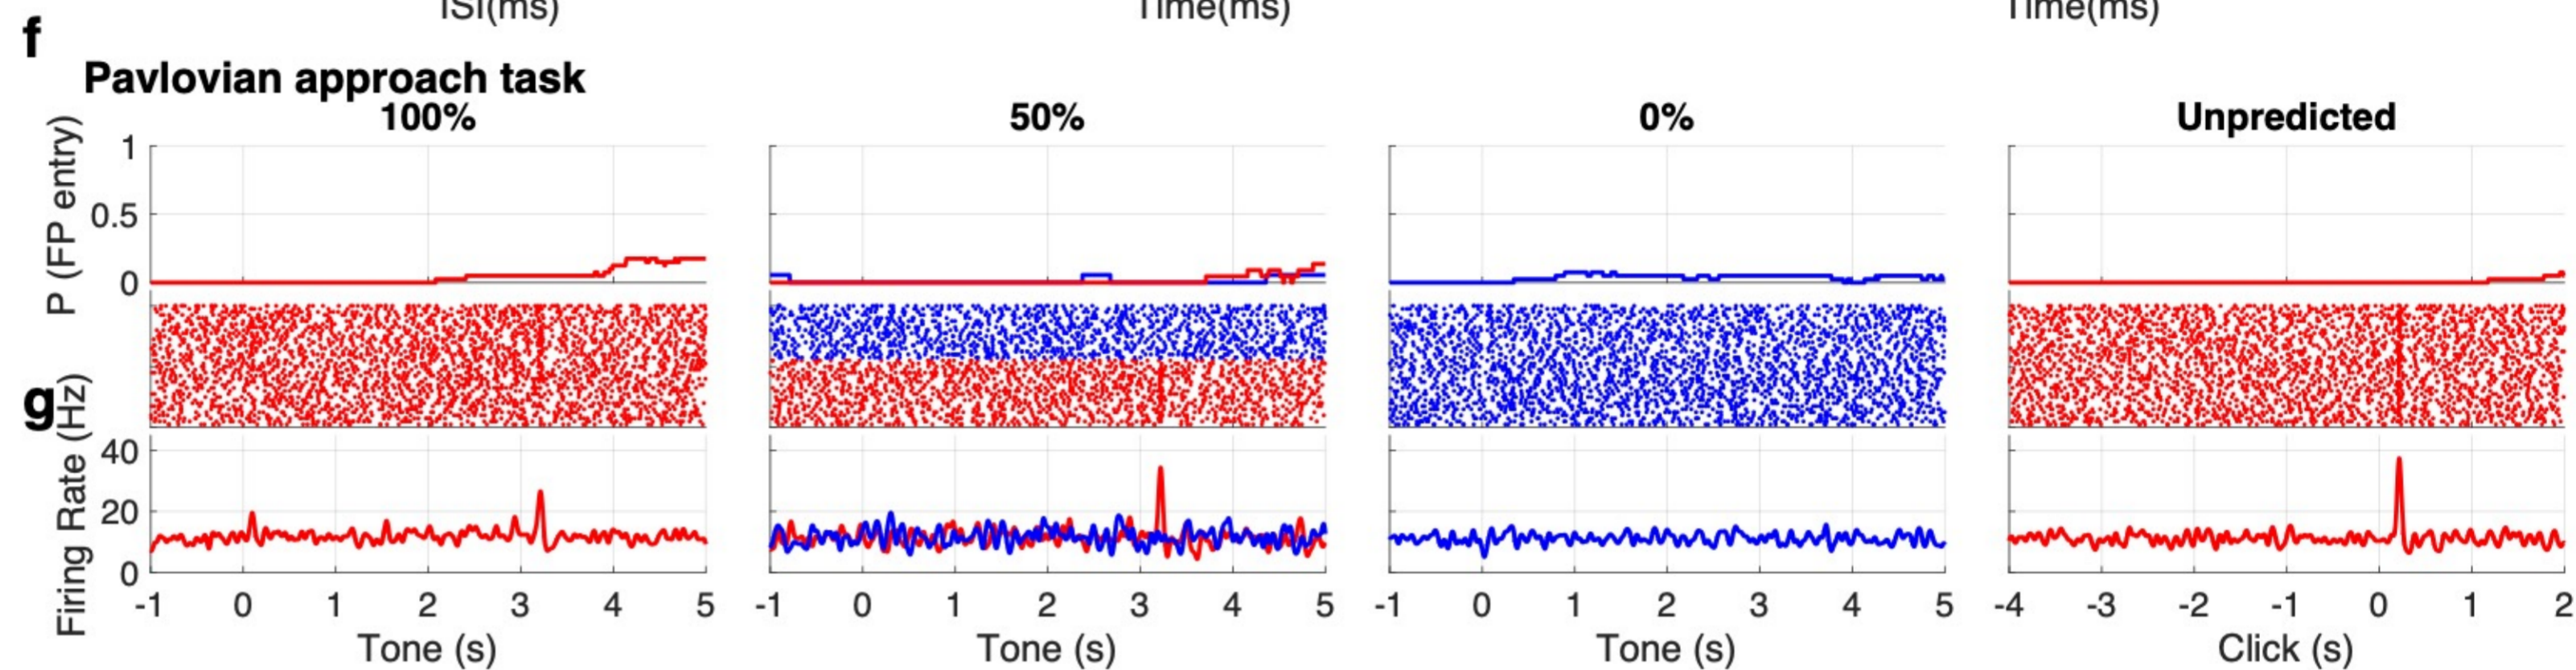

## Bandit task

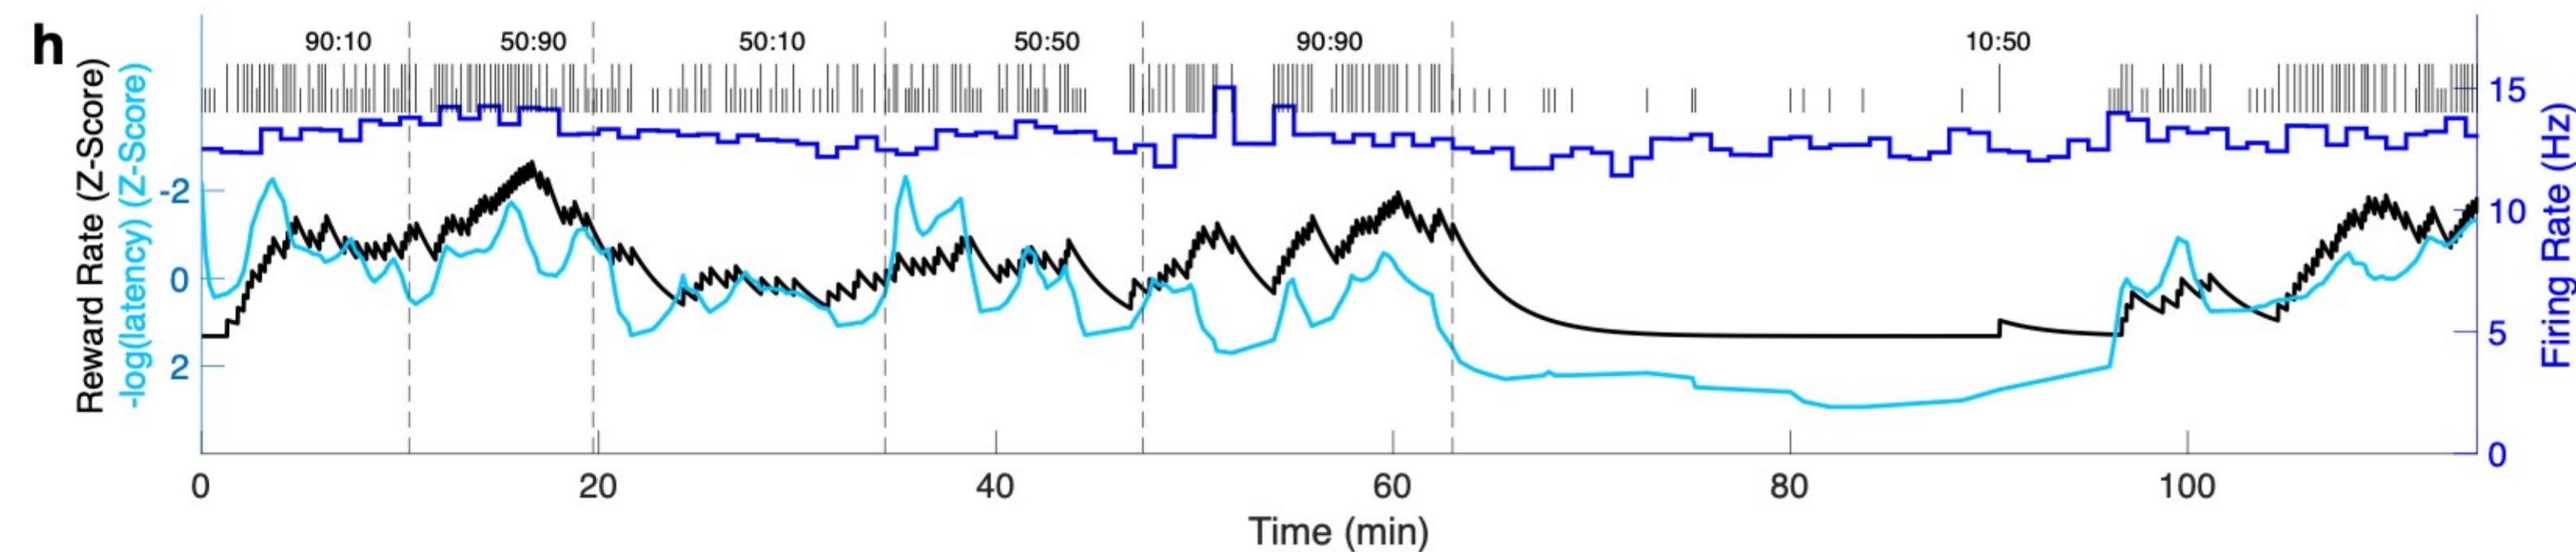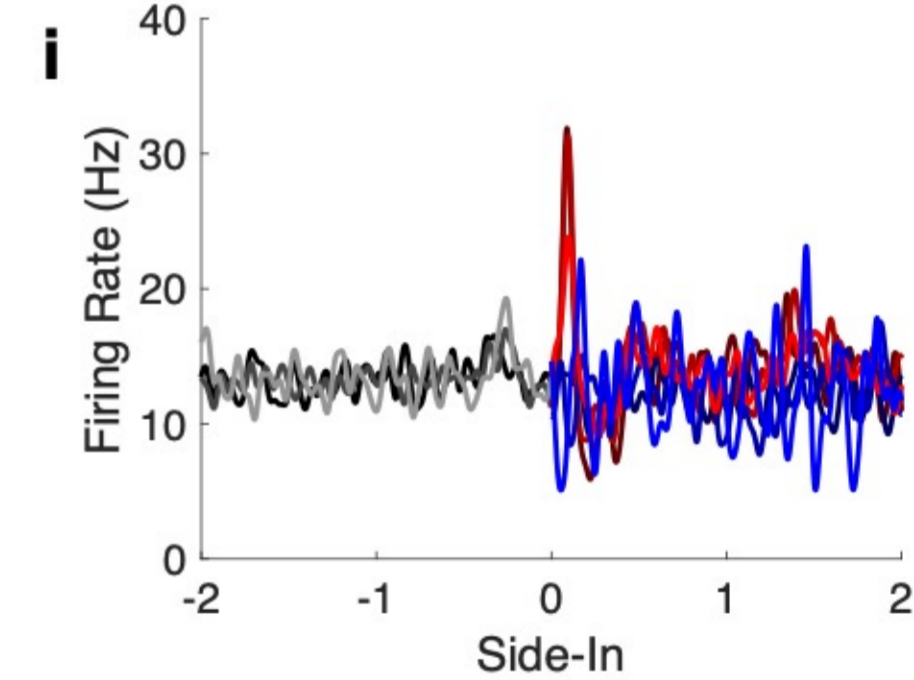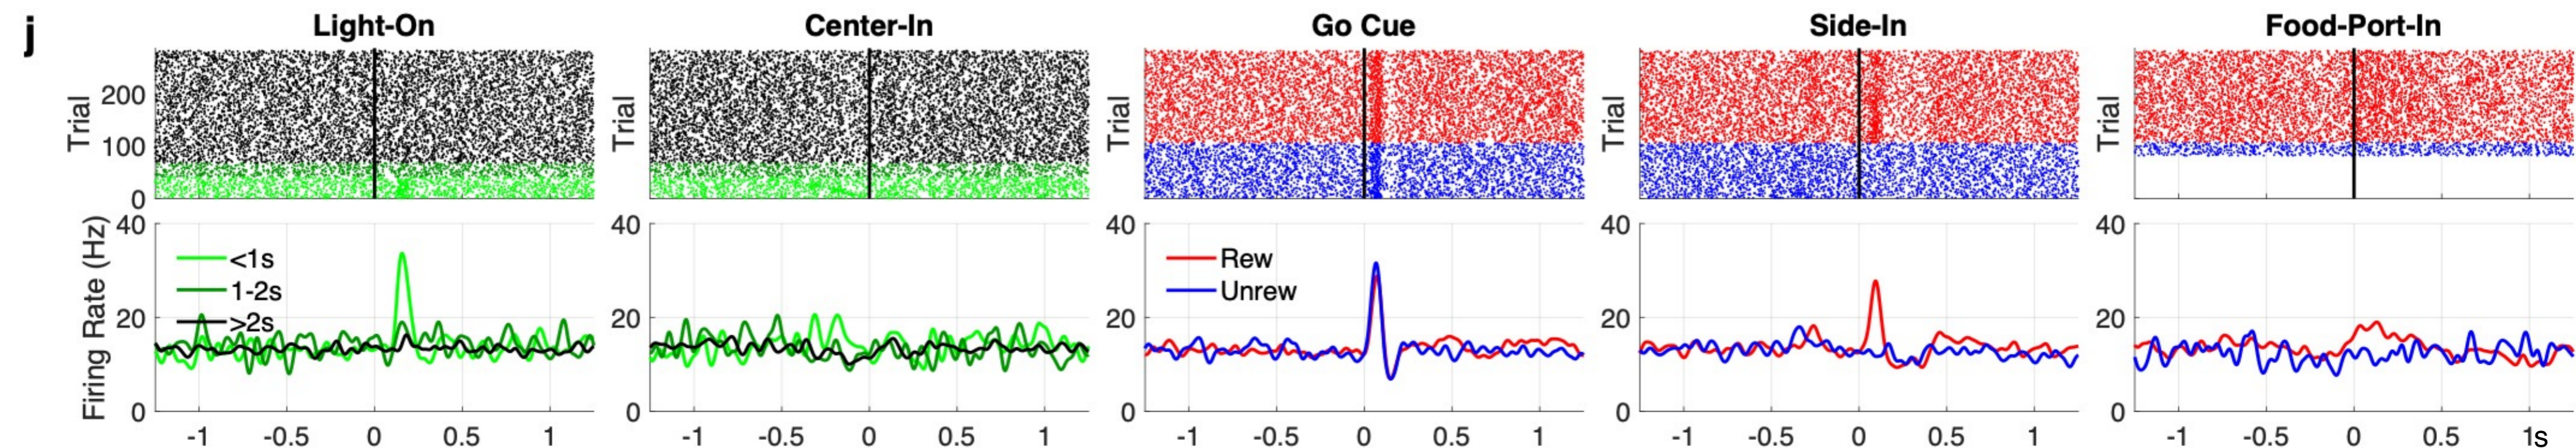

# Neuron properties and Identification

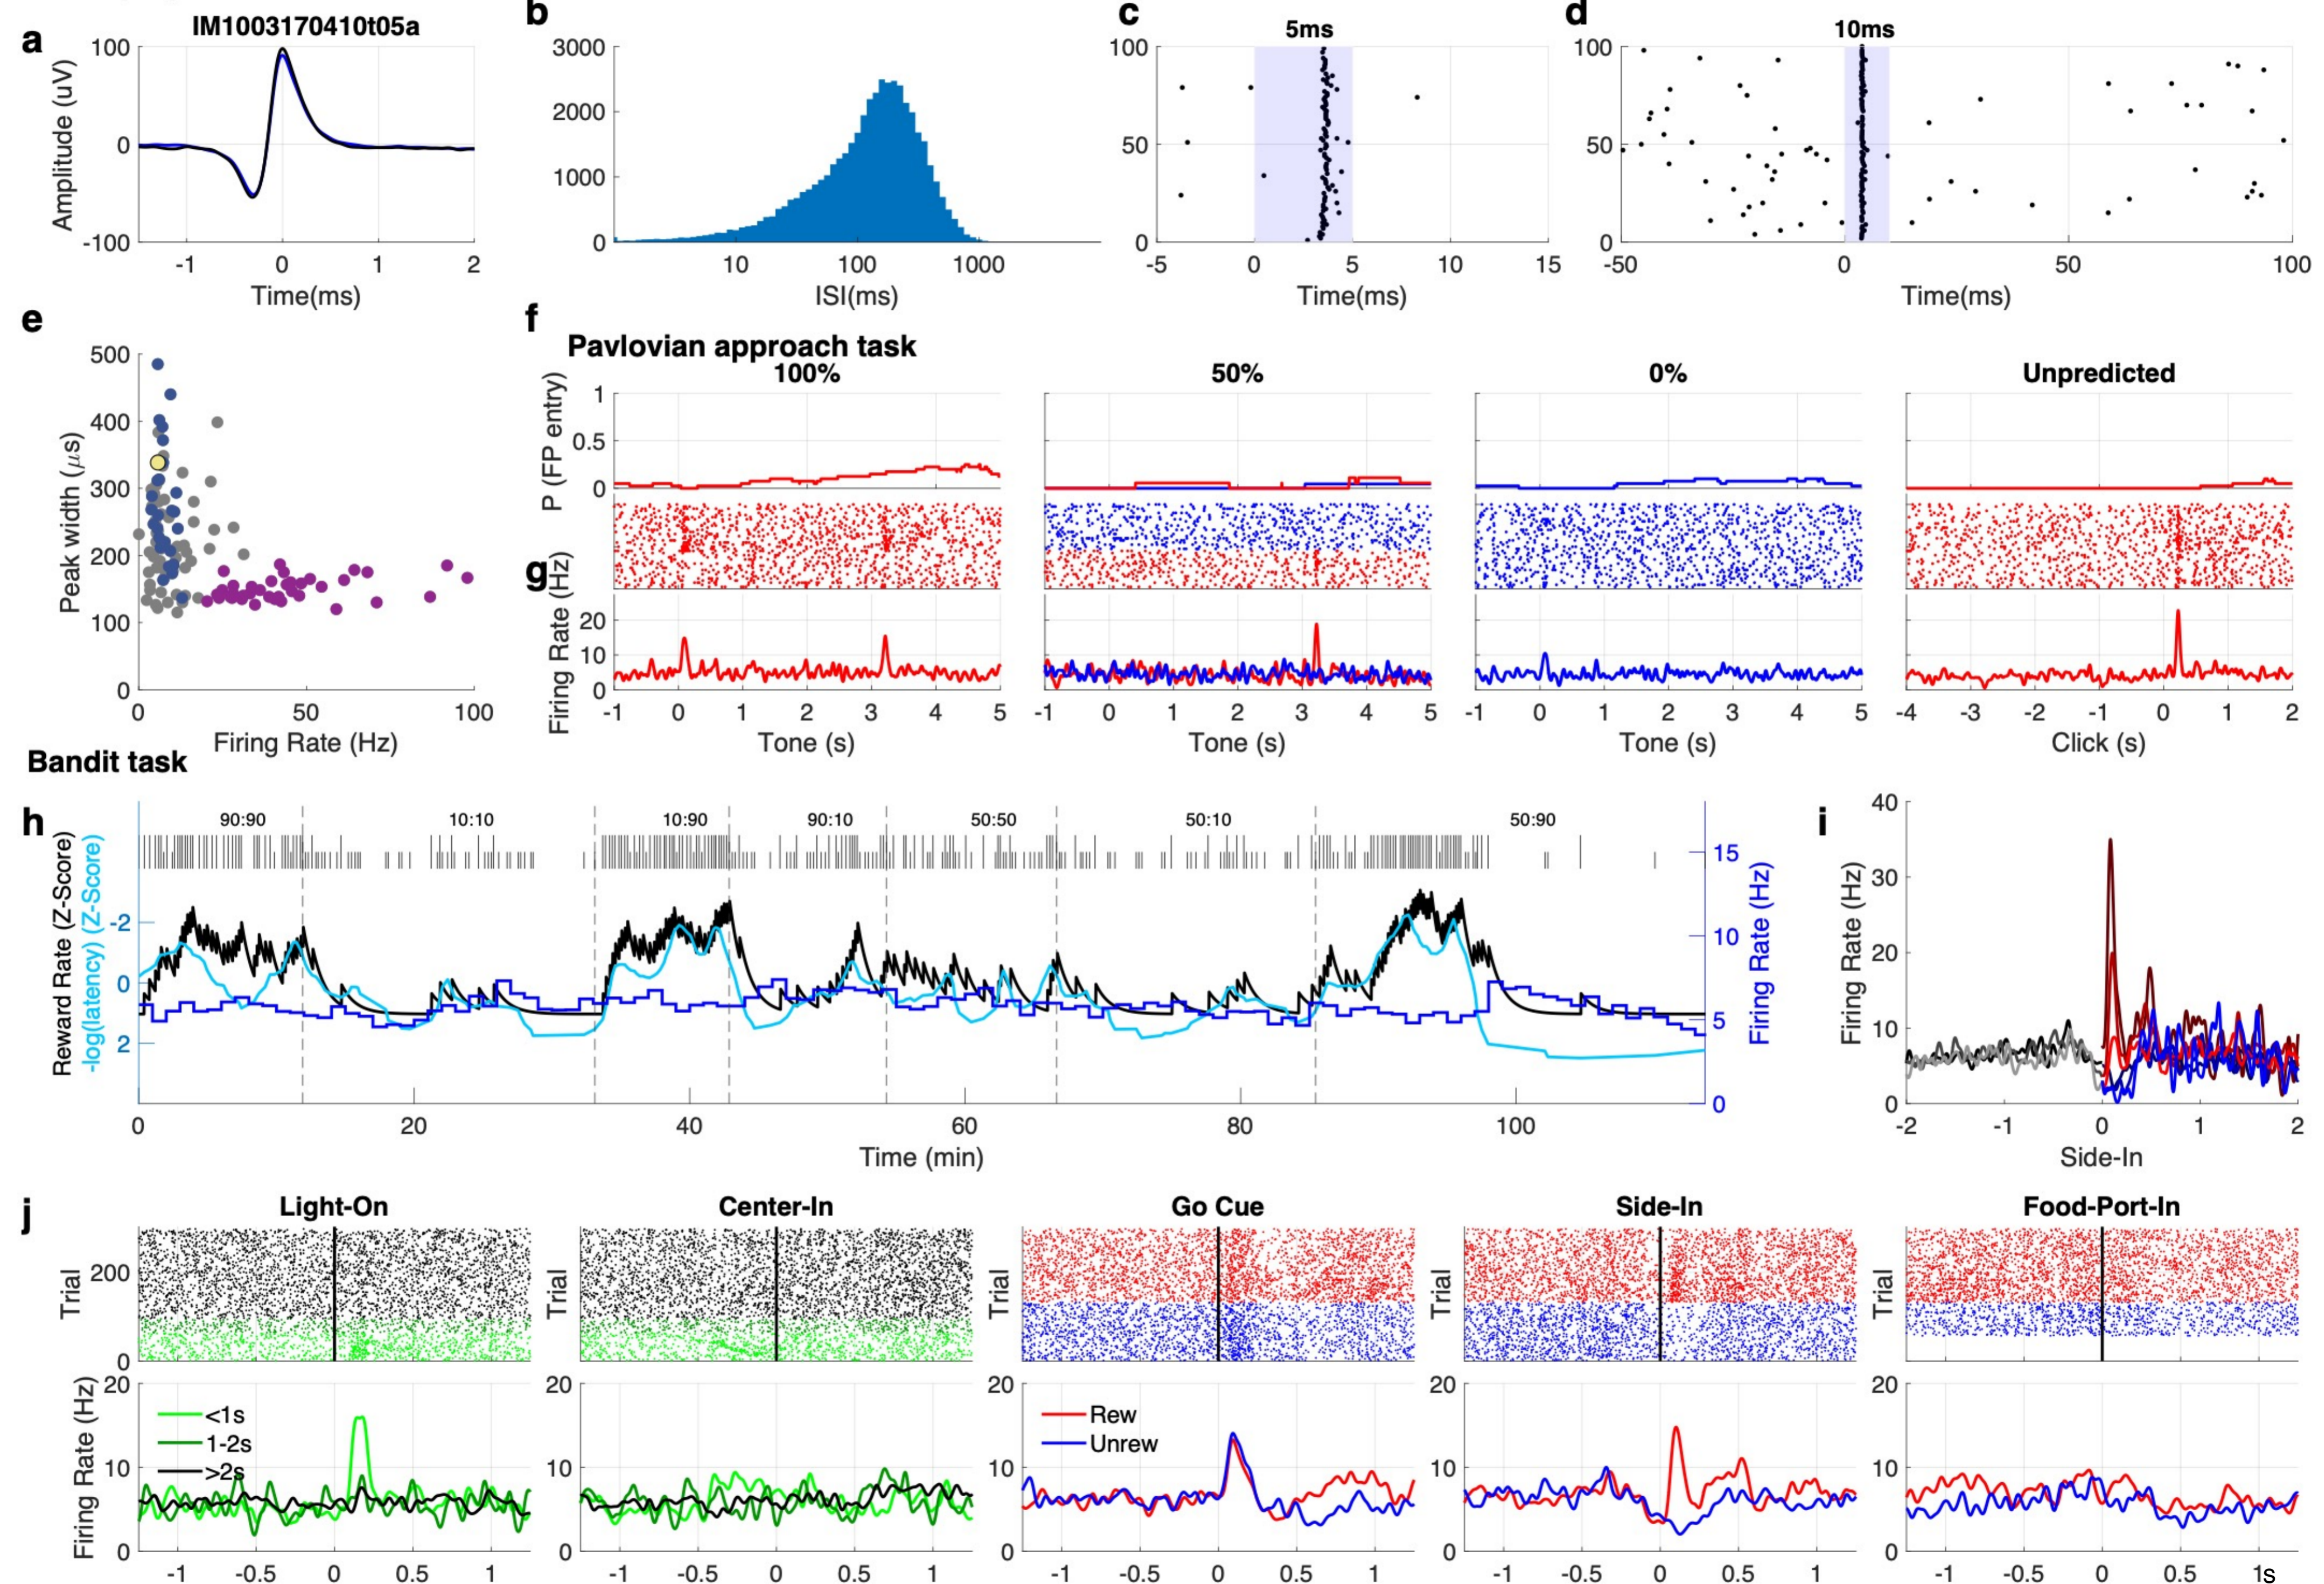

# Neuron properties and Identification

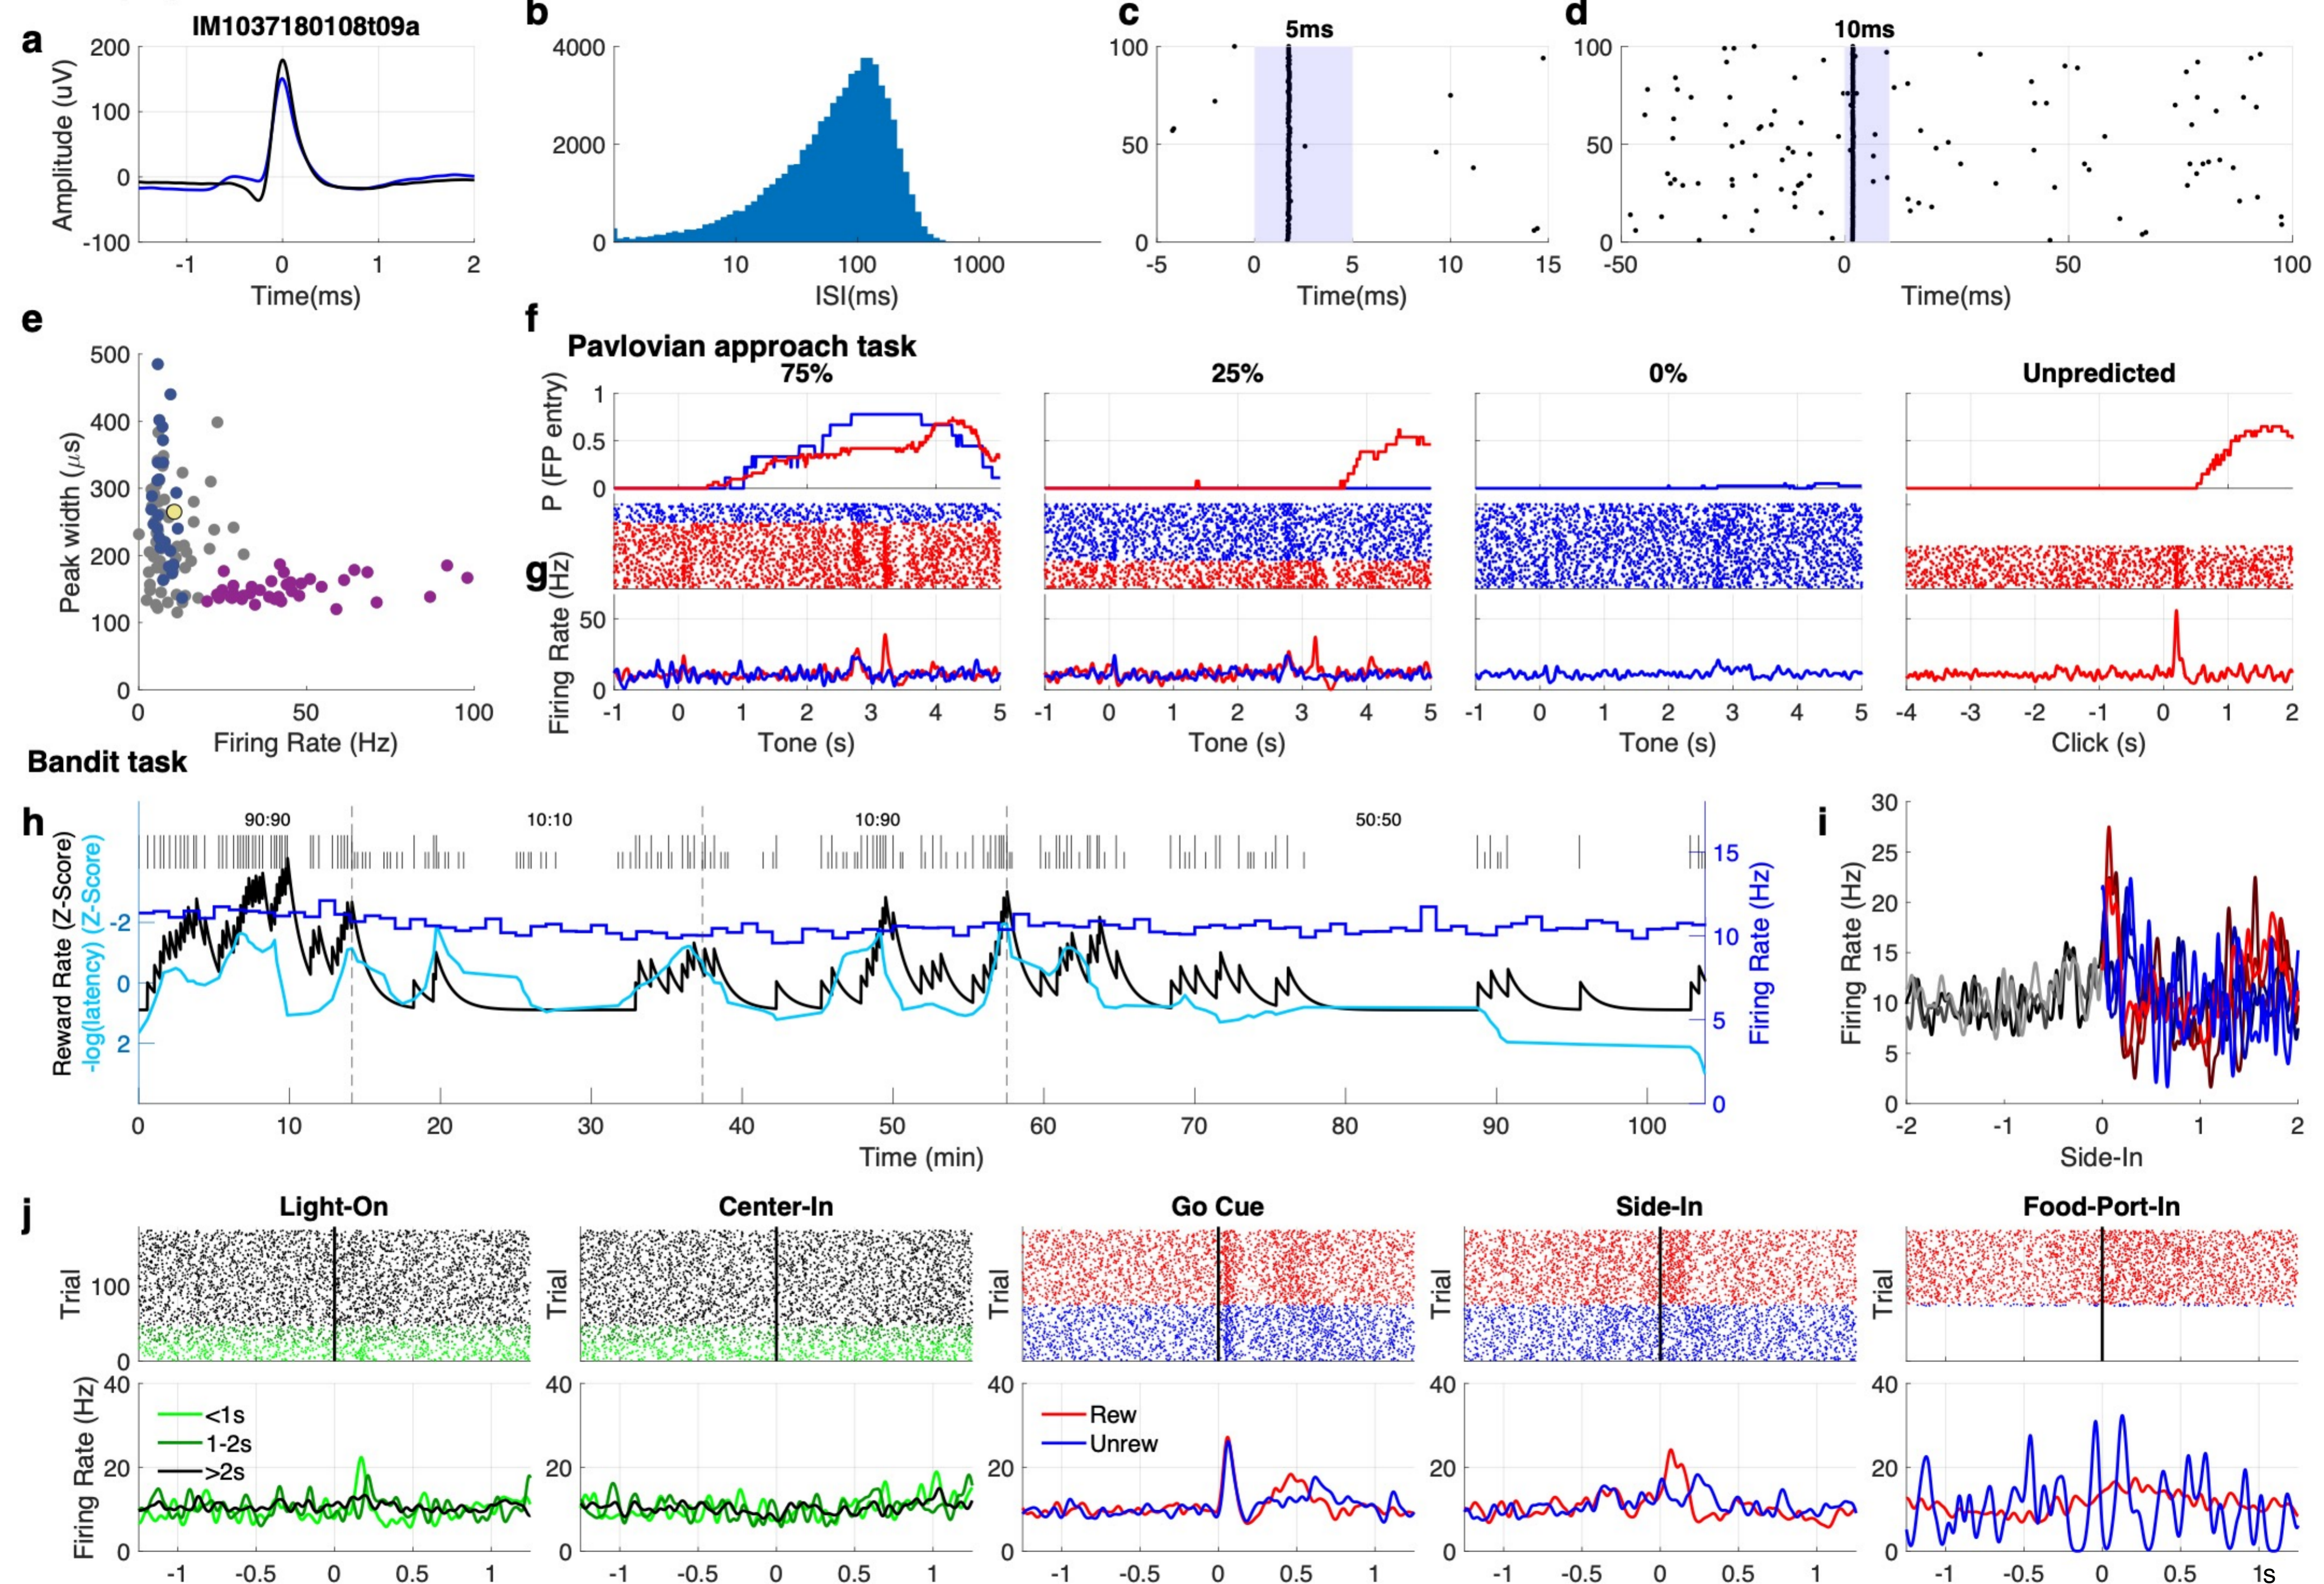

# Neuron properties and Identification

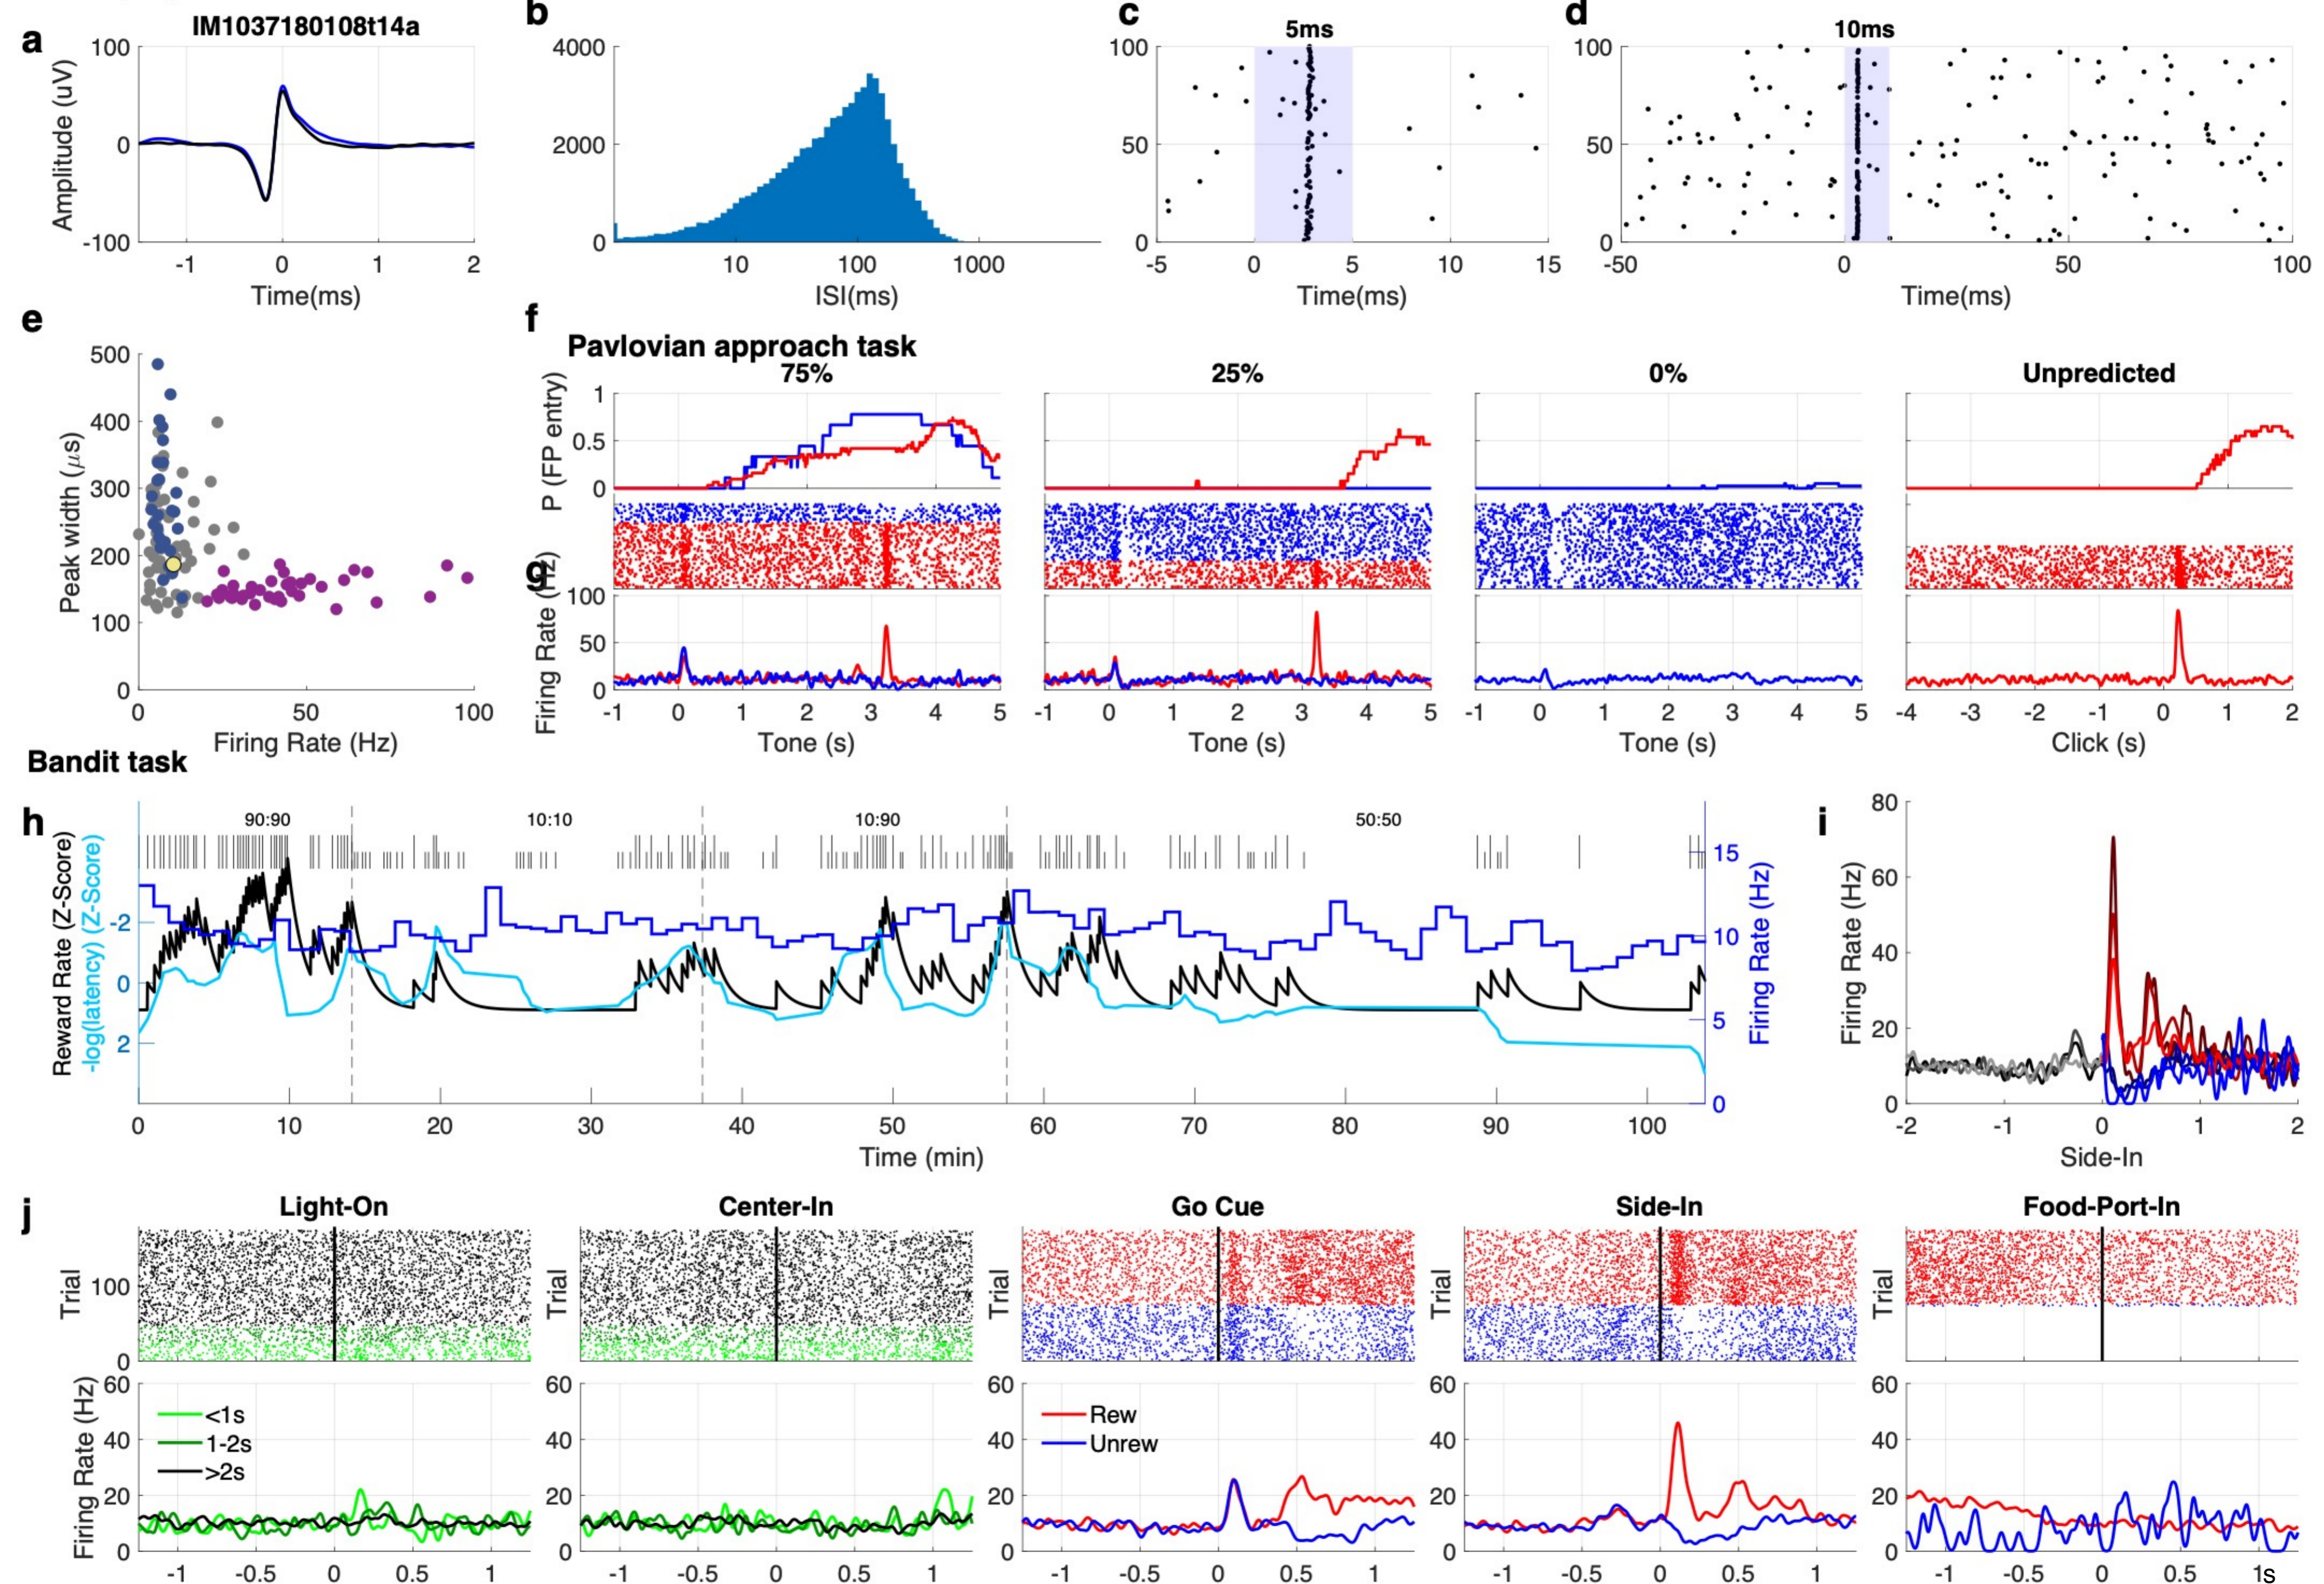

# Neuron properties and Identification

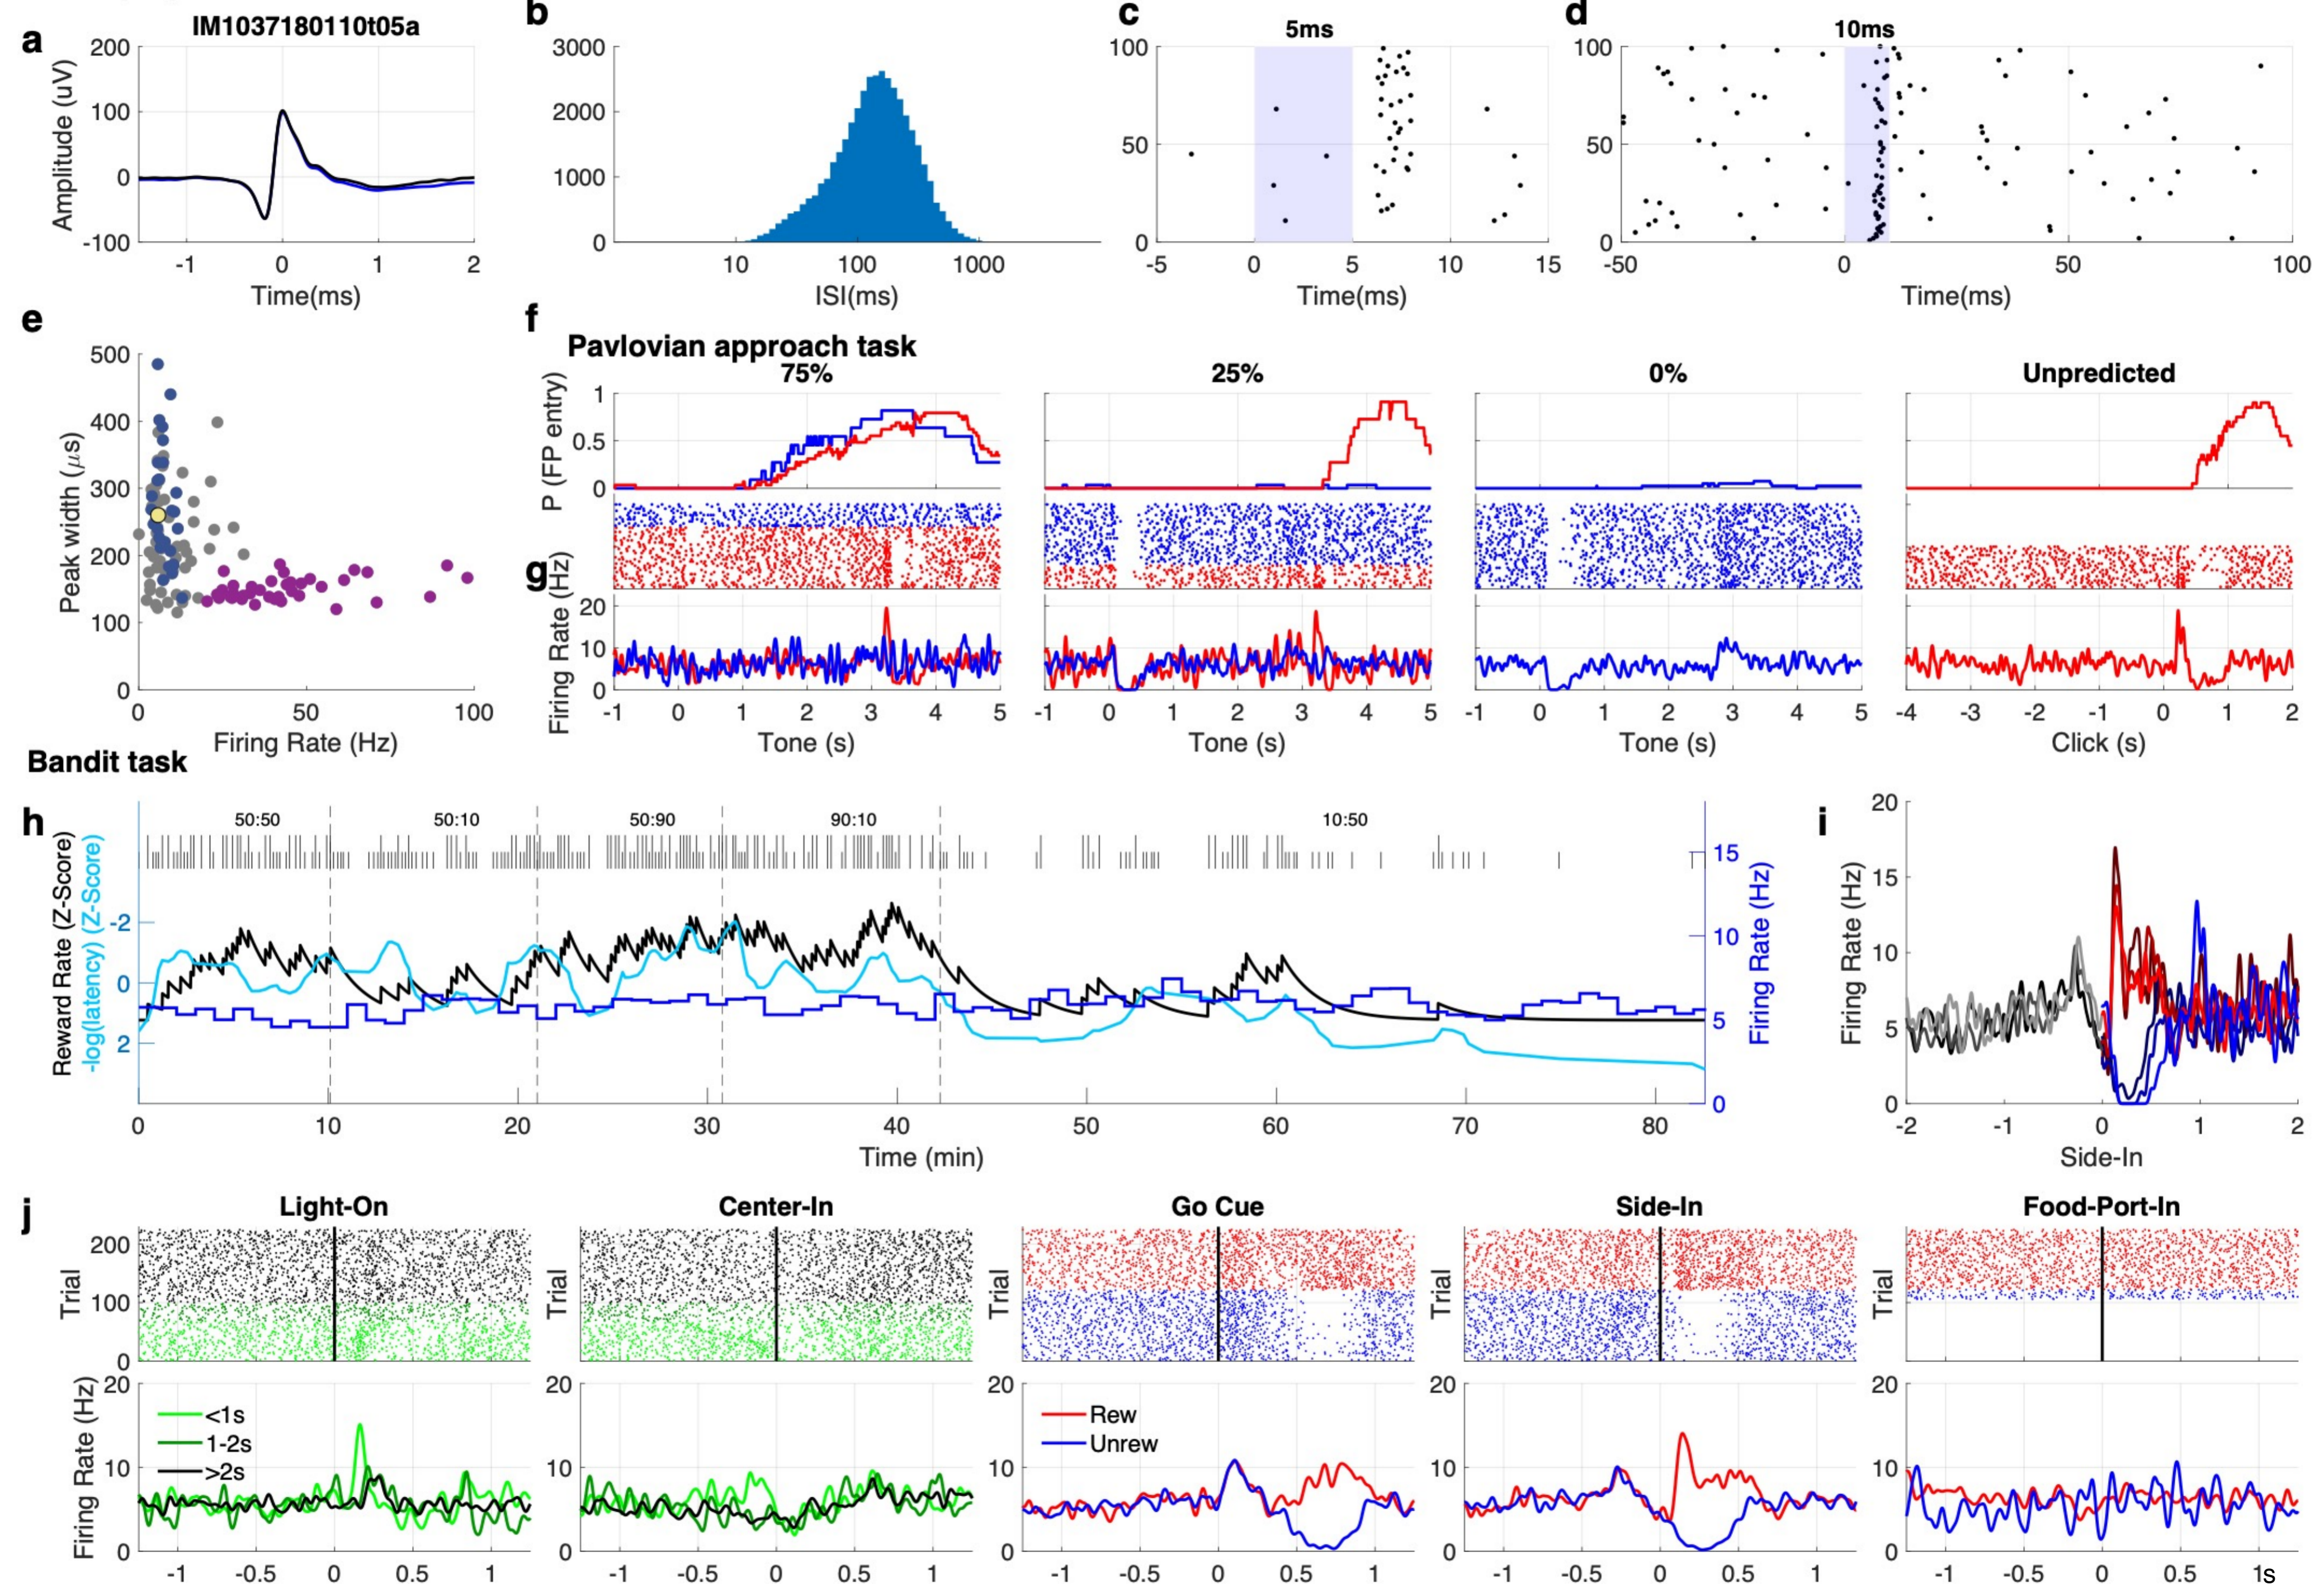

# Neuron properties and Identification

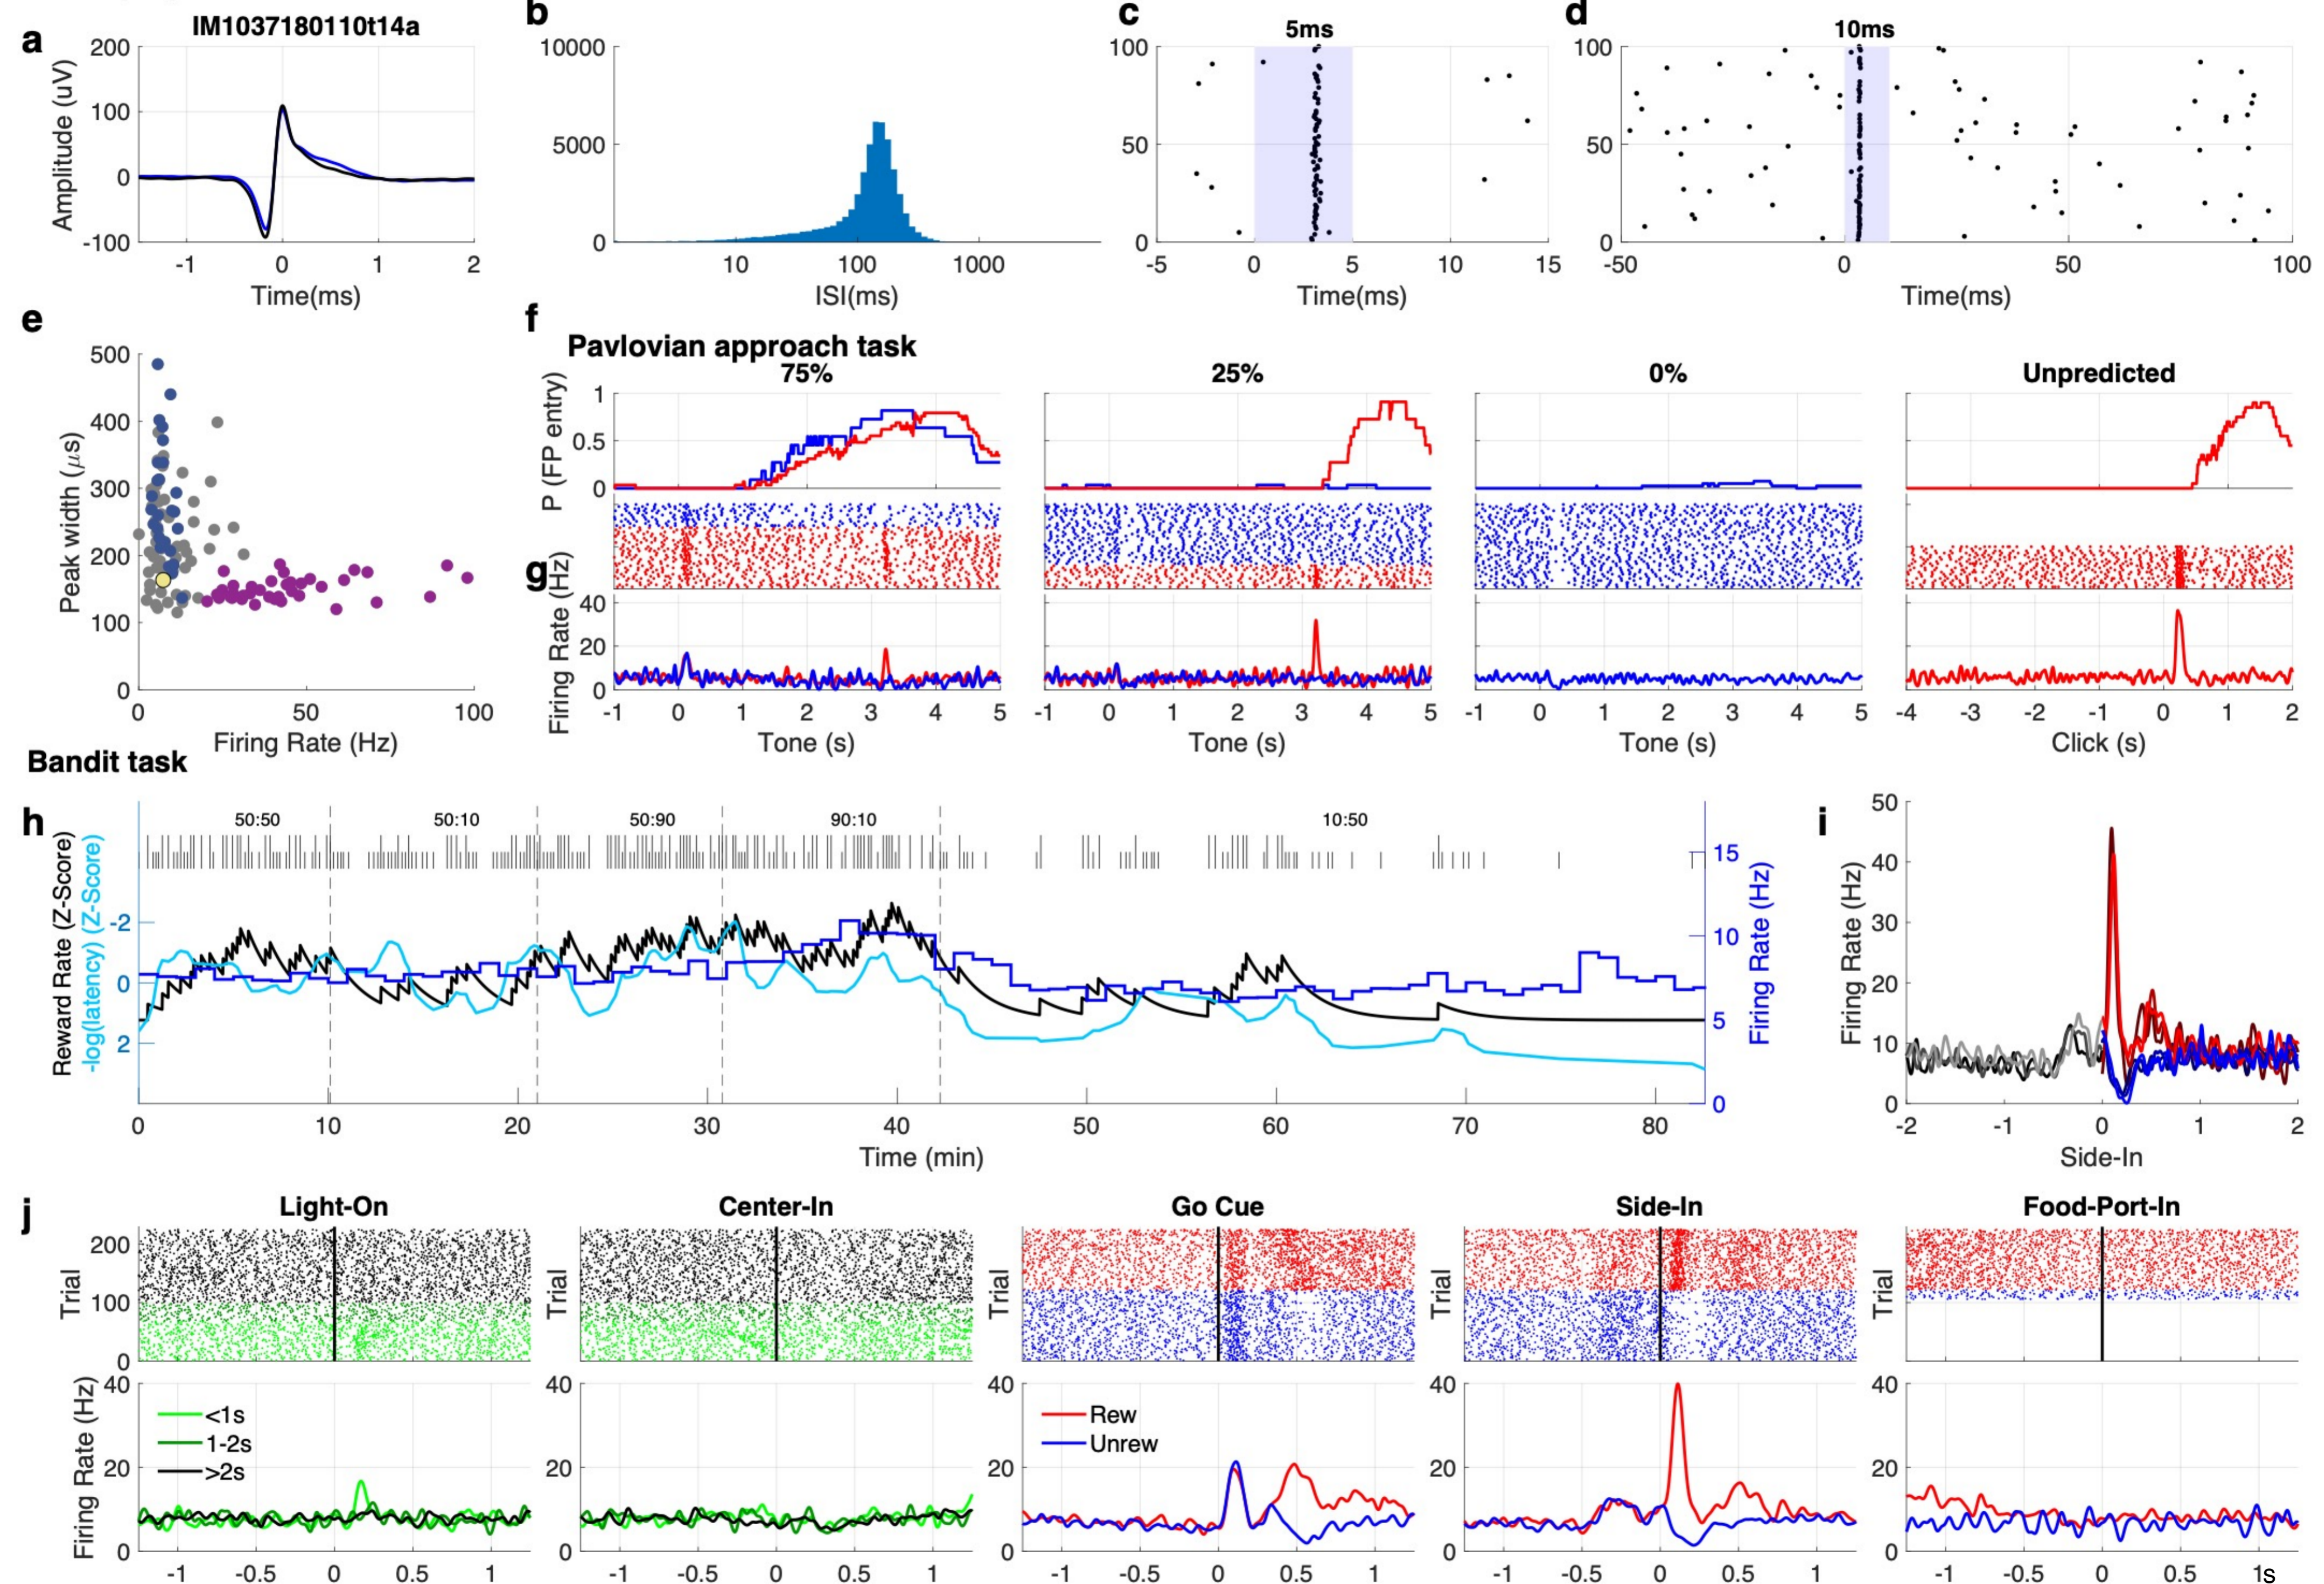

# Neuron properties and Identification

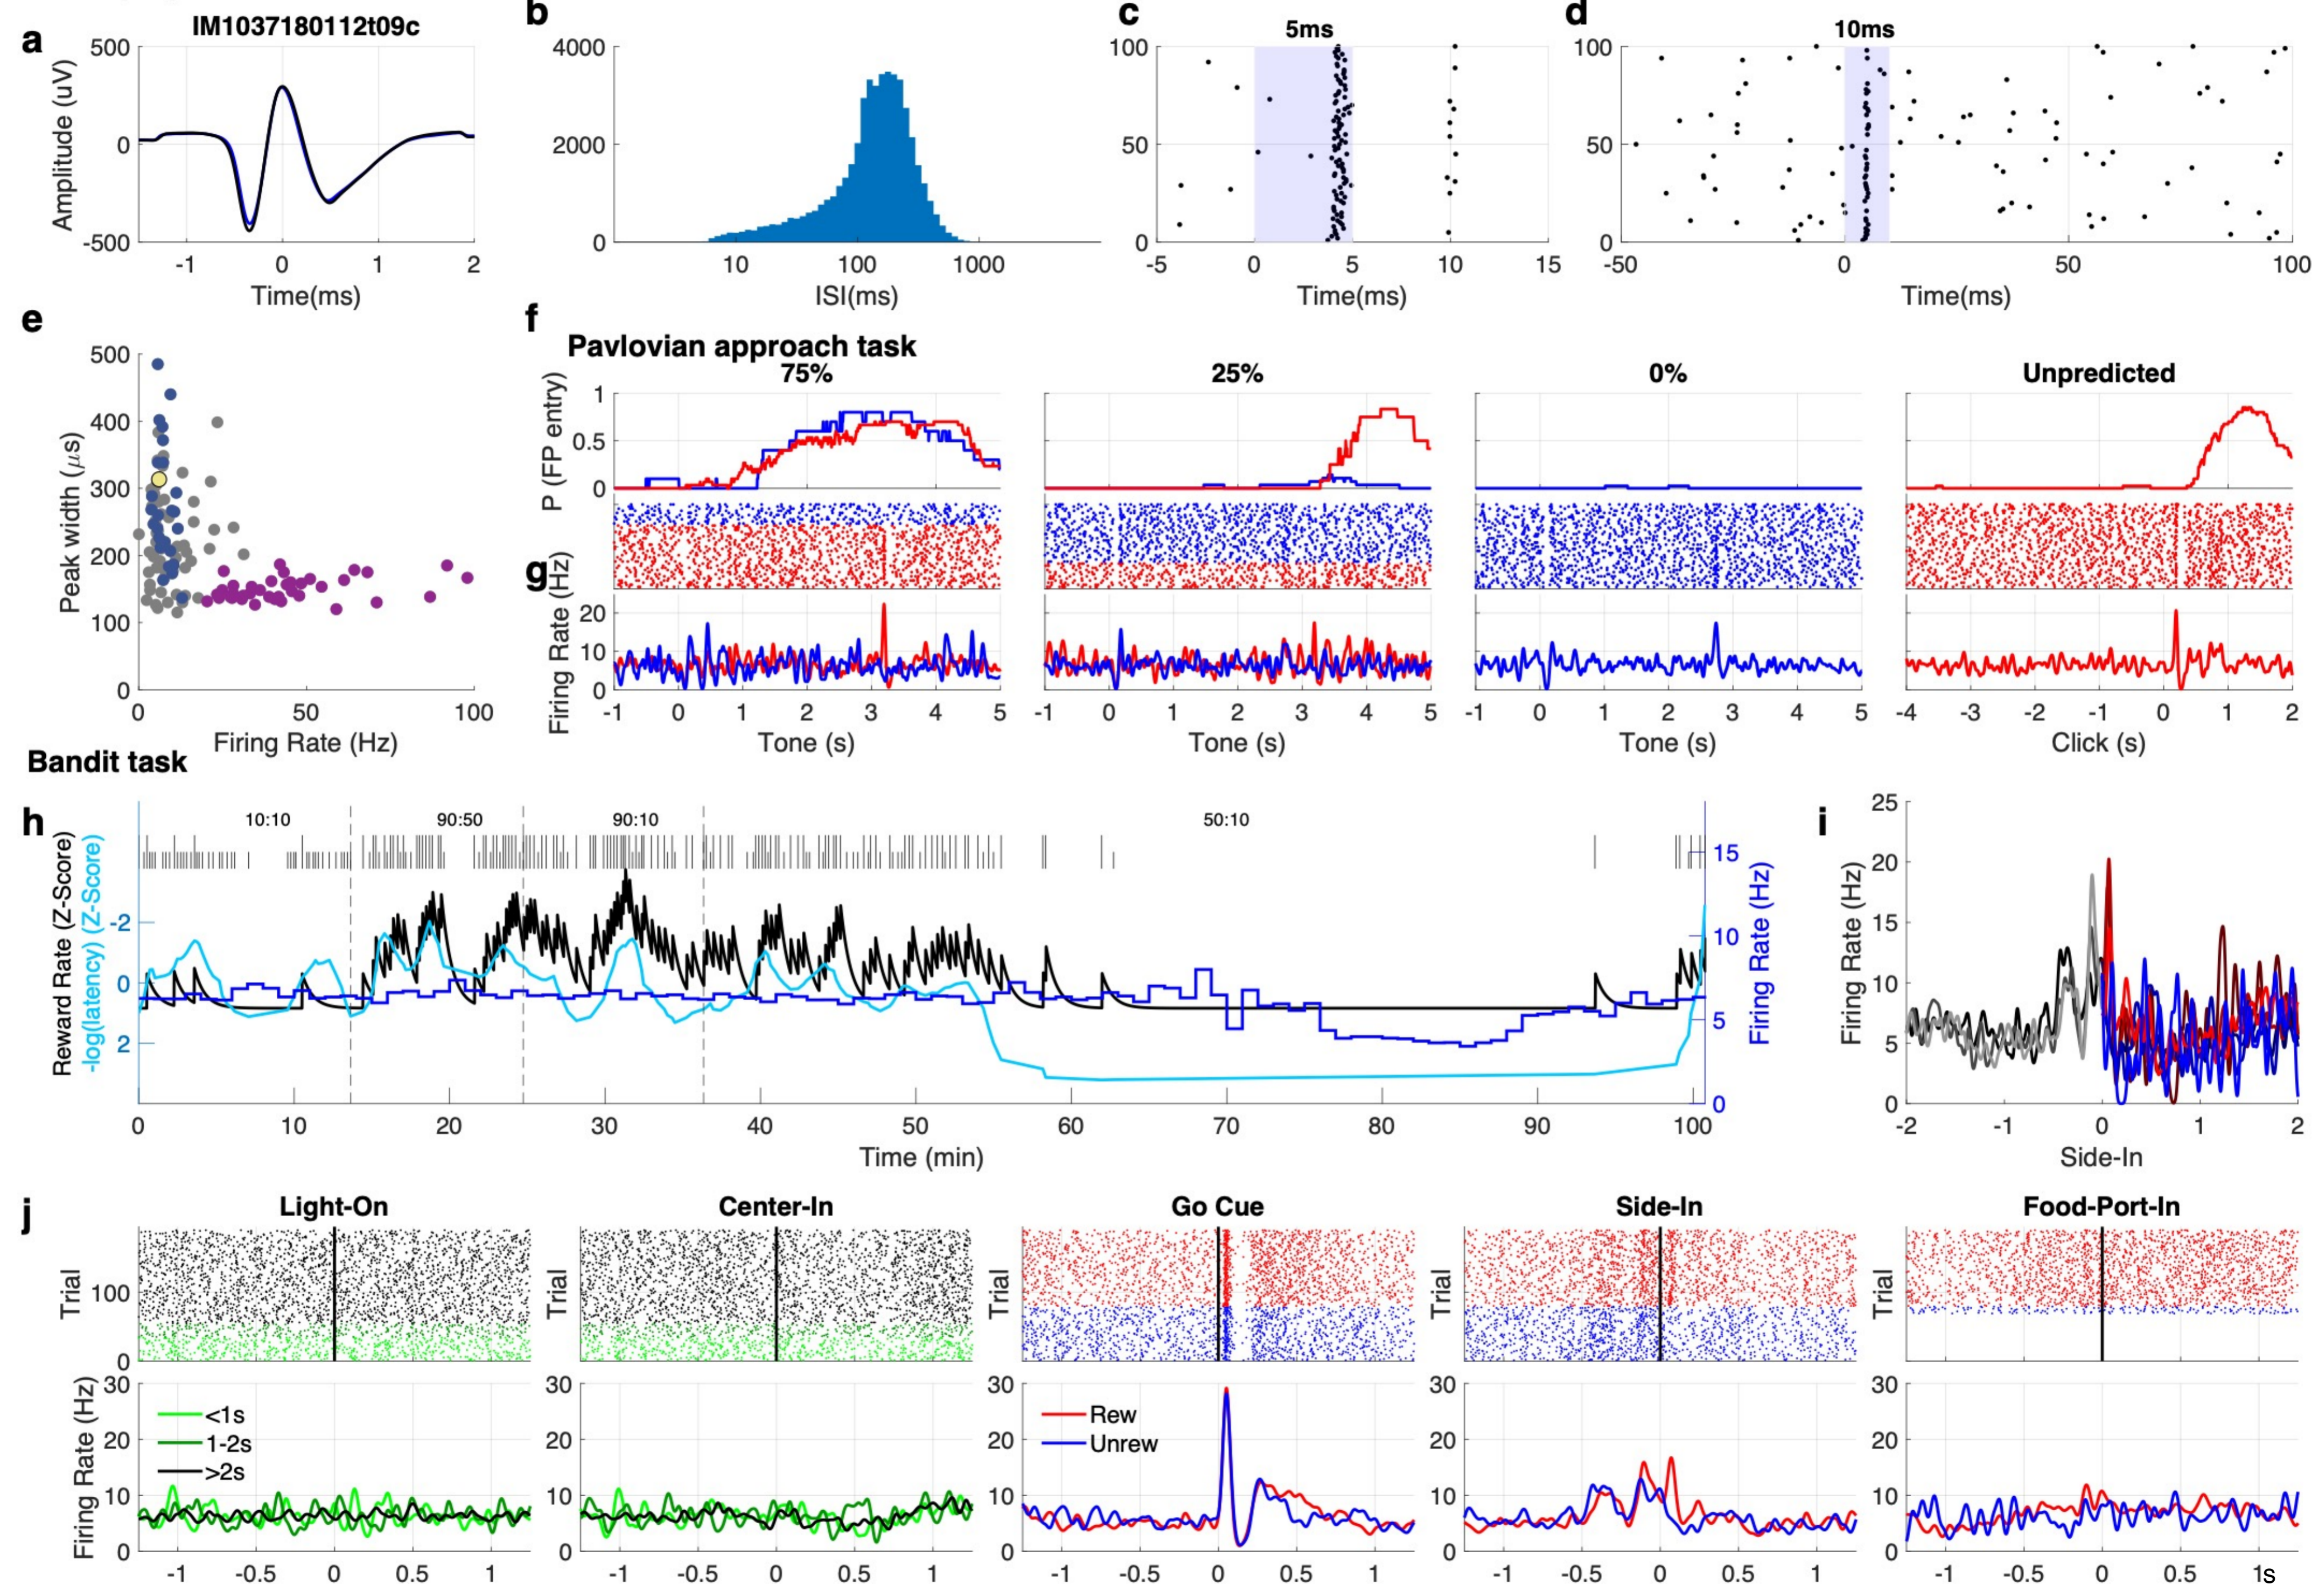



# Neuron properties and Identification

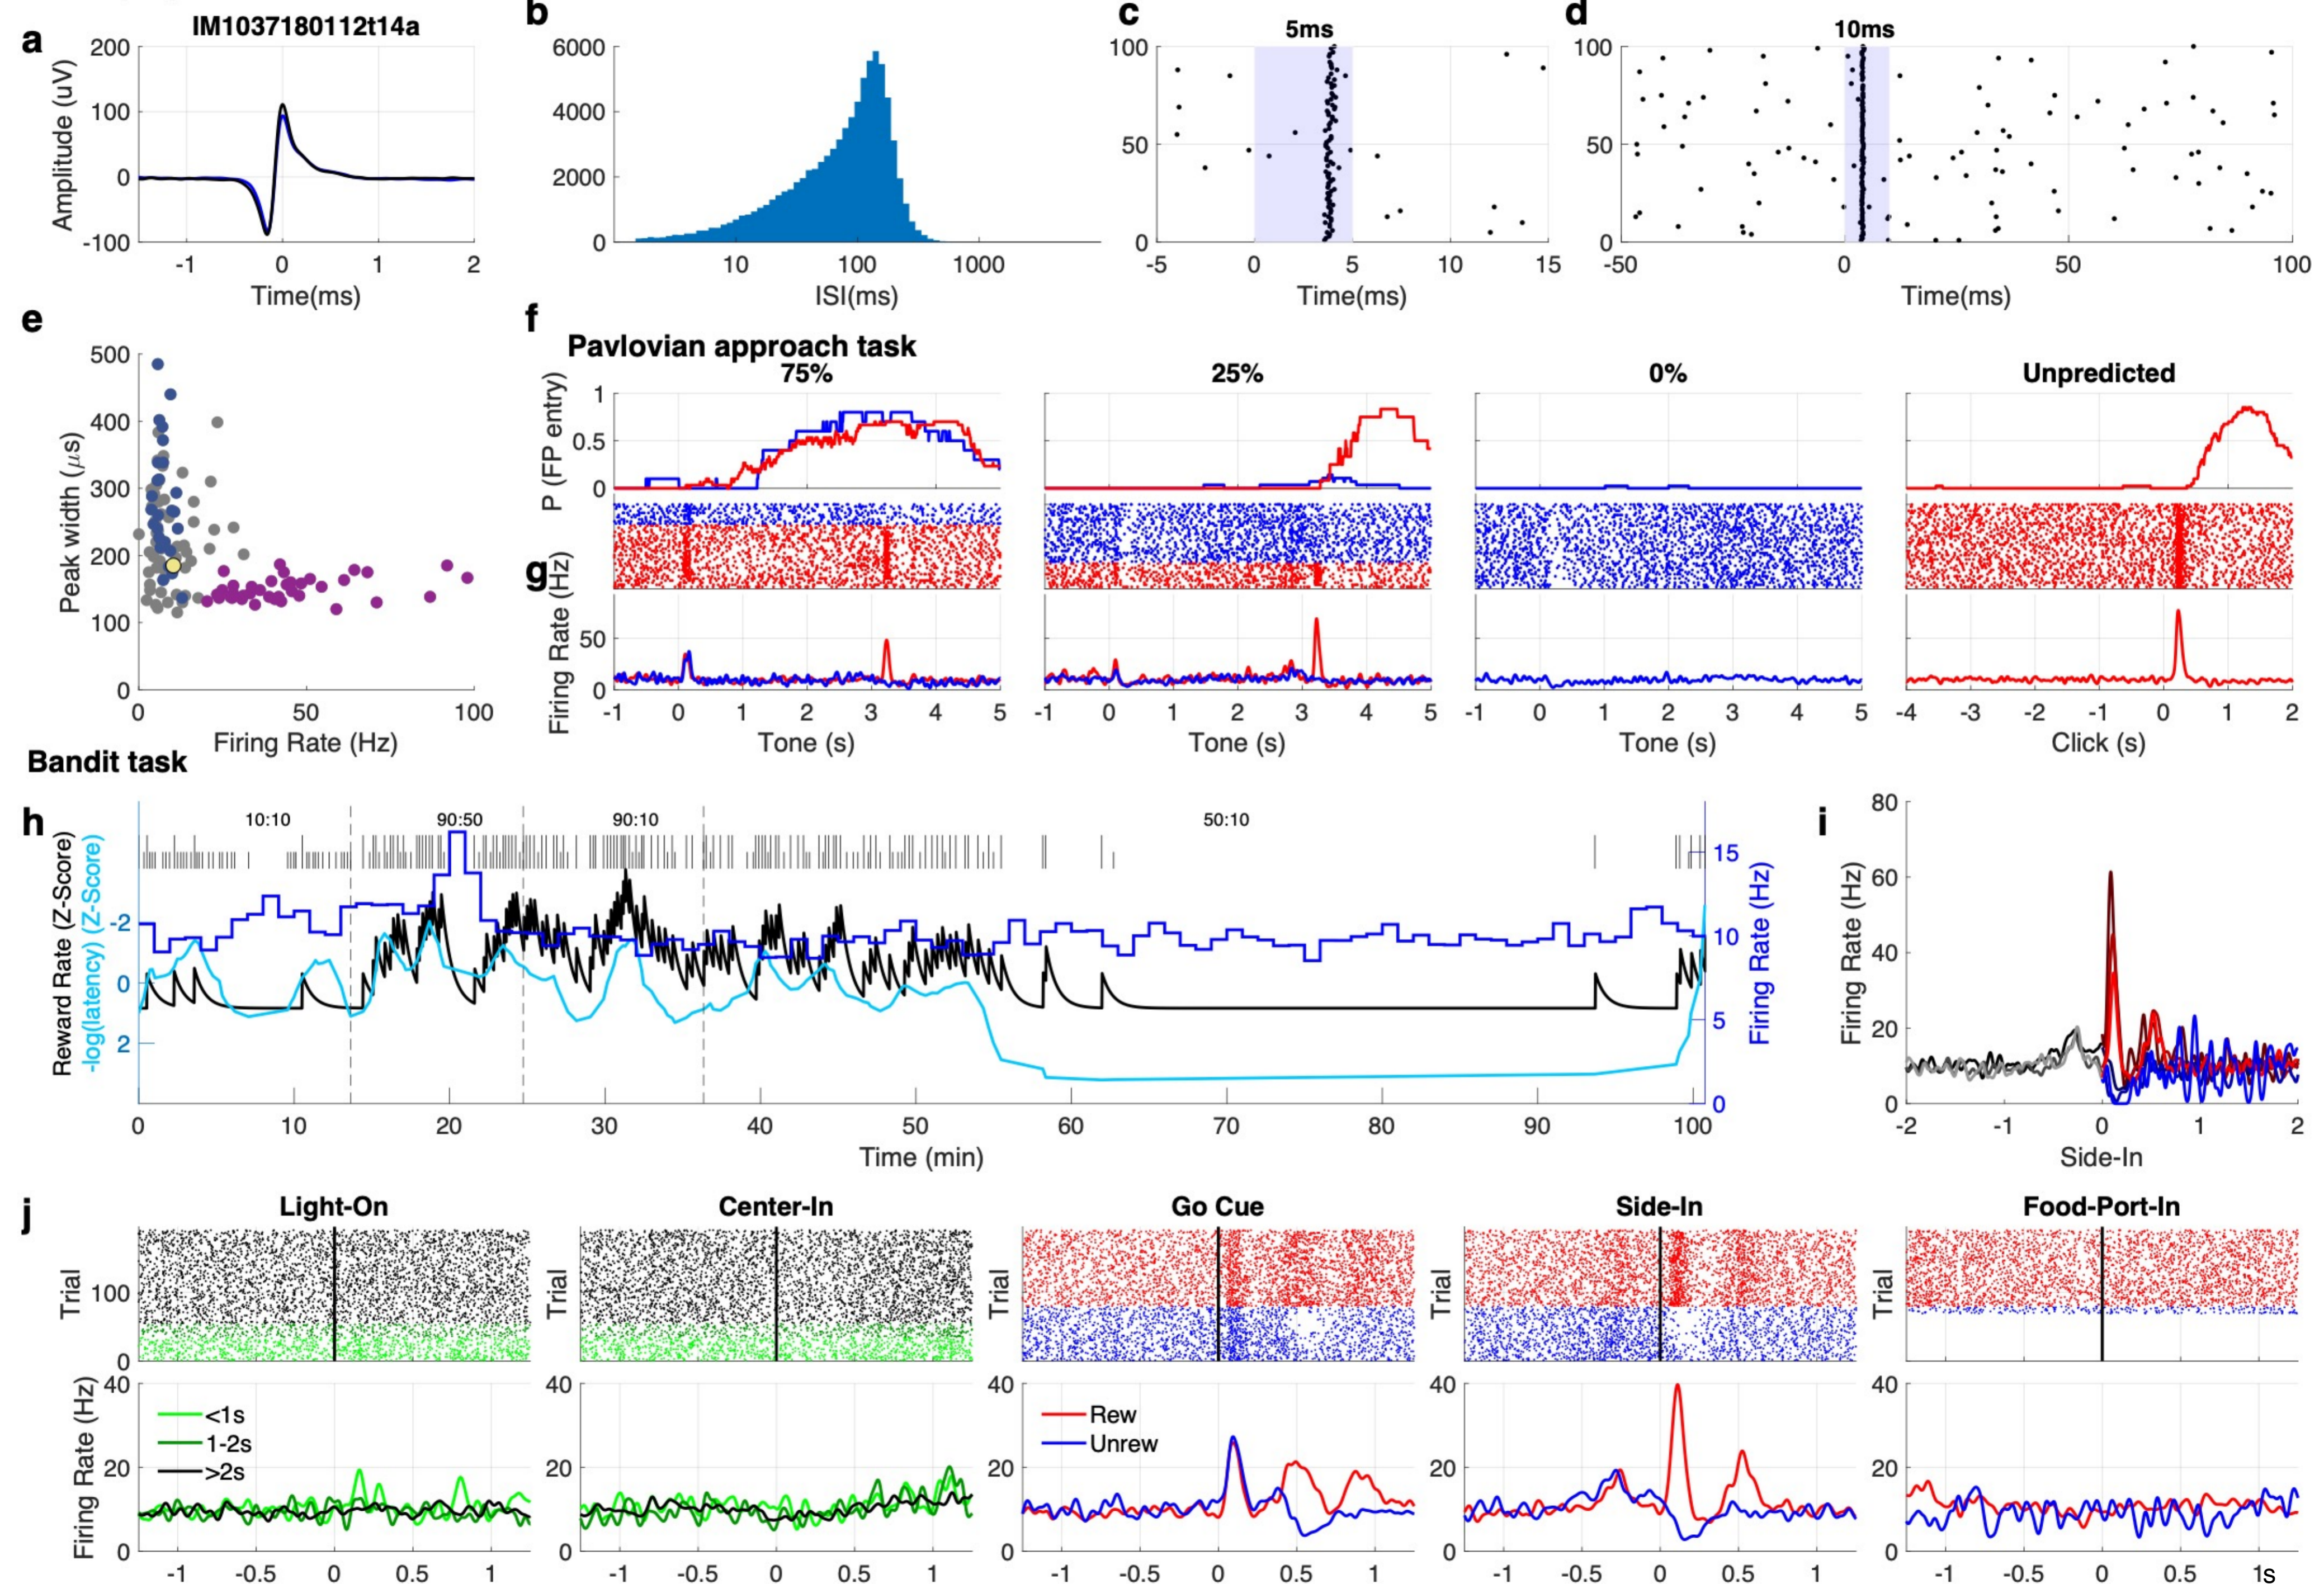

# Neuron properties and Identification

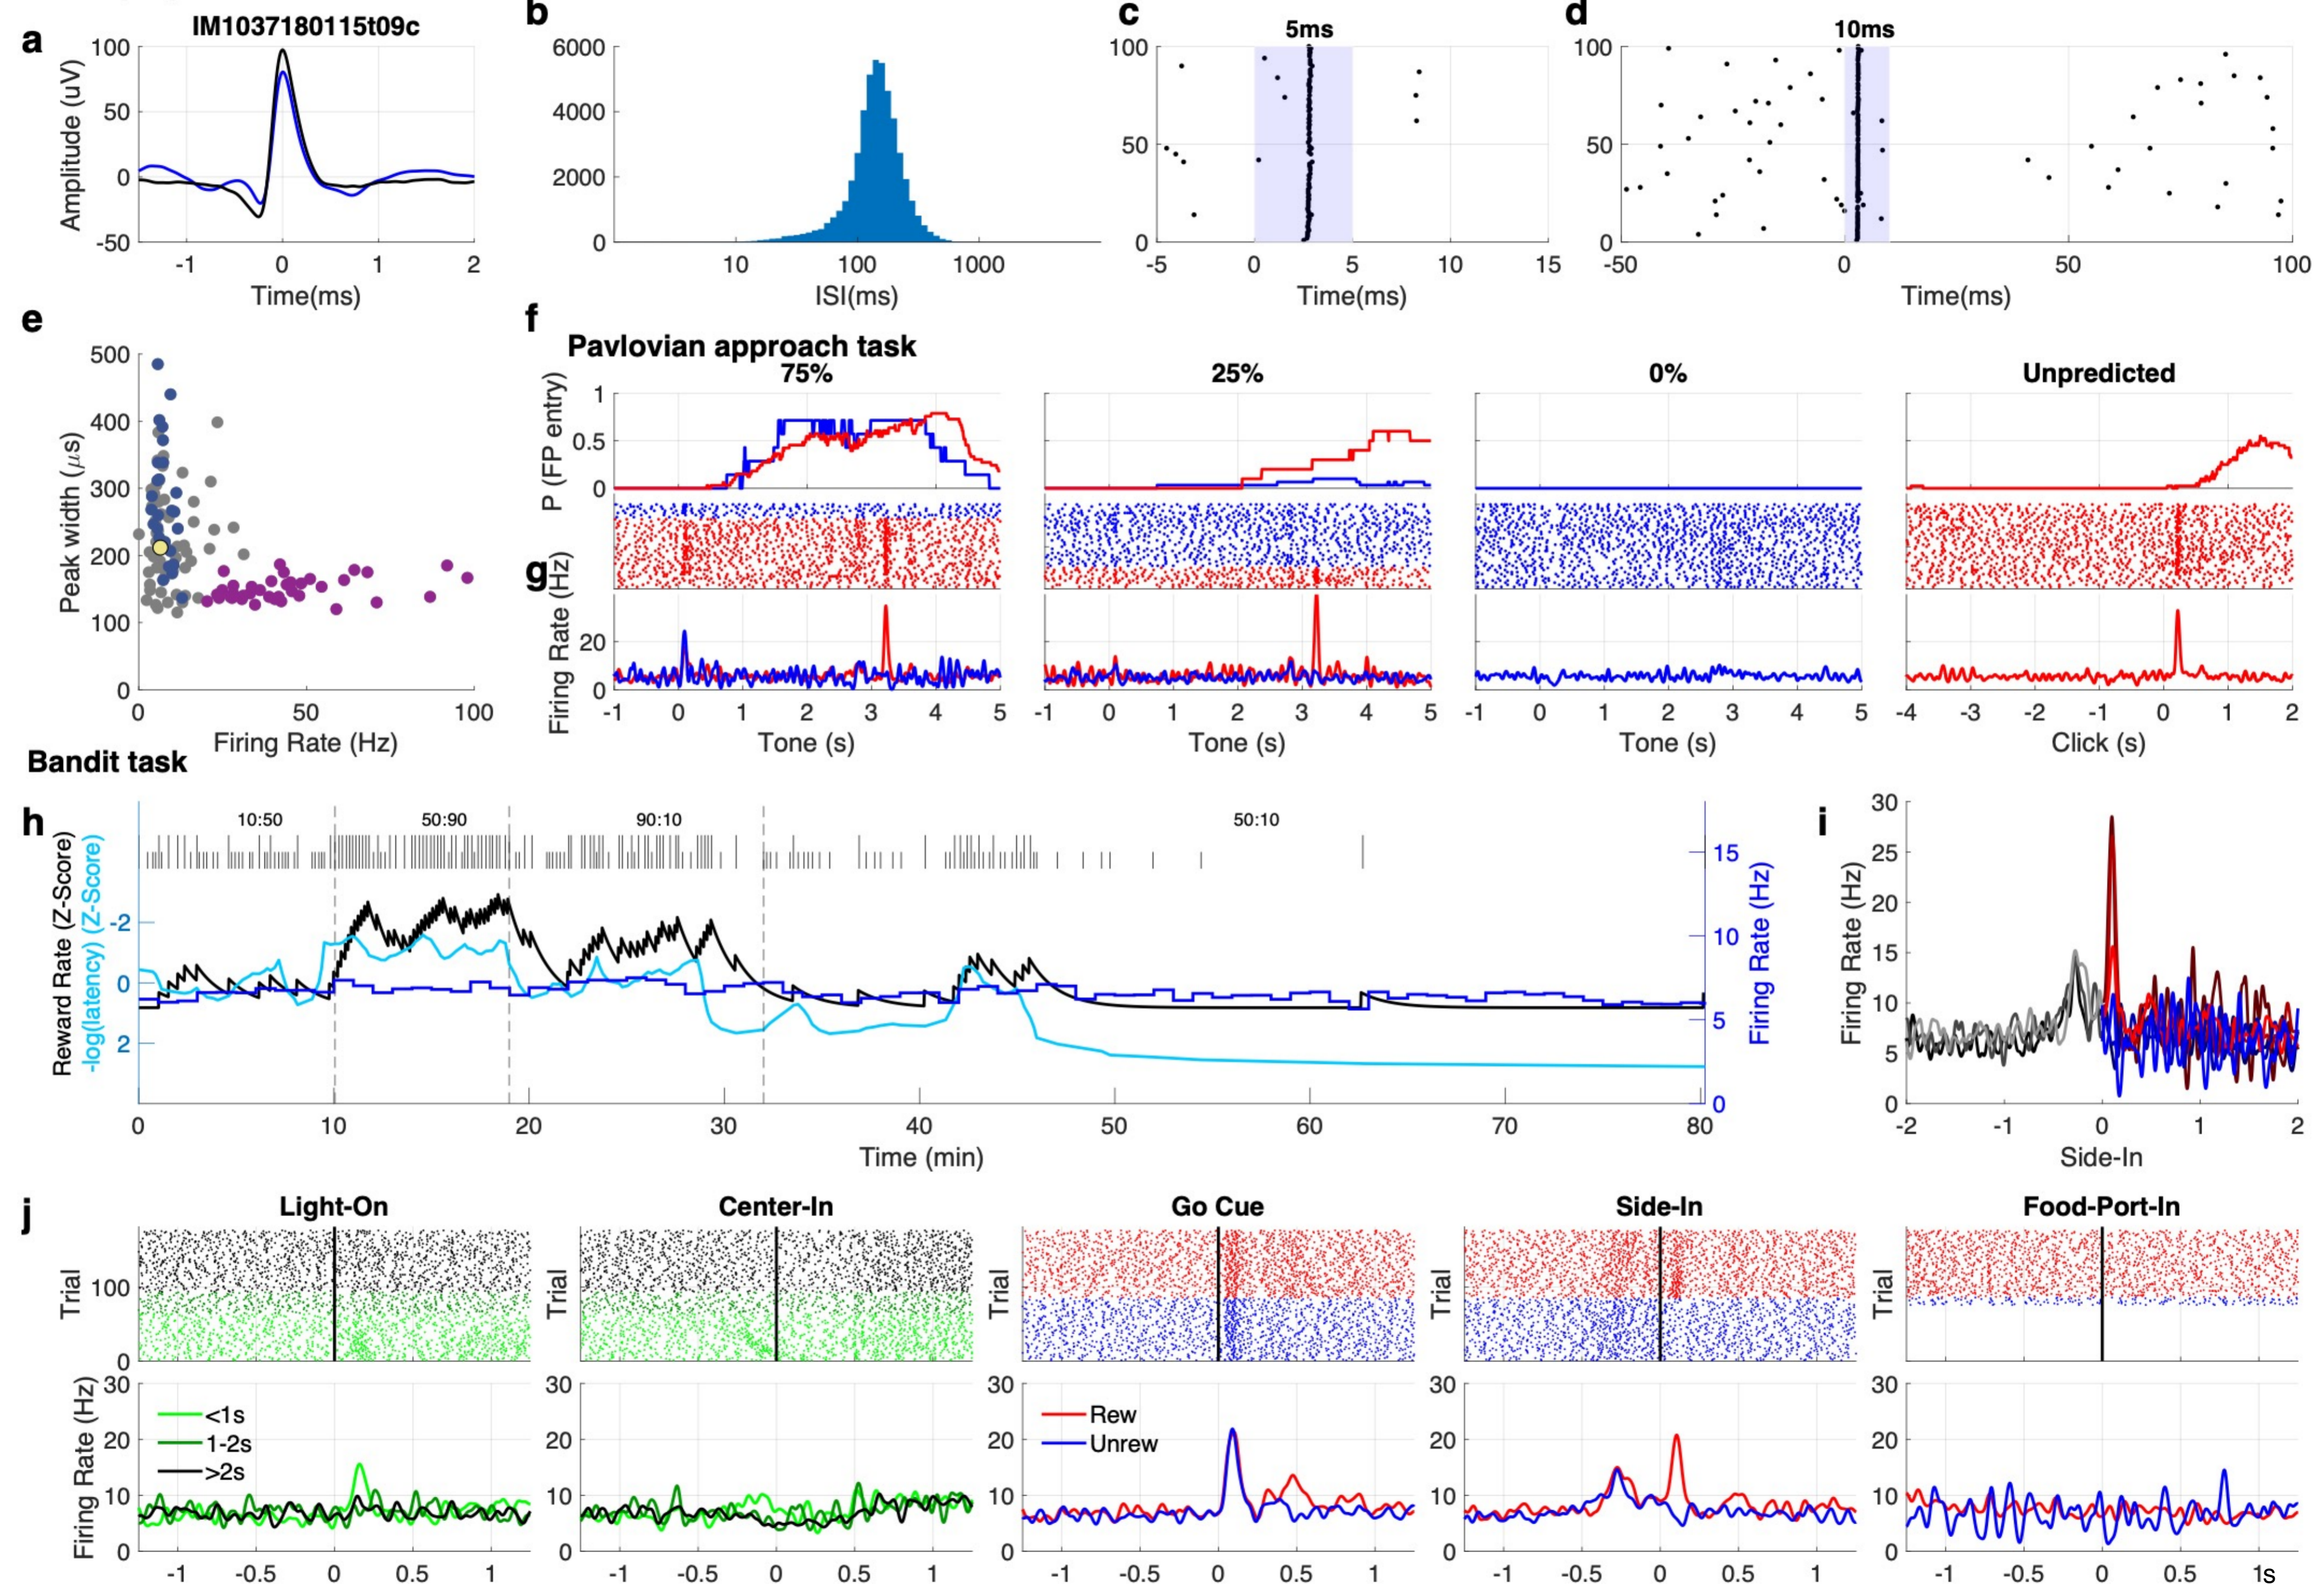

# Neuron properties and Identification

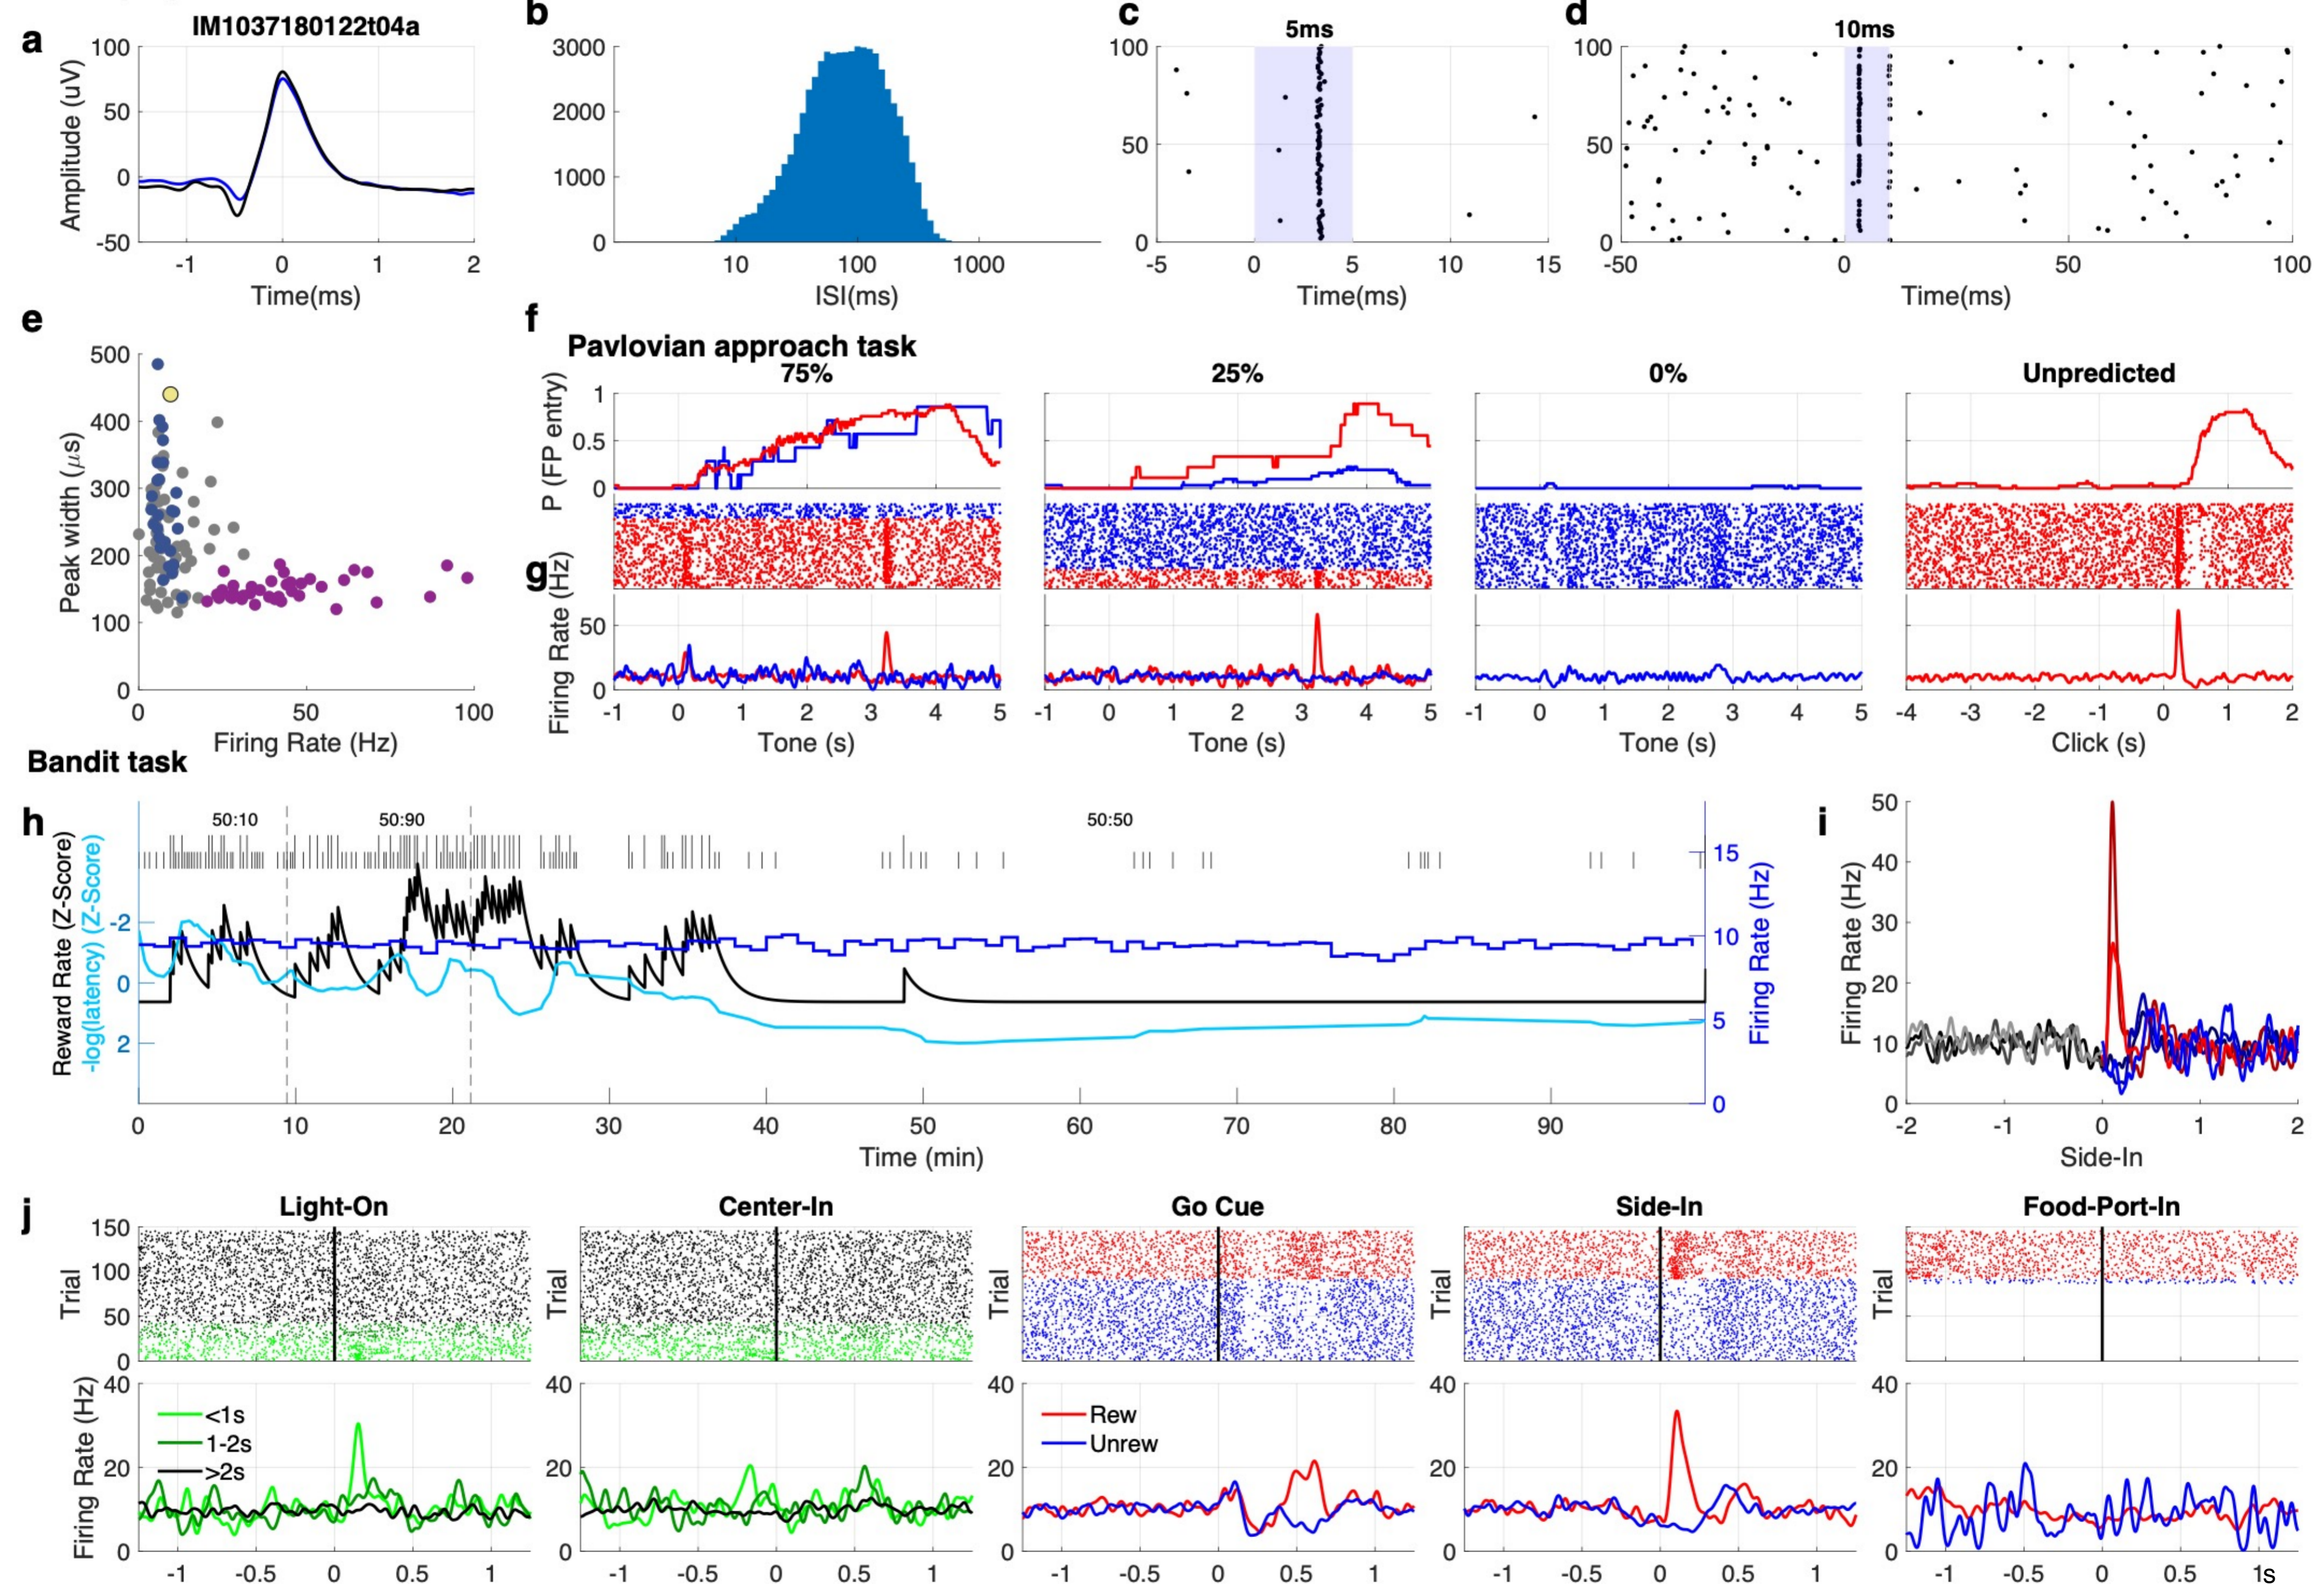

# Neuron properties and Identification (retro-infected)

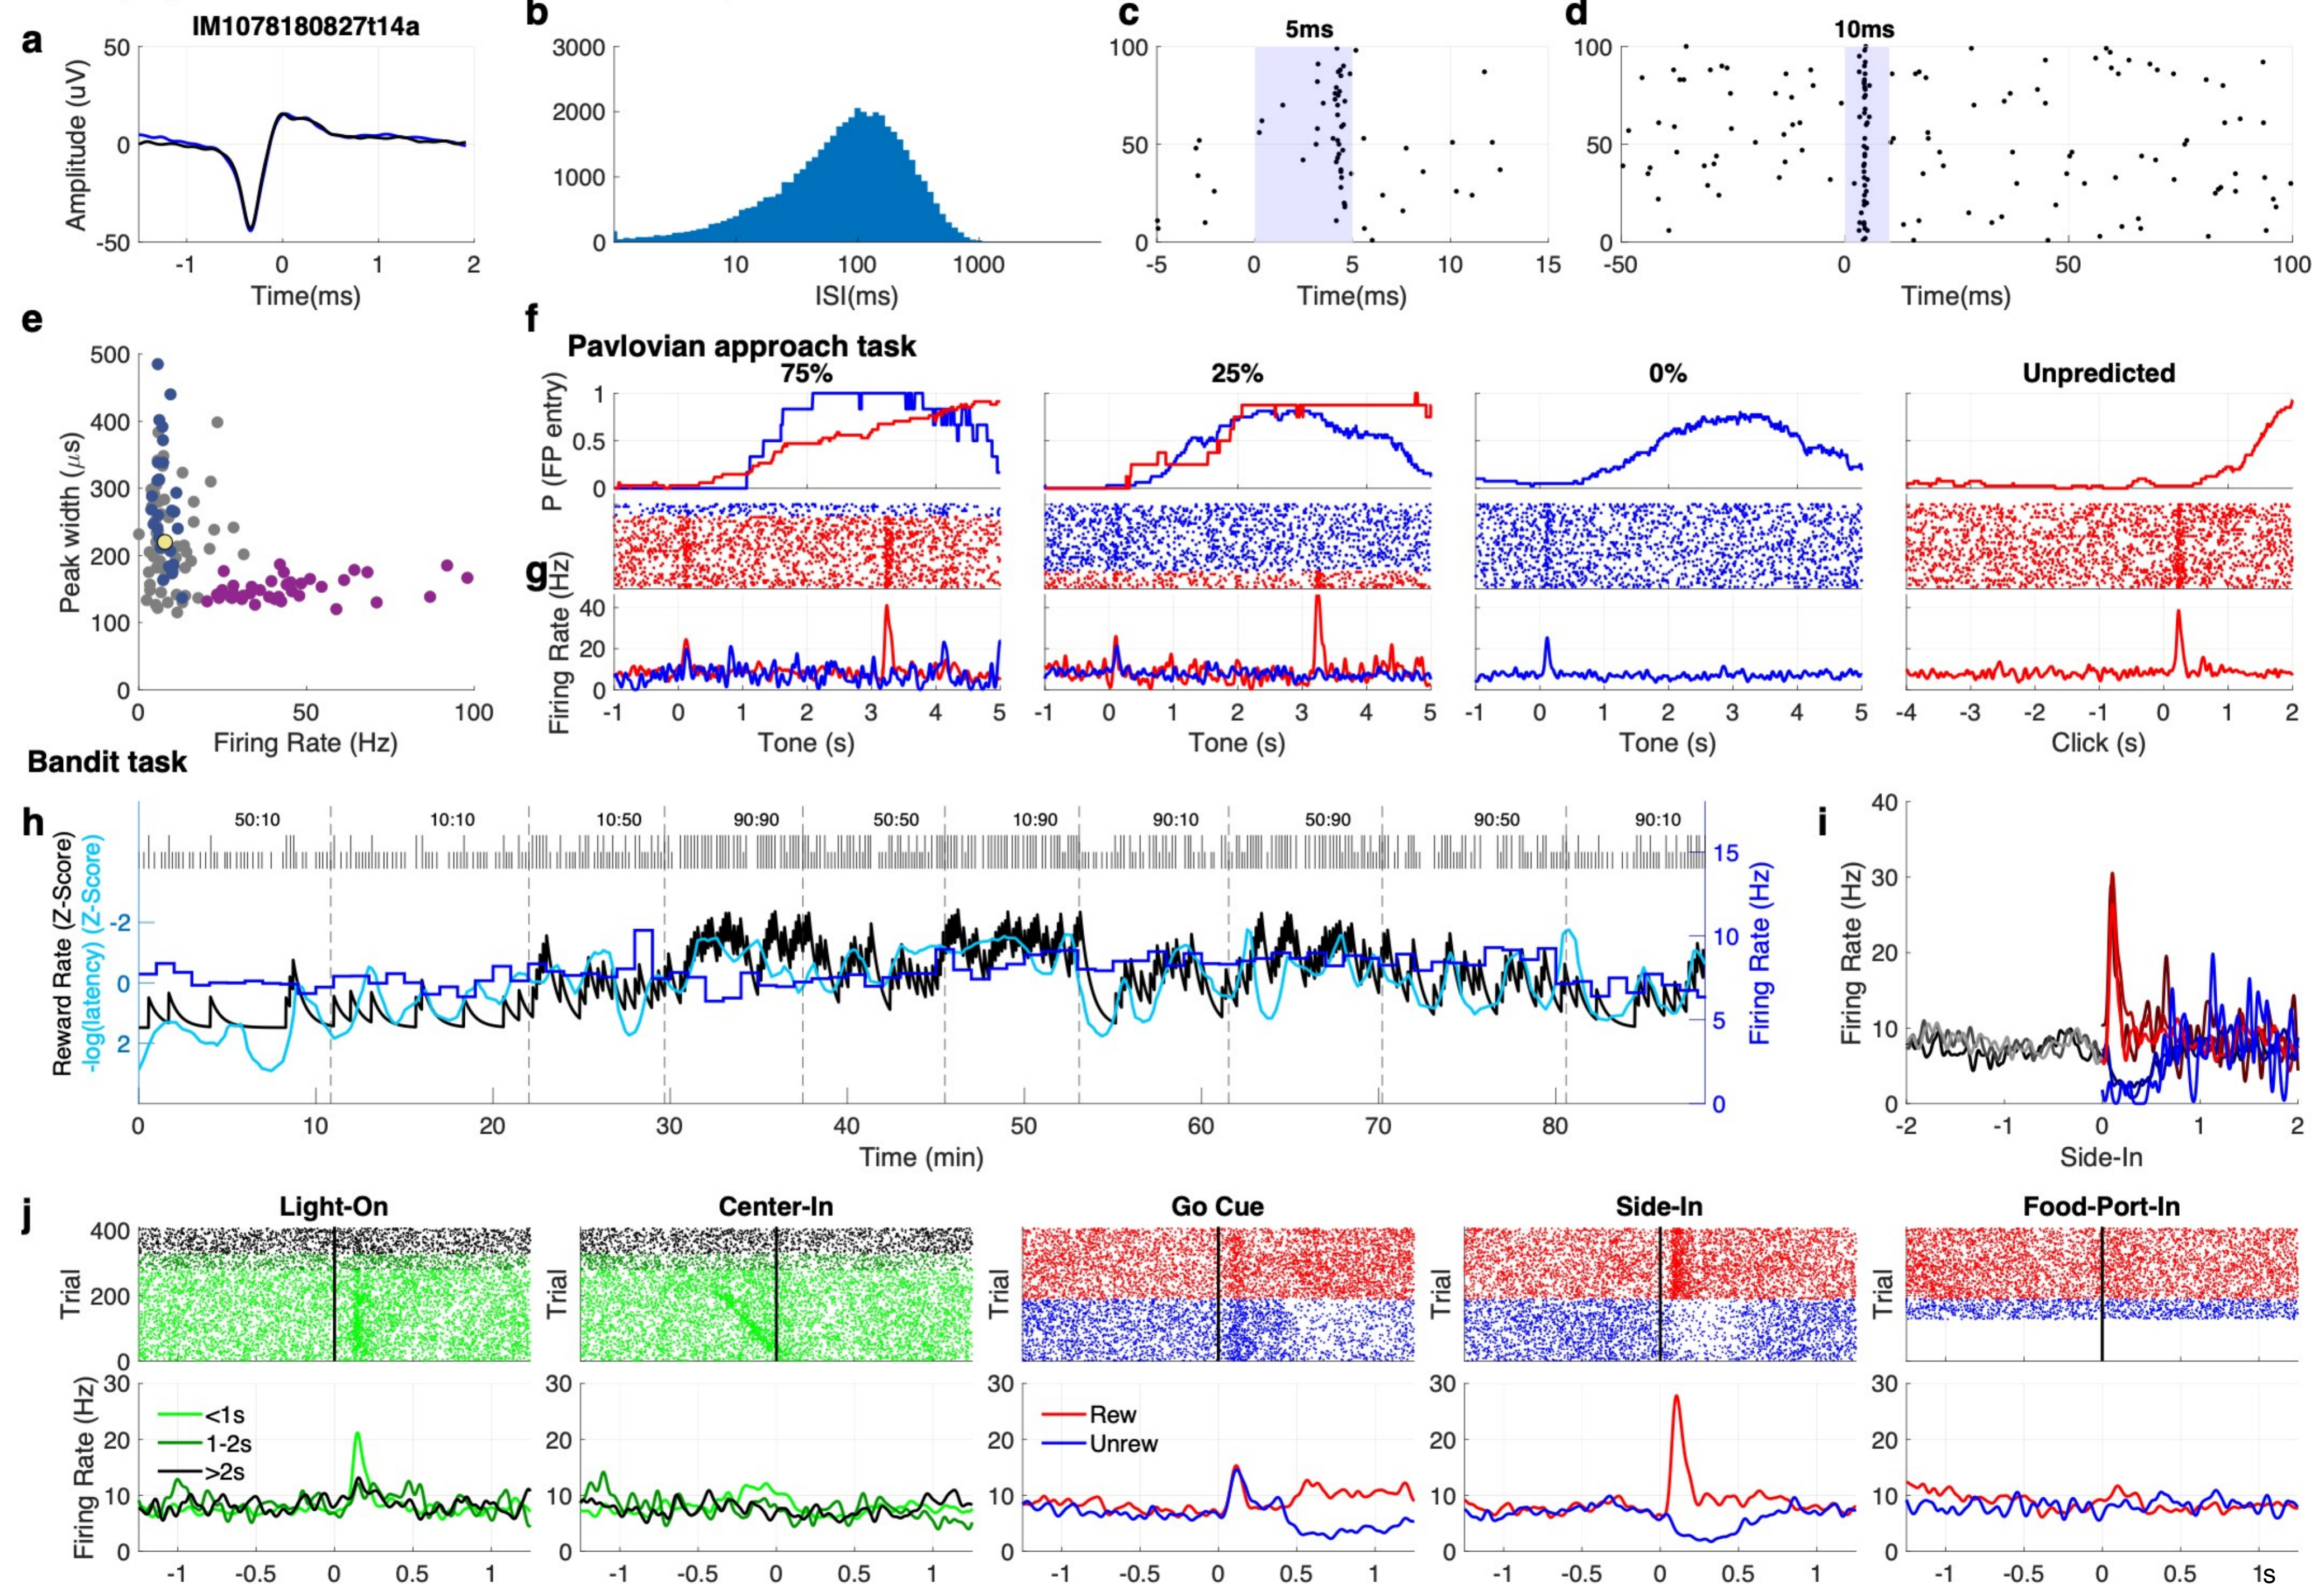

# Neuron properties and Identification (retro-infected)

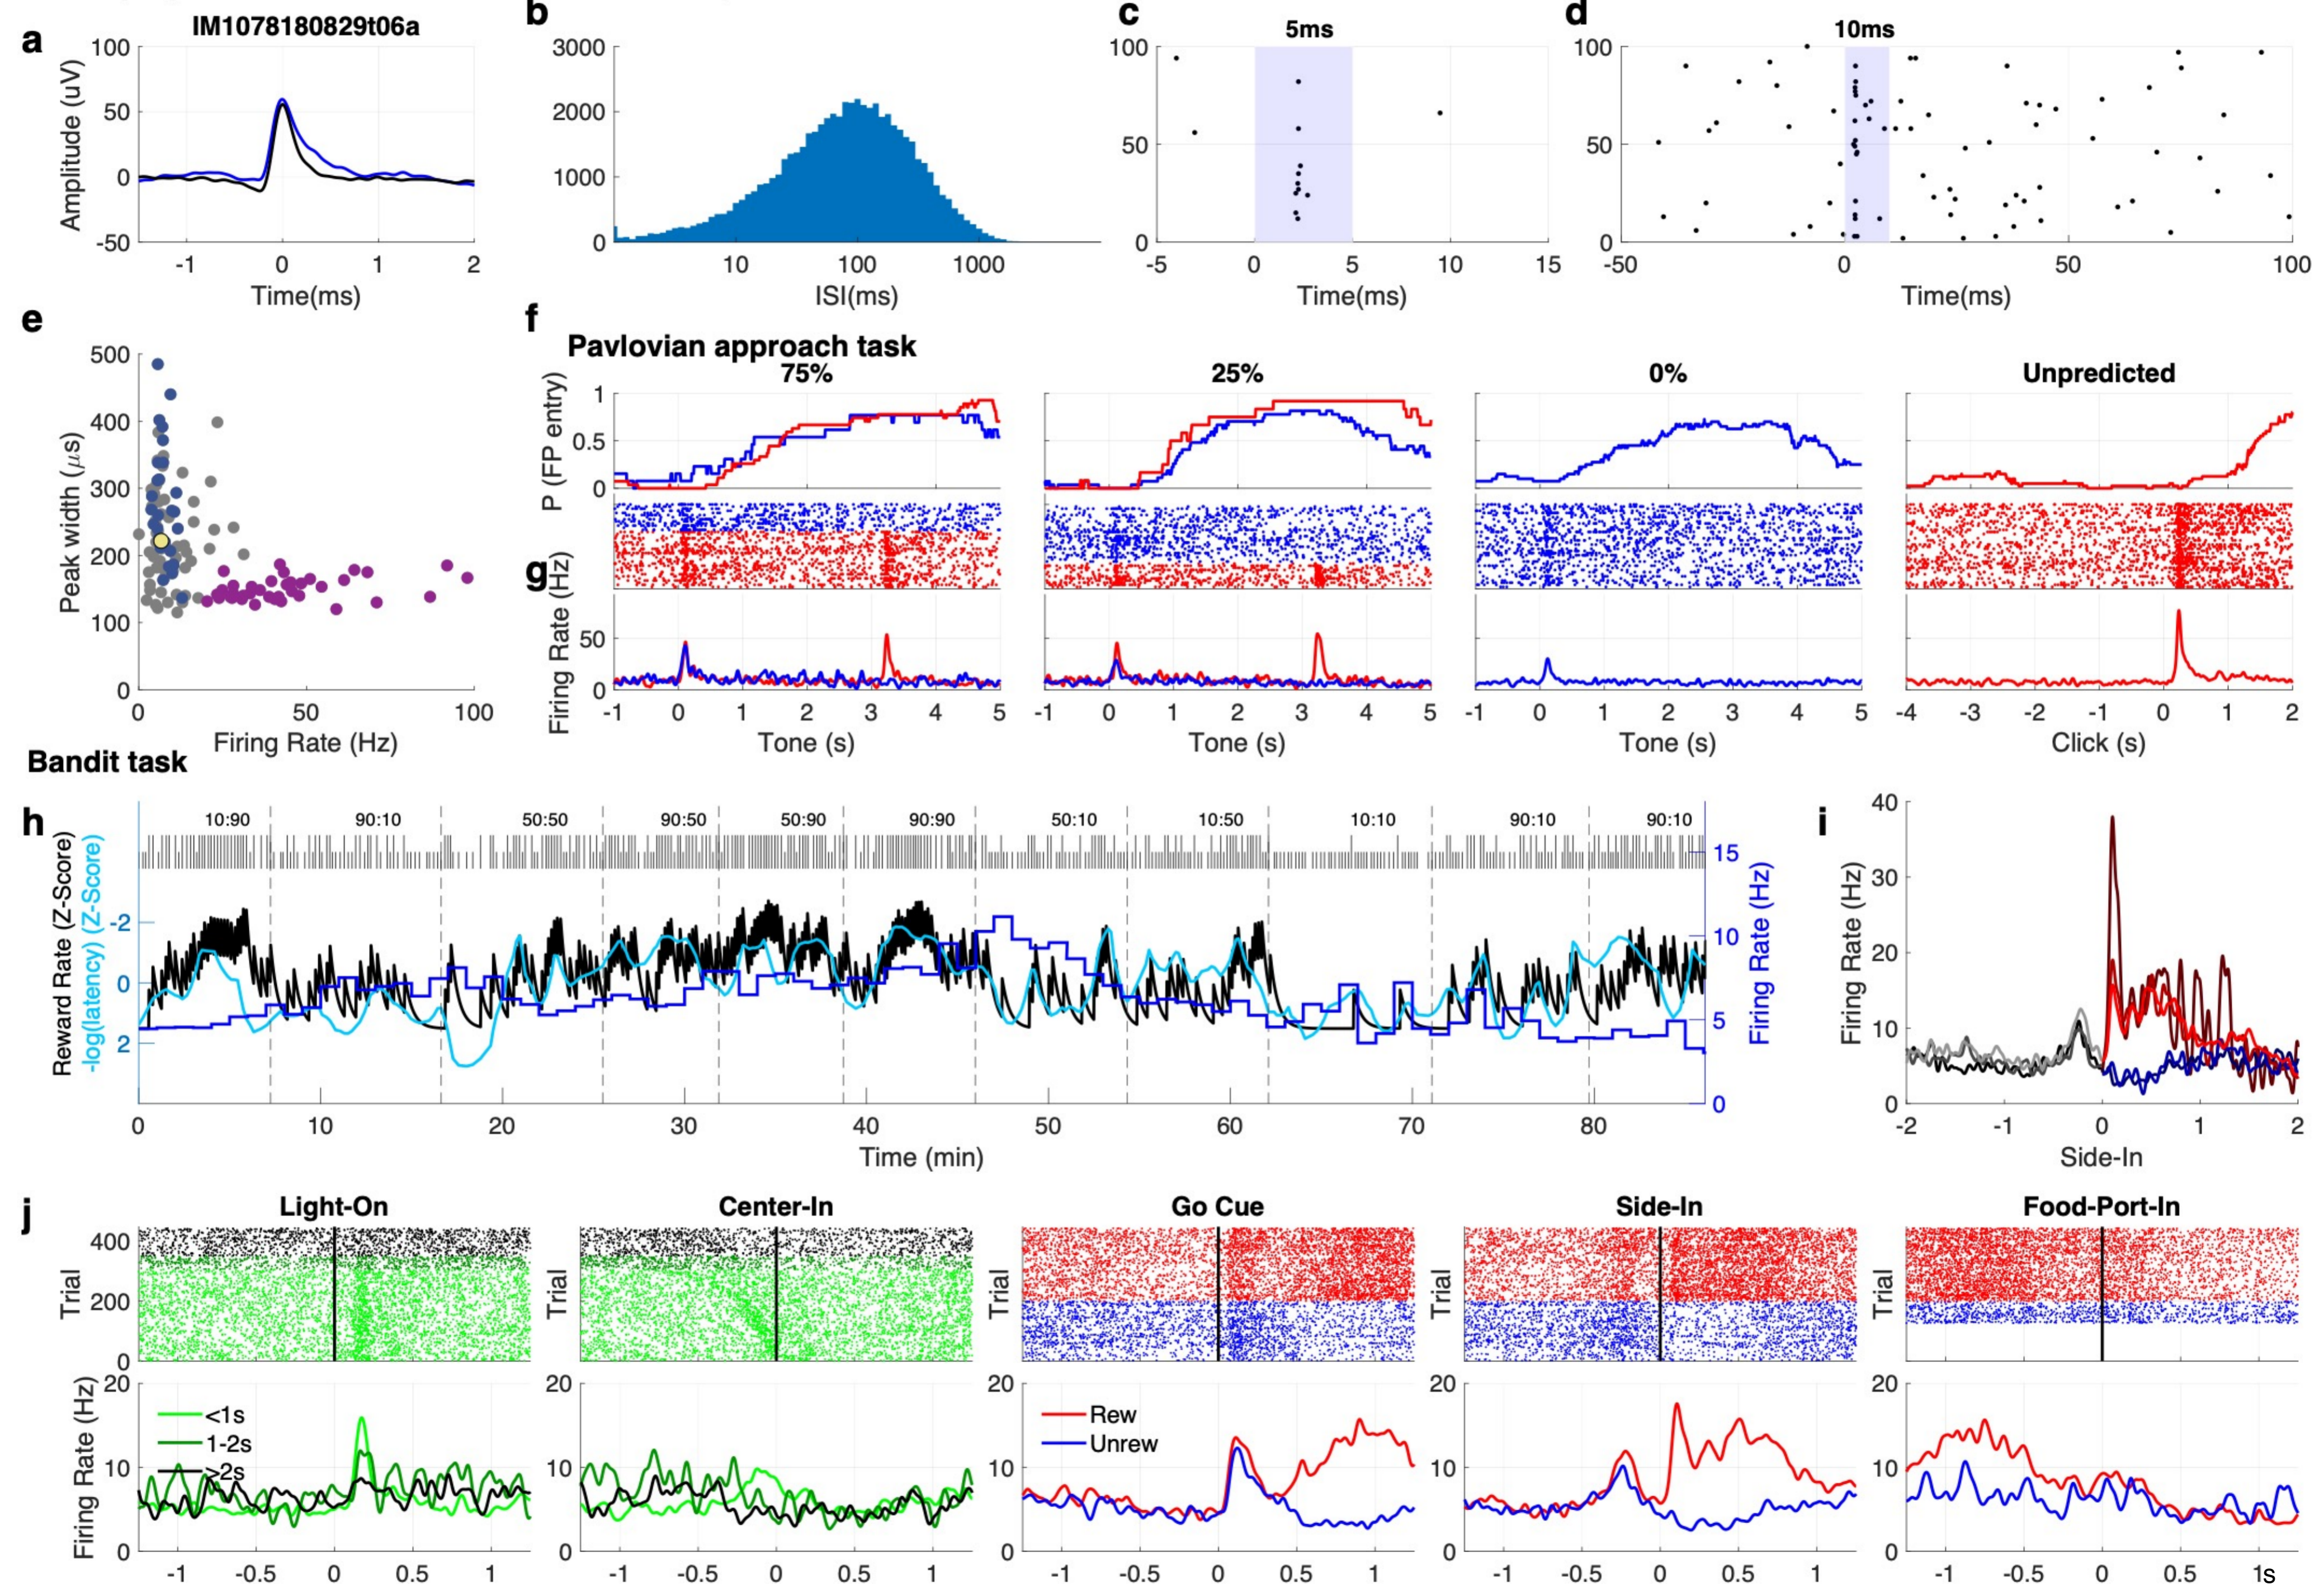

Supplement: NIHMS1528213-supplement-Supplementary_Figure.pdf [file NIHMS1528213-supplement-Supplementary_Figure.pdf]
